# Supplementary material for: Versatile synthesis of functionalised dibenzothiophenes via Suzuki coupling and microwave-assisted ring closure
Source: Royal Society of Chemistry journal article supplement (doi:10.1039/c1ob05282a), 2011-01-01
Supplement: c1ob05282a_2.pdf [file c1ob05282a_2.pdf]

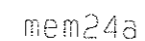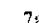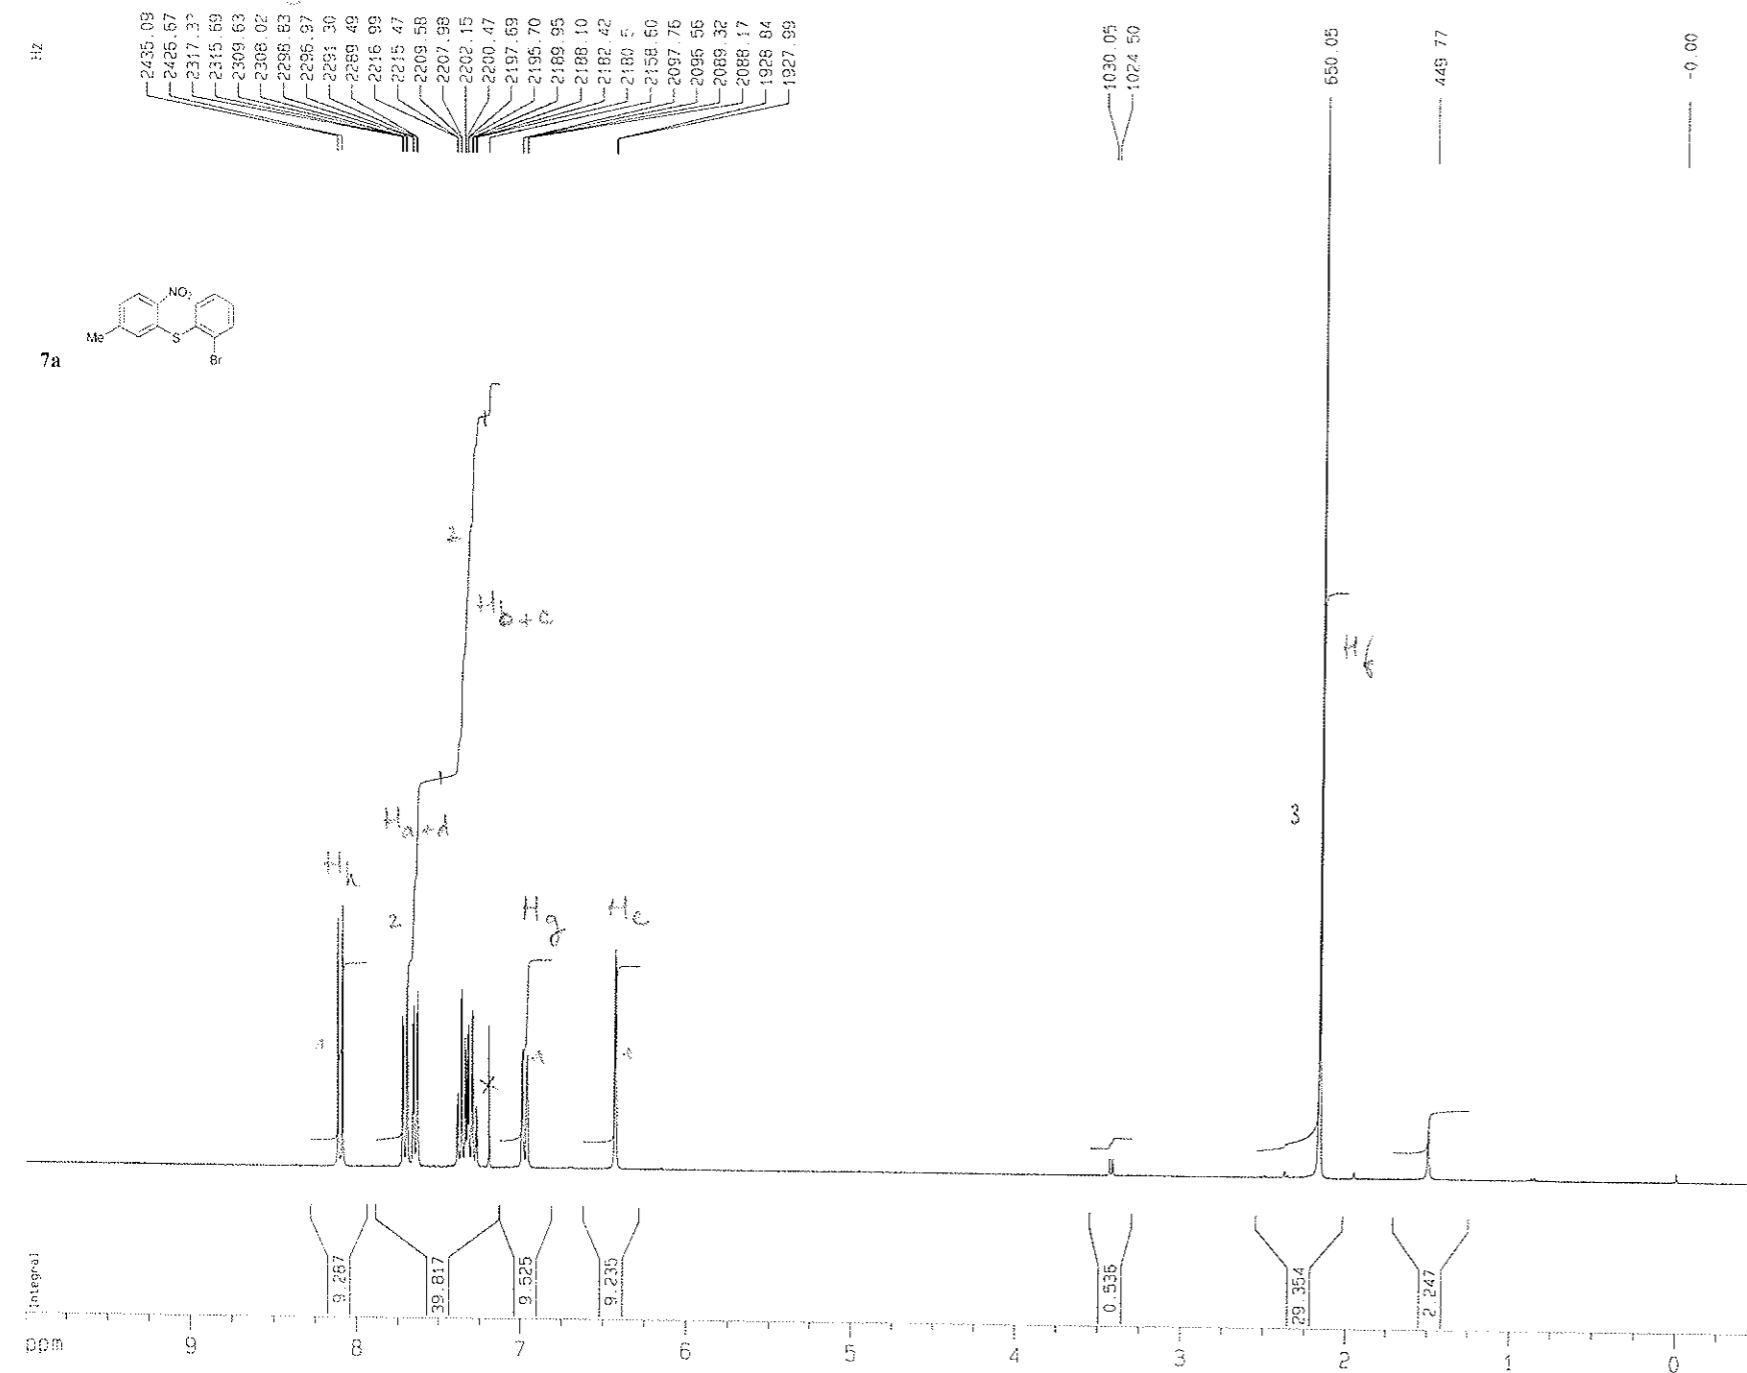

```

1D NMR plot parameters
CX              23.00 cm
CY              16.00 cm
F1P            10.000 ppm
F1              3001.30 Hz
F2P            -0.500 ppm
F2              -150.07 Hz
PPMCM           0.45652 ppm/cm
HZCM            137.01586 Hz/cm

```

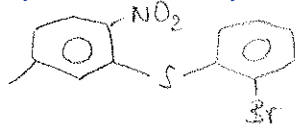

7a.

mem24a

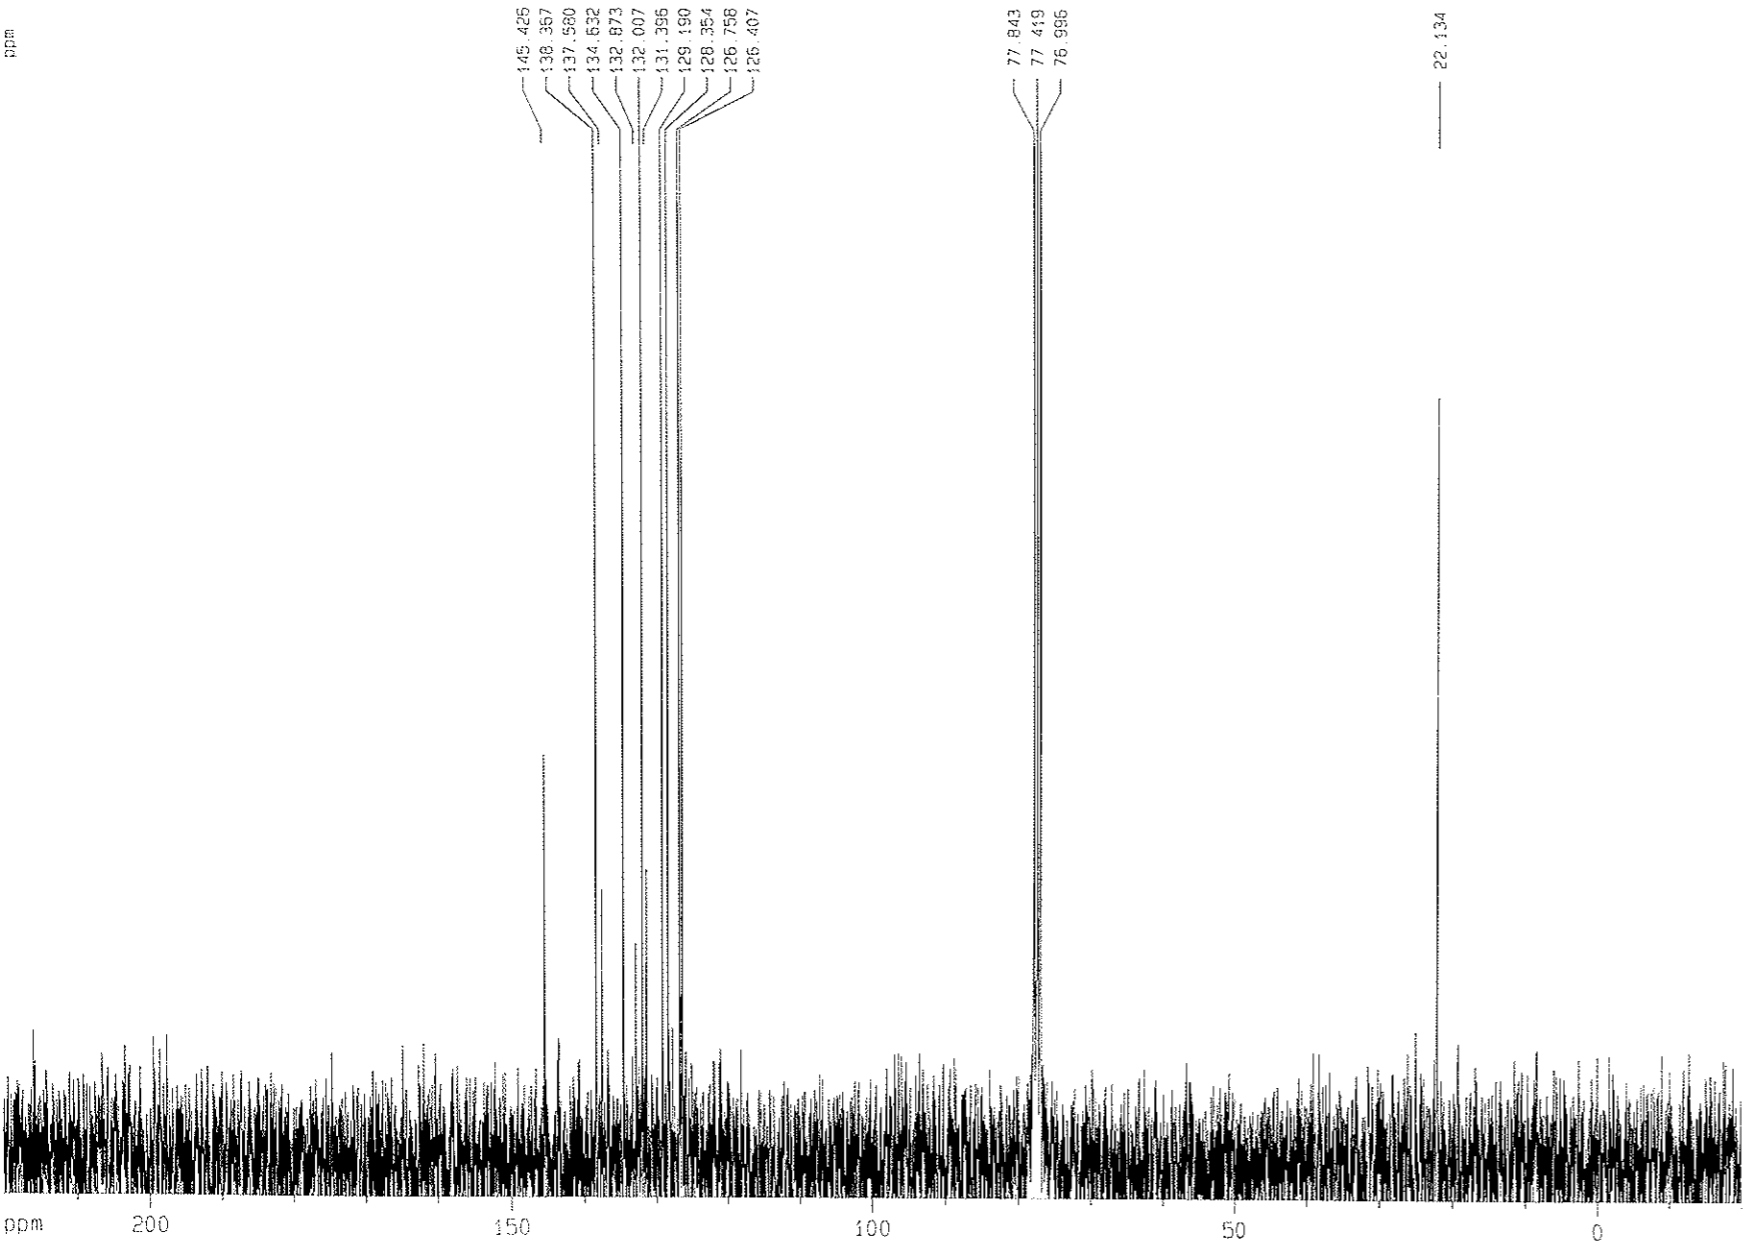

Current Data Parameters  
NAME 71  
EXPNO 2.2  
PROCNO 1

F2 - Acquisition Parameters  
Date\_ 20040225  
Time 17.11  
INSTRUM test  
PROBHD 5 mm Multinuc1  
PULPROG zgpg30  
TD 35968  
SOLVENT CDCl3  
NS 256  
DS 4  
SWH 24038.461 Hz  
FIDRES 0.668329 Hz  
AQ 0.7482052 sec  
RG 60.6  
DW 20.800 usec  
DE 6.00 usec  
TE 300.0 K  
D1 1.25000000 sec  
d11 0.03006000 sec  
d12 0.00002000 sec

\*\*\*\*\* CHANNEL f1 \*\*\*\*\*  
NUC1 13C  
P1 7.20 usec  
PL1 1.00 dB  
SF01 75.4752653 MHz

\*\*\*\*\* CHANNEL f2 \*\*\*\*\*  
CPDPRG2 waltz16  
NUC2 1H  
PCPD2 84.00 usec  
PL2 2.00 dB  
PL12 20.00 dB  
PL13 20.00 dB  
SF02 300.1312005 MHz

F2 - Processing parameters  
SI 32768  
SF 75.4677190 MHz  
WDW EM  
SSB 0  
LB 1.50 Hz  
GB 0  
PC 1.40

1D NMR plot parameters  
CX 23.00 cm  
CY 16.00 cm  
F1P 220.000 ppm  
F1 16602.90 Hz  
F2P -20.000 ppm  
F2 -1509.36 Hz  
PPHMC 10.43478 ppm/cm  
HZCM 787.48926 Hz/cm

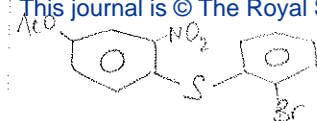

MEM56B

7b

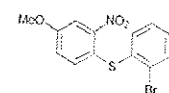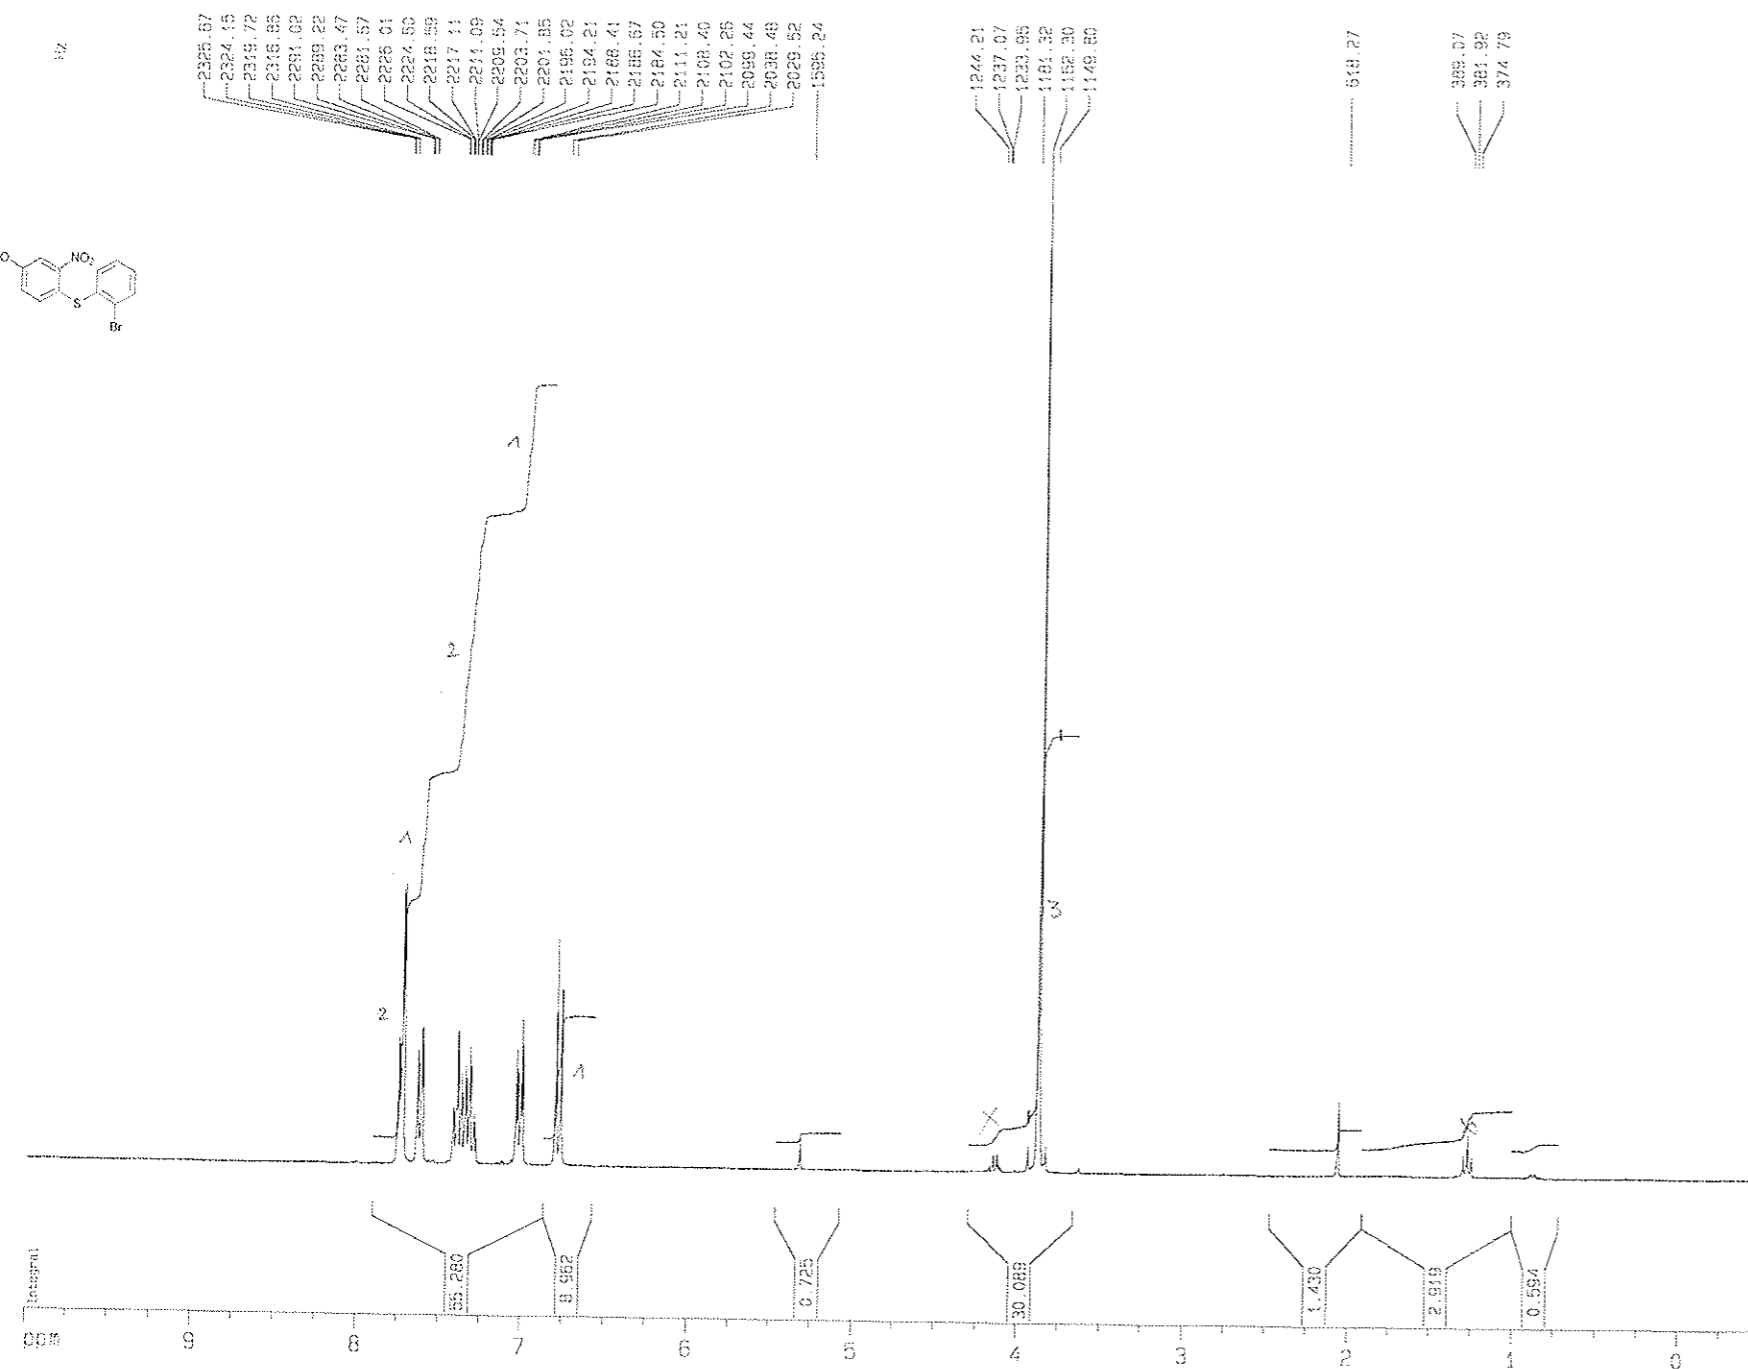

Current Data Parameters  
NAME J21  
EXPNO 555  
PROCNO 1

F2 - Acquisition Parameters  
Date\_ 20040510  
Time 17.41  
INSTRUM test  
PROBHD 5 mm Multinucl  
PULPROG zg30  
TD 65536  
SOLVENT CDCl3  
NS 8  
DS 2  
SWH 6188.119 Hz  
FIDRES 0.094423 Hz  
AQ 5.2854397 sec  
RG 256  
DX 60.800 usec  
DE 6.00 usec  
TE 300.0 K  
D1 1.00000000 sec

\*\*\*\*\* CHANNEL f1 \*\*\*\*\*  
NUC1 1H  
P1 10.10 usec  
PL1 2.00 dB  
SFO1 300.1316534 MHz

F2 - Processing parameters  
SI 32768  
SF 300.1300000 MHz  
WDW EM  
SSB 0  
LB 0.30 Hz  
GB 0  
PC 4.00

1D NMR plot parameters  
CX 23.00 cm  
CY 16.00 cm  
F1P 10.000 ppm  
F1 3001.30 Hz  
F2P -0.500 ppm  
F2 -150.07 Hz  
PPMCM 0.45652 ppm  
HZCM 137.01587 Hz/t

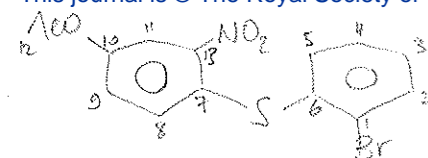

MEM56B

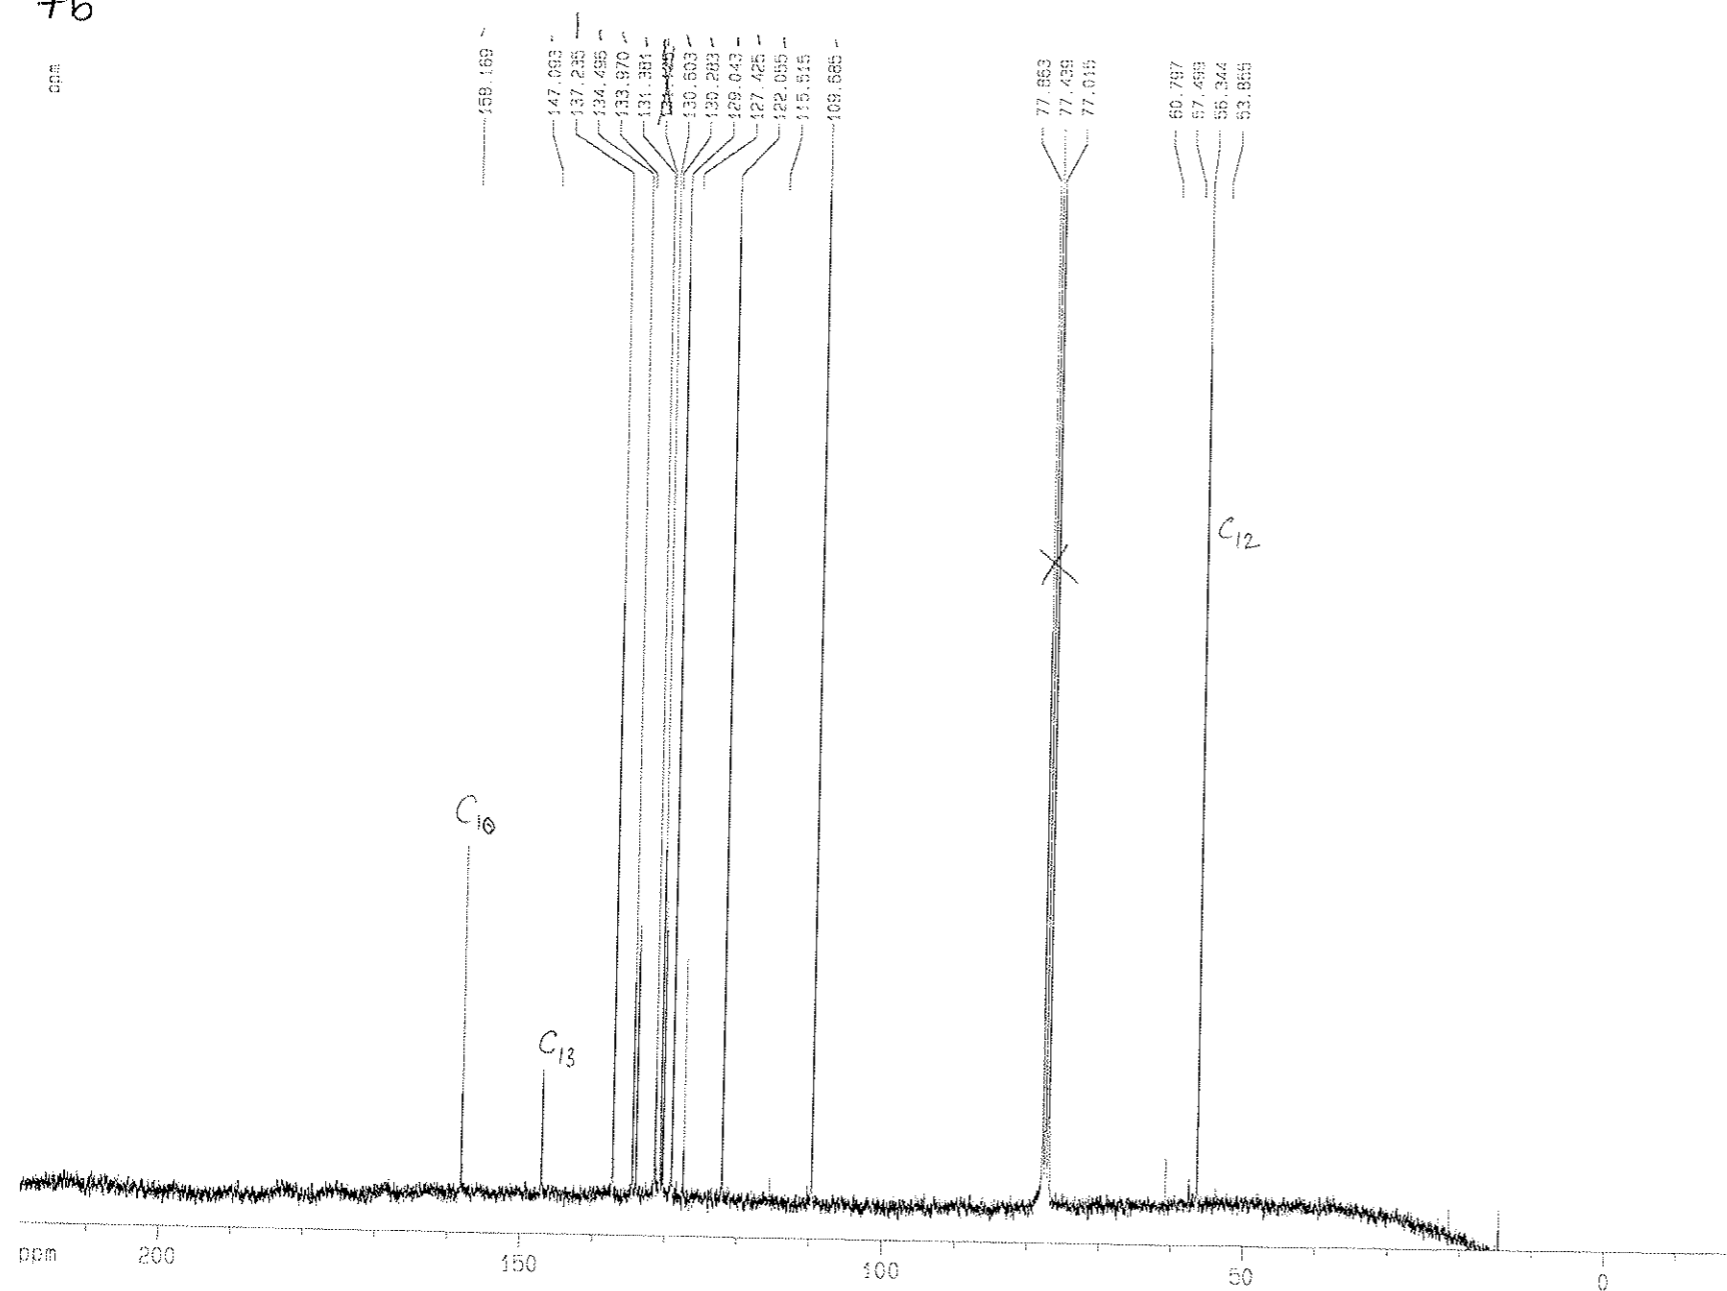

Current Data Parameters  
NAME J21  
EXPNO 557  
PROCNO 1

F2 - Acquisition Parameters  
Date\_ 20040510  
Time 19.47  
INSTRUM test  
PROBHD 5 mm Multinuc1  
PULPROG zgpg30  
TD 35968  
SOLVENT CDCl3  
NS 3600  
DS 4  
SWH 17985.611 Hz  
FIDRES 0.500045 Hz  
AQ 0.9999862 sec  
RG 32  
OW 27.860 usec  
DE 6.00 usec  
TE 300.0 K  
D1 1.00000000 sec  
d11 0.03000000 sec  
d12 0.0002000 sec

\*\*\*\*\* CHANNEL f1 \*\*\*\*\*  
NUC1 13C  
P1 7.20 usec  
PL1 1.00 dB  
SFO1 75.4752653 MHz

\*\*\*\*\* CHANNEL f2 \*\*\*\*\*  
CPDPRG2 waltz16  
NUC2 1H  
PCPD2 84.00 usec  
PL2 2.00 dB  
PL12 20.00 dB  
PL13 20.00 dB  
SFO2 300.1312005 MHz

F2 - Processing parameters  
SI 32768  
SF 75.4677190 MHz  
WDW EM  
SSB 0  
LB 1.50 Hz  
GB 0  
PC 1.40

1D NMR plot parameters  
CX 23.00 cm  
CY 16.00 cm  
F1P 220.000 ppm  
F1 16602.90 Hz  
F2F -20.000 ppm  
F2 -1509.36 Hz  
PPMCM 10.43478 ppm  
HZCM 787.48926 Hz/1

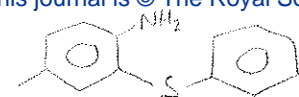

25b

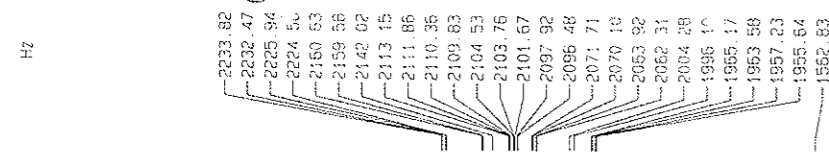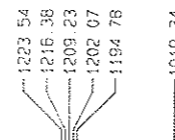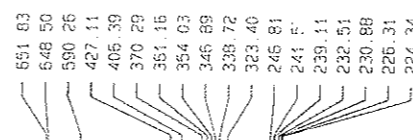

Current Data Param. 3  
NAME 1  
EXPNO 2.1  
PROCNO 1

F2 - Acquisition Parameters  
Date\_ 20040227  
Time 9.55  
INSTRUM test  
PROBHD 5 mm Multinuc1  
PULPROG zg30  
TD 65536  
SOLVENT CDCl3  
NS 8  
DS 2  
SWH 6188.119 Hz  
FIDRES 0.094423 Hz  
AQ 5.2954397 sec  
RG 203.2  
DW 80.800 usec  
DE 6.00 usec  
TE 300.0 K  
D1 1.00000000 sec

\*\*\*\*\* CHANNEL f1 \*\*\*\*\*  
NUC1 1H  
P1 10.10 usec  
PL1 2.00 dB  
SFO1 300.1318534 MHz

F2 - Processing parameters  
SI 32768  
SF 300.1300339 MHz  
WDW EM  
SSB 0  
LB 0.30 Hz  
GB 0  
PC 4.00

1D NMR plot parameters  
CX 23.00 cm  
CY 16.00 cm  
F1P 10.000 ppm  
F1 3001.30 Hz  
F2P -0.500 ppm  
F2 -150.07 Hz  
PPMCM 0.45652 ppm/cm  
HZCM 137.01588 Hz/cm

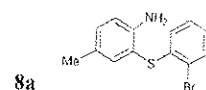

8a

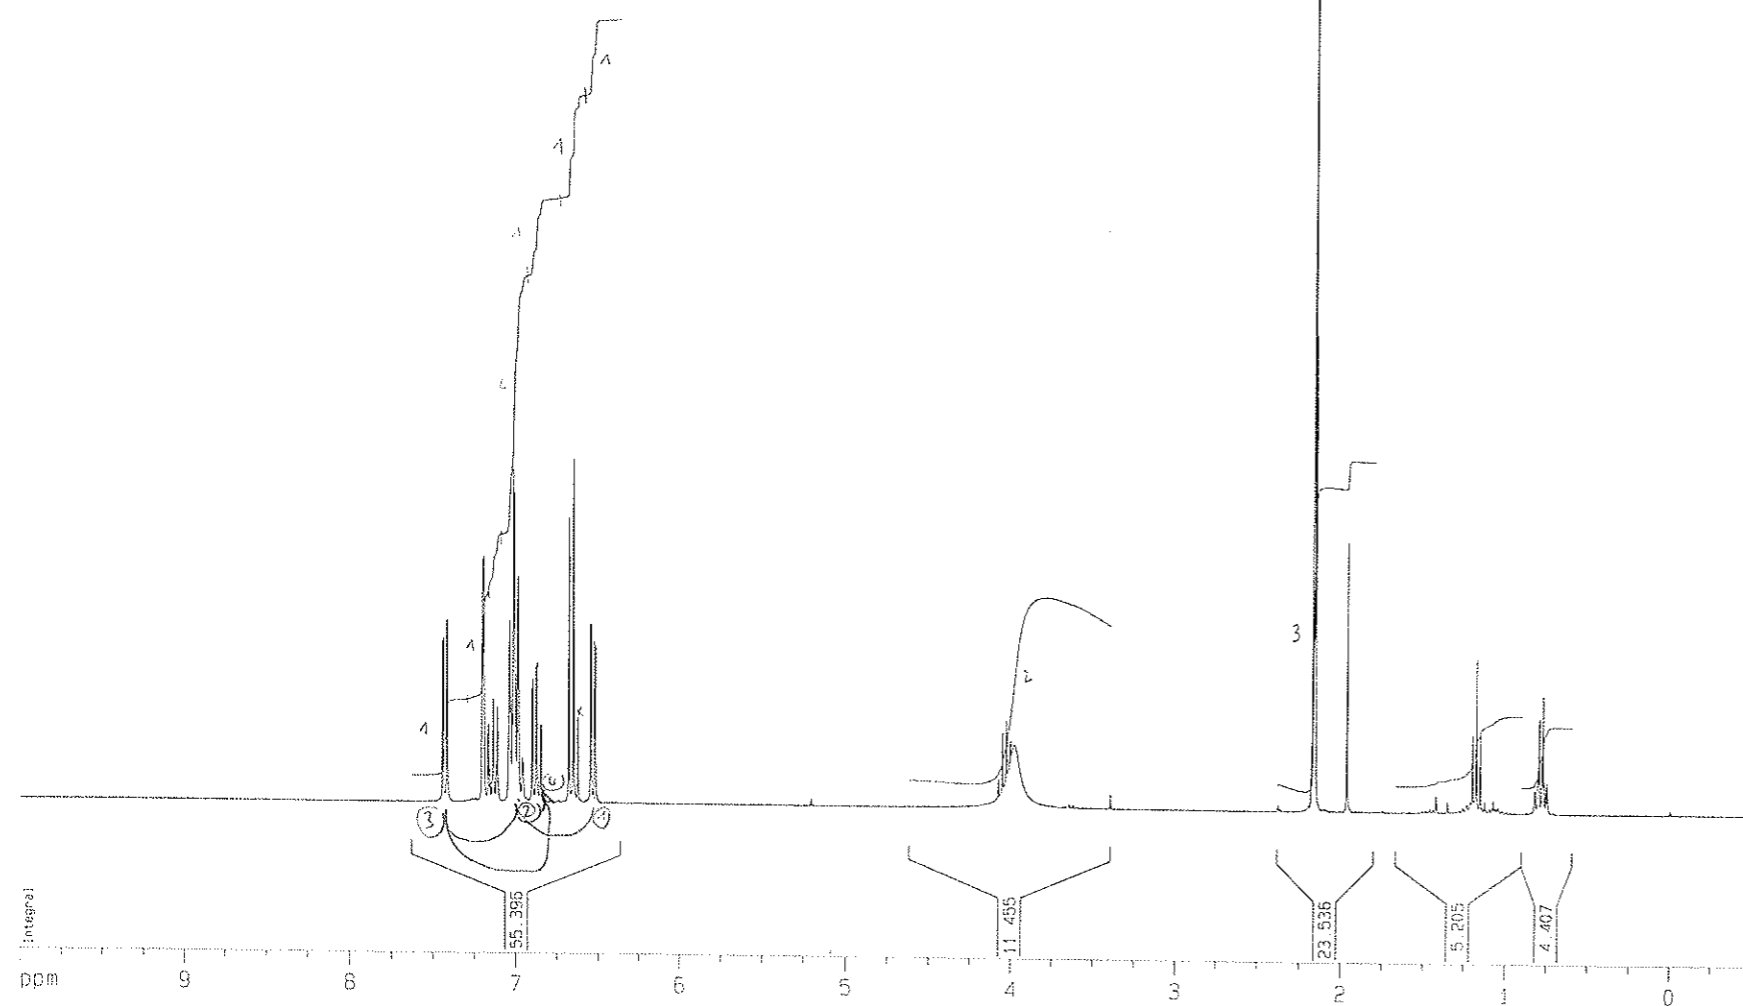

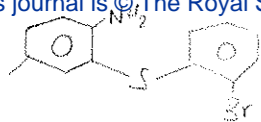

8a

me: 25b

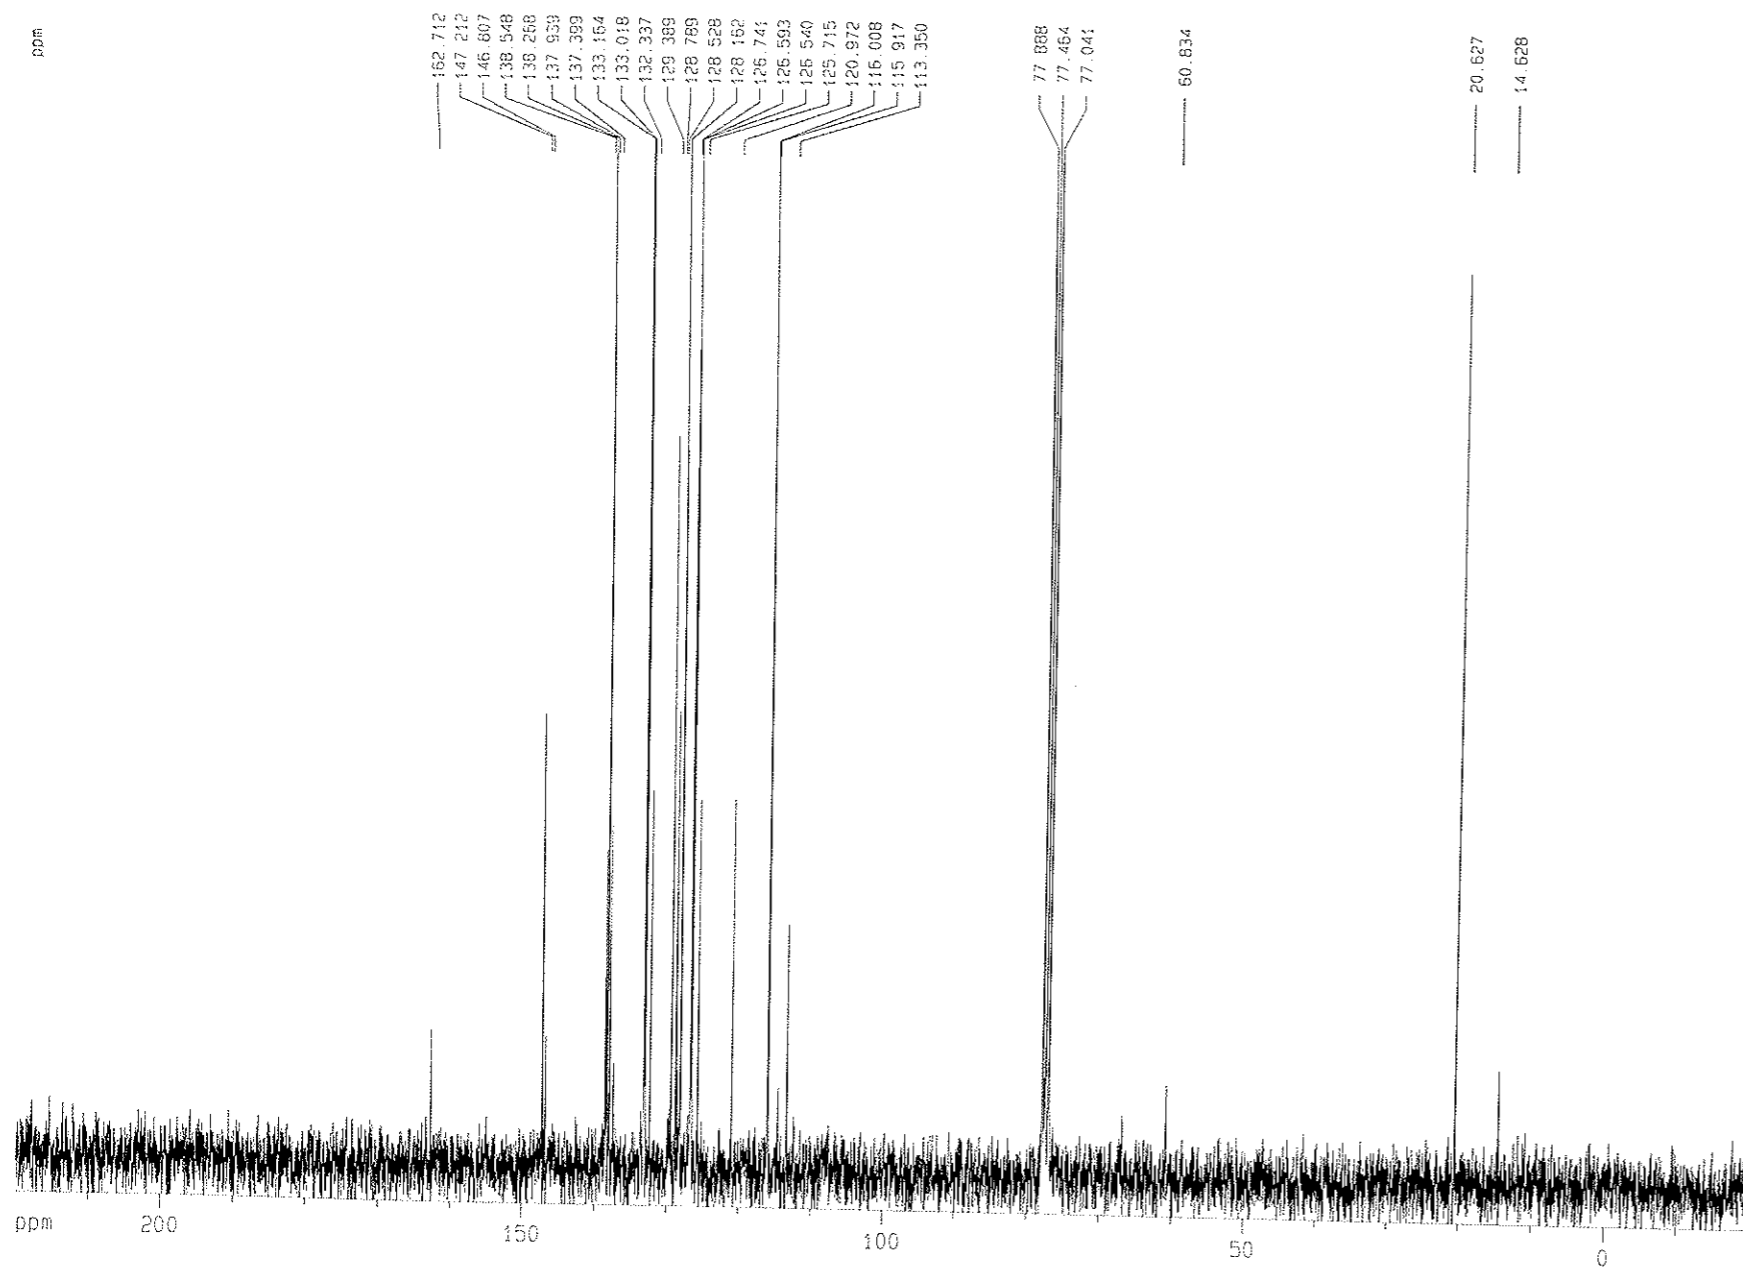

Current Data Parameters  
NAME: J21  
EXPNO: 283  
PROCNO: 1

F2 - Acquisition Parameters  
Date\_: 20040227  
Time: 10.09  
INSTRUM: test  
PROBHD: 5 mm Multinuc1  
PULPROG: zgpg30  
TD: 35968  
SOLVENT: CDCl3  
NS: 256  
DS: 4  
SWH: 24038.461 Hz  
FIDRES: 0.668329 Hz  
AQ: 0.7482052 sec  
RG: 25.4  
DW: 20.800 usec  
DE: 6.00 usec  
TE: 300.0 K  
D1: 1.25000000 sec  
d11: 0.03000000 sec  
d12: 0.00002000 sec

===== CHANNEL f1 =====  
NUC1: 13C  
P1: 7.20 usec  
PL1: 1.00 dB  
SFO1: 75.4752653 MHz

===== CHANNEL f2 =====  
CPDPRG2: waltz16  
NUC2: 1H  
PCPD2: 84.00 usec  
PL2: 2.00 dB  
PL12: 20.00 dB  
PL13: 20.00 dB  
SFO2: 300.1312005 MHz

F2 - Processing parameters  
SI: 32768  
SF: 75.4677190 MHz  
WDW: EM  
SSB: 0  
LB: 1.50 Hz  
GB: 0  
PC: 1.40

1D NMR plot parameters  
CX: 23.00 cm  
CY: 16.00 cm  
F1P: 220.000 ppm  
F1: 16602.90 Hz  
F2P: -20.000 ppm  
F2: -1509.36 Hz  
PPHCM: 10.43478 ppm/cm  
HZCM: 787.48926 Hz/cm

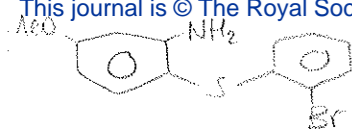

mem58a

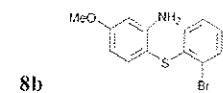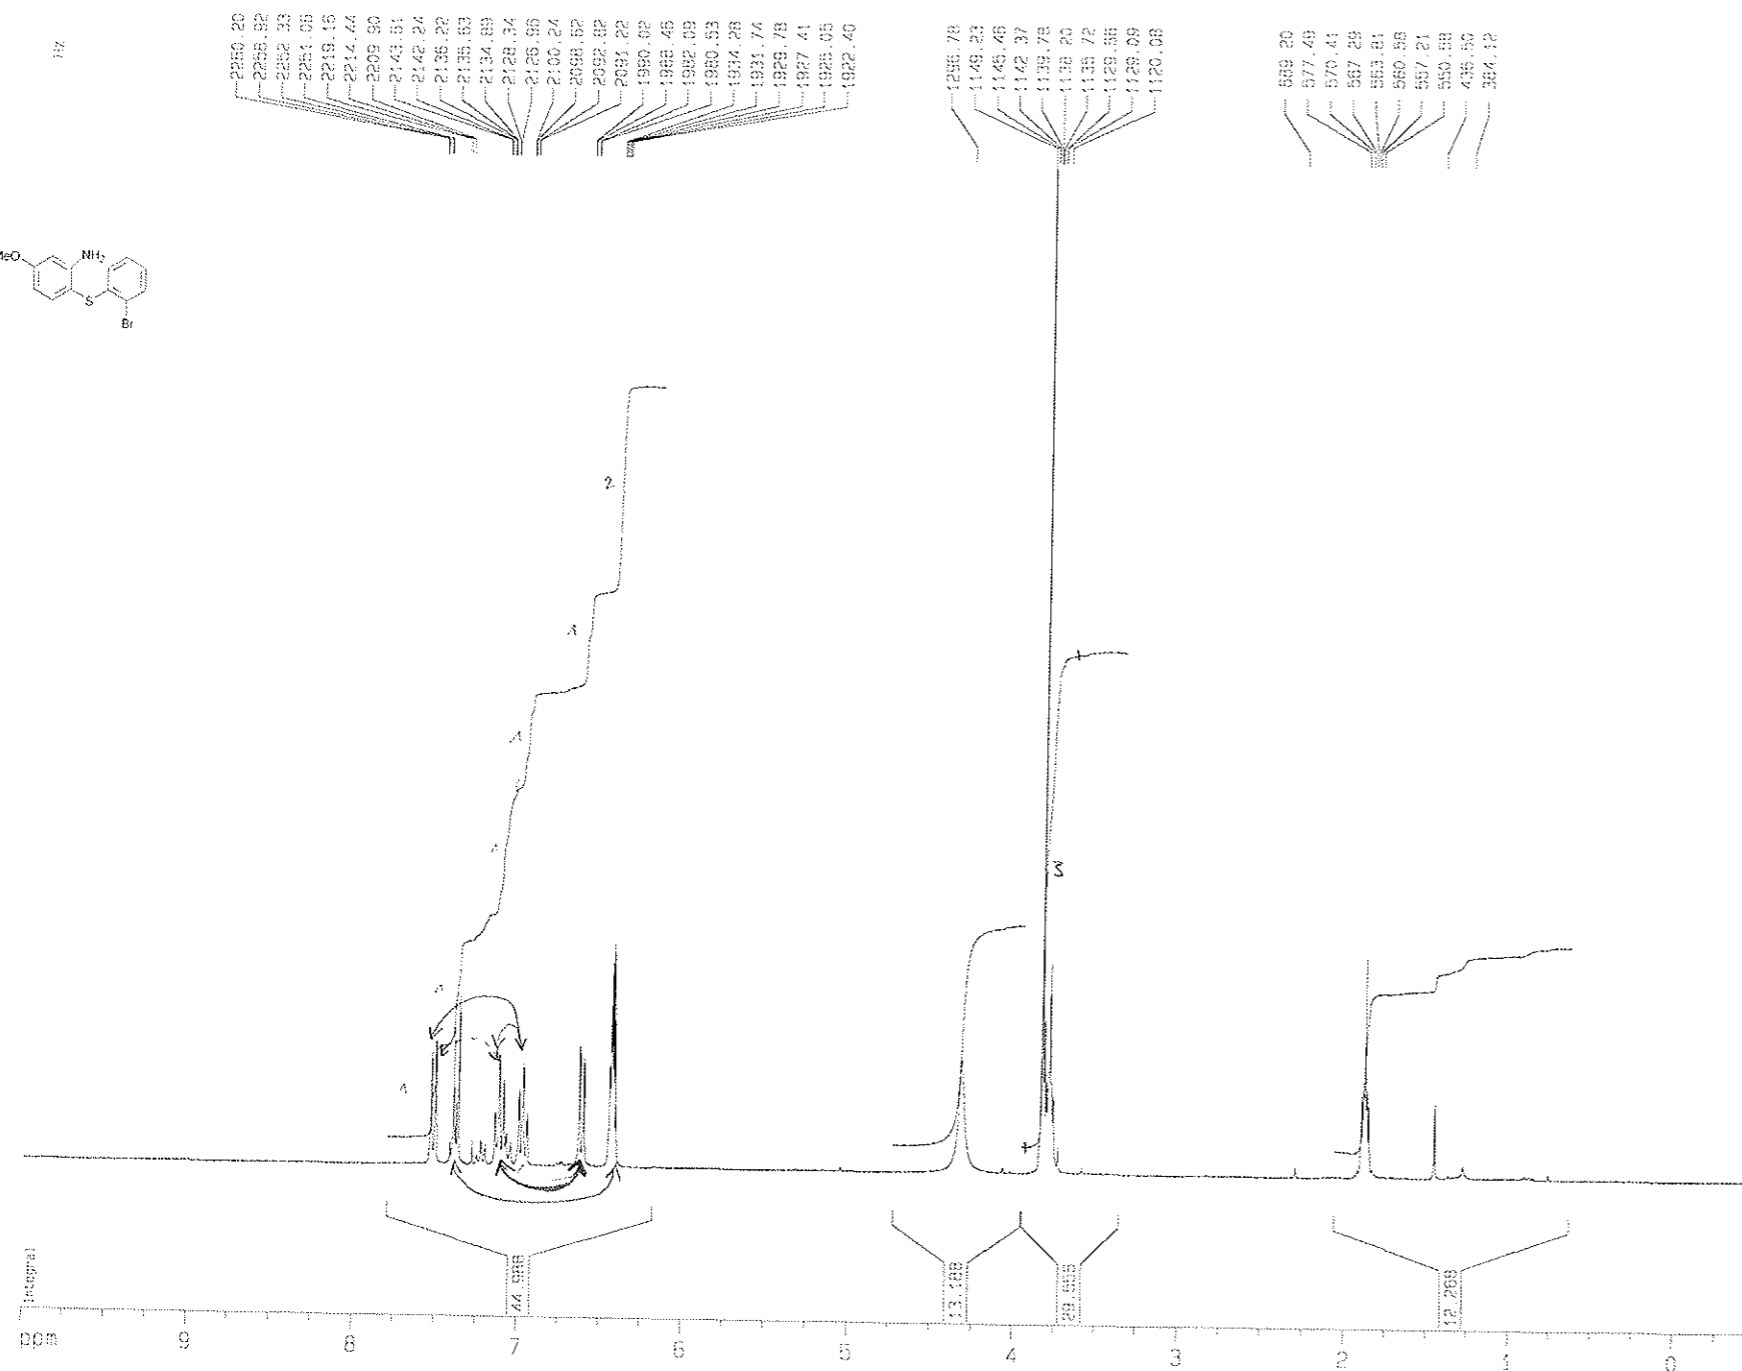

Current Data Parameters  
NAME J21  
EXPNO 555  
PROCNO 1

F2 - Acquisition Parameters  
Date\_ 20040912  
Time 22.48  
INSTRUM test  
PROBHD 5 mm Multinuc1  
PULPROG zg30  
TD 65536  
SOLVENT CDCl3  
NS 8  
DS 2  
SWH 8188.119 Hz  
FIDRES 0.094423 Hz  
AQ 5.2854397 sec  
RG 161.3  
DN 80.600 usec  
DE 5.00 usec  
TE 300.0 K  
D1 1.0000000 sec

\*\*\*\*\* CHANNEL f1 \*\*\*\*\*  
NUC1 1H  
P1 10.10 usec  
PL1 2.00 dB  
SFO1 300.1318534 MHz

F2 - Processing parameters  
SI 32768  
SF 300.1300000 MHz  
WDW EM  
SSB 0  
LB 0.30 Hz  
GB 0  
PC 4.00

1D NMR plot parameters  
CX 23.00 cm  
CY 15.00 cm  
F1P 10.000 ppm  
F1 3001.30 Hz  
F2P -0.500 ppm  
F2 -150.07 Hz  
PPMCM 0.45652 ppm/  
HZCM 137.01587 Hz/1

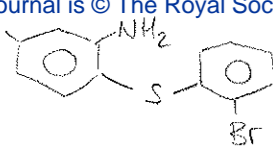

MEM58A

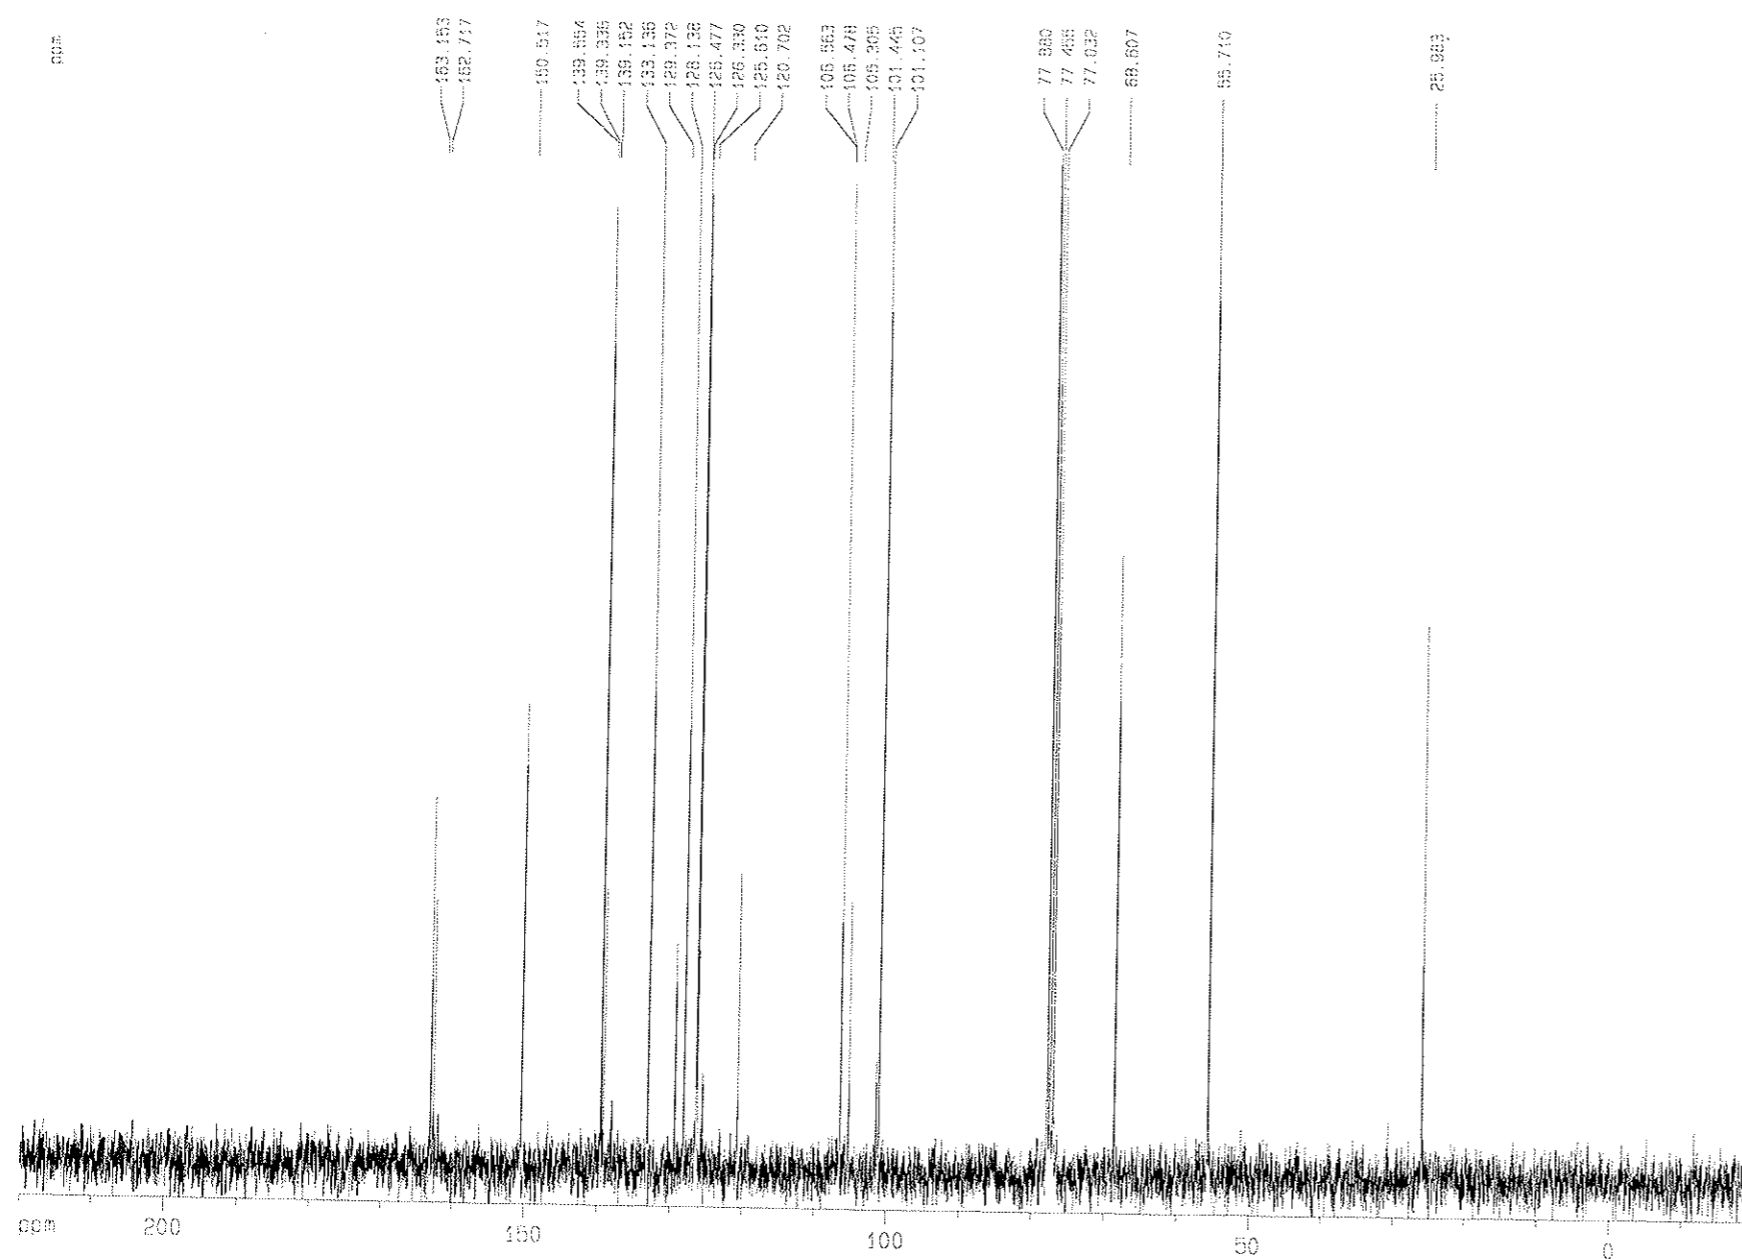

Current Data Parameters  
NAME J21  
EXPNO 575  
PROCNO 1

F2 - Acquisition Parameters  
Date\_ 20040813  
Time 13.33  
INSTRUM test  
PROBHD 5 mm Multinuc1  
PULPROG zgpg30  
TD 35968  
SOLVENT CDCl3  
NS 256  
DS 4  
SWH 24038.461 Hz  
FIDRES 0.668329 Hz  
AQ 0.7482652 sec  
RG 32  
DX 20.000 usec  
DE 6.00 usec  
TE 300.0 K  
D1 1.25000000 sec  
d11 0.03000000 sec  
d12 0.00002000 sec

\*\*\*\*\* CHANNEL f1 \*\*\*\*\*  
NUC1 13C  
P1 7.20 usec  
PL1 1.00 dB  
SFO1 75.4752653 MHz

\*\*\*\*\* CHANNEL f2 \*\*\*\*\*  
CPDPRG2 waltz16  
NUC2 1H  
PCPD2 84.00 usec  
PL2 2.00 dB  
PL12 20.00 dB  
PL13 20.00 dB  
SFO2 300.1342055 MHz

F2 - Processing parameters  
SI 32768  
SF 75.4677150 MHz  
WDW EM  
SSB 0  
LB 1.50 Hz  
GB 0  
PC 1.40

1D NMR plot parameters  
CX 23.00 cm  
CY 16.00 cm  
F1F 220.000 ppm  
F1 16502.90 Hz  
F2F -20.000 ppm  
F2 -1500.36 Hz  
PPMCM 10.43478 ppm  
HZCM 757.48926 Hz/1

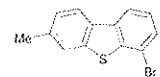

```

1D NMR plot parameters
CX          23.00 cm
CY          16.00 cm
F1P         10.000 ppm
F1          3001.30 Hz
F2P         -0.500 ppm
F2          -150.07 Hz
PPMCM       0.45652 ppm/cm
HZCM        137.01586 Hz/cm

```

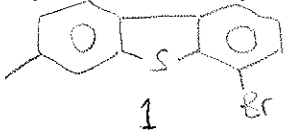

MEM52B

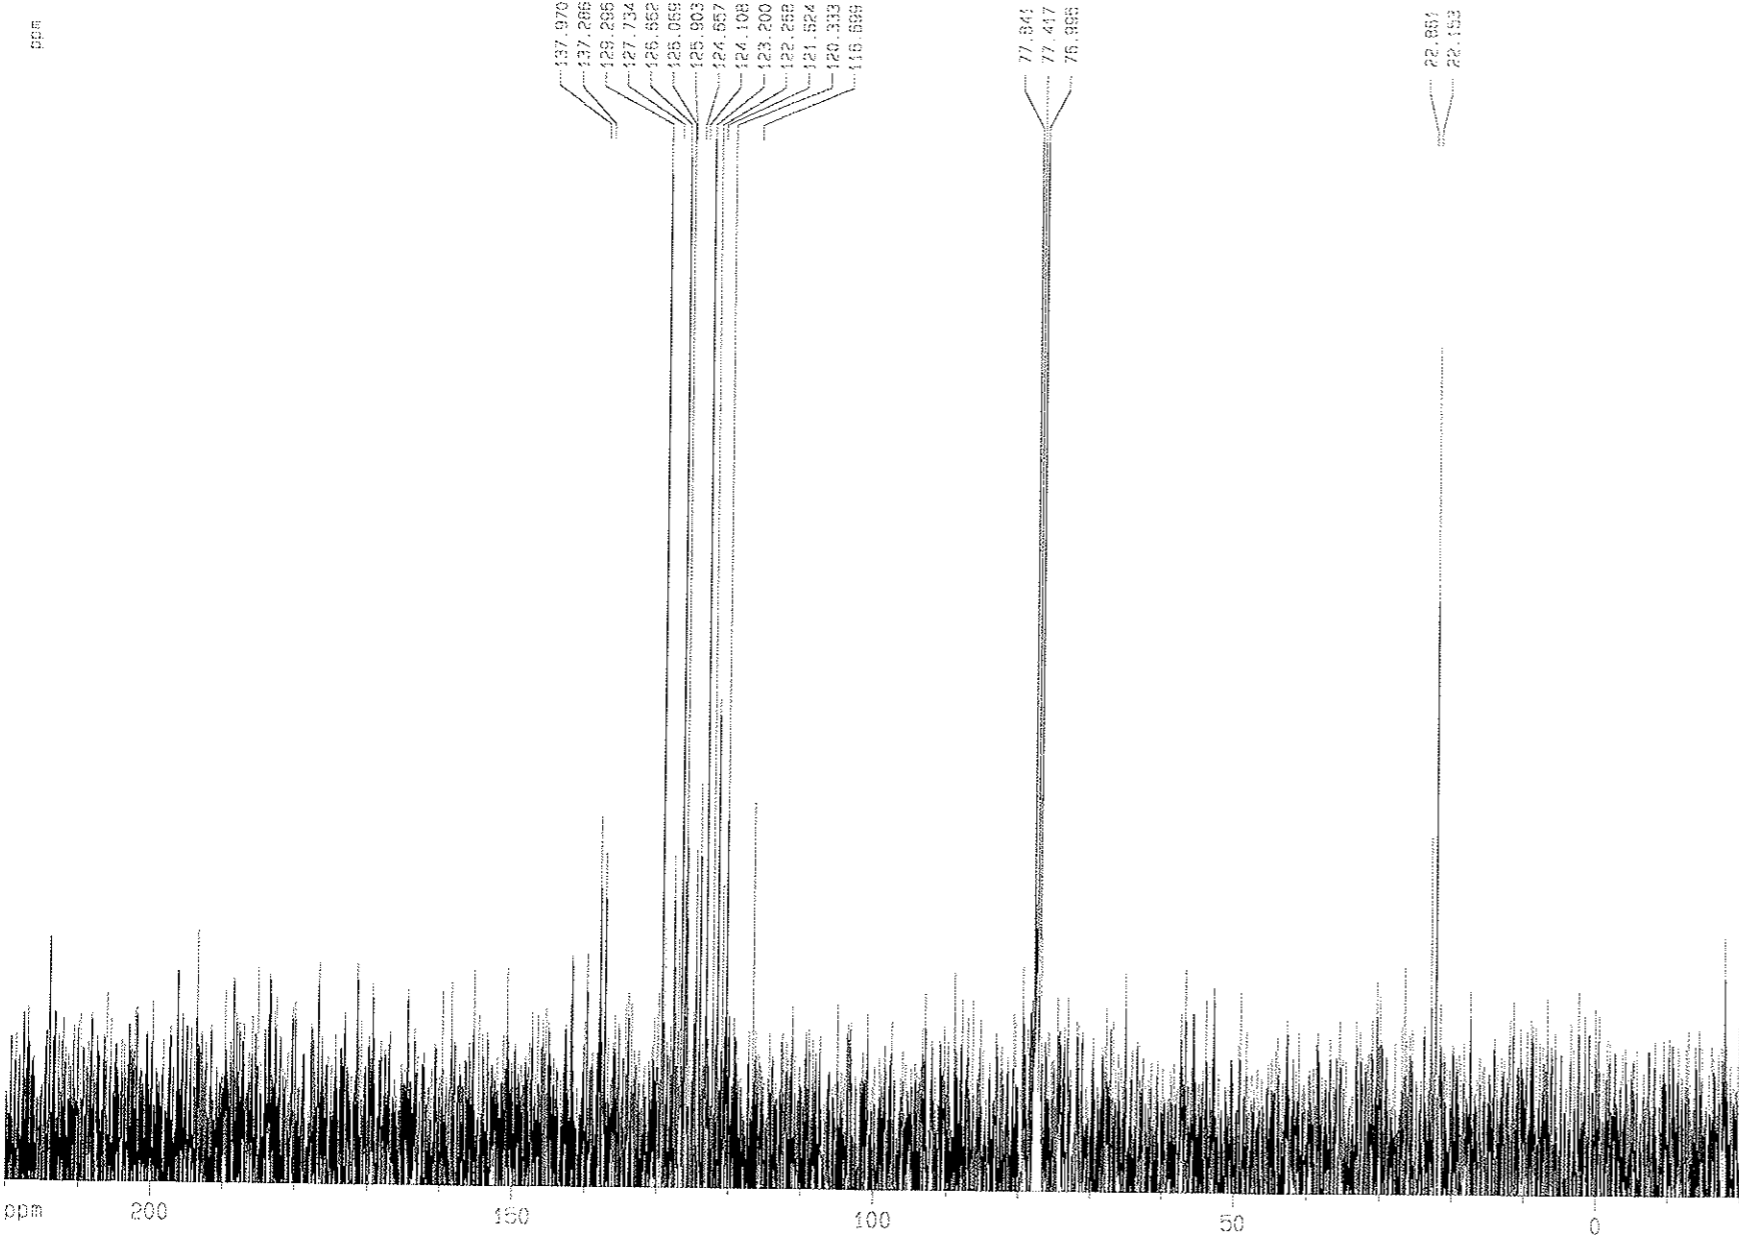

Current Data Parameters  
NAME J21  
EXPNO 570  
PROCNO 1

F2 - Acquisition Parameters  
Date\_ 20040513  
Time 13.16  
INSTRUM test  
PROBHD 5 mm Multinuc1  
PULPROG zgpg30  
TD 32768  
SOLVENT CDCl3  
NS 256  
DS 4  
SWH 24038.451 Hz  
FIDRES 0.660389 Hz  
AQ 0.7482052 sec  
RG 22.6  
DW 20.800 usec  
DE 6.00 usec  
TE 300.0 K  
S1 1.25000000 sec  
d11 0.03000000 sec  
d12 0.00000000 sec

===== CHANNEL f1 =====  
NUC1 13C  
P1 7.20 usec  
PL1 1.00 dB  
SFO1 75.4782653 MHz

===== CHANNEL f2 =====  
CPDPRG2 waltz16  
NUC2 1H  
PCPD2 84.00 usec  
PL2 2.00 dB  
PL12 20.00 dB  
PL13 20.00 dB  
SFO2 300.1312005 MHz

F2 - Processing parameters  
S1 32768  
SF 75.4677190 MHz  
WDW EM  
SSB 0  
LB 1.50 Hz  
GB 0  
PC 1.40

1D NMR plot parameters  
CX 23.00 cm  
CY 16.00 cm  
F1P 220.000 ppm  
F1 16502.50 Hz  
F2P -20.000 ppm  
F2 -1509.36 Hz  
PPMCM 10.43478 ppm  
HZCM 757.48526 Hz/1

2b

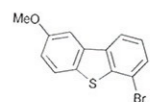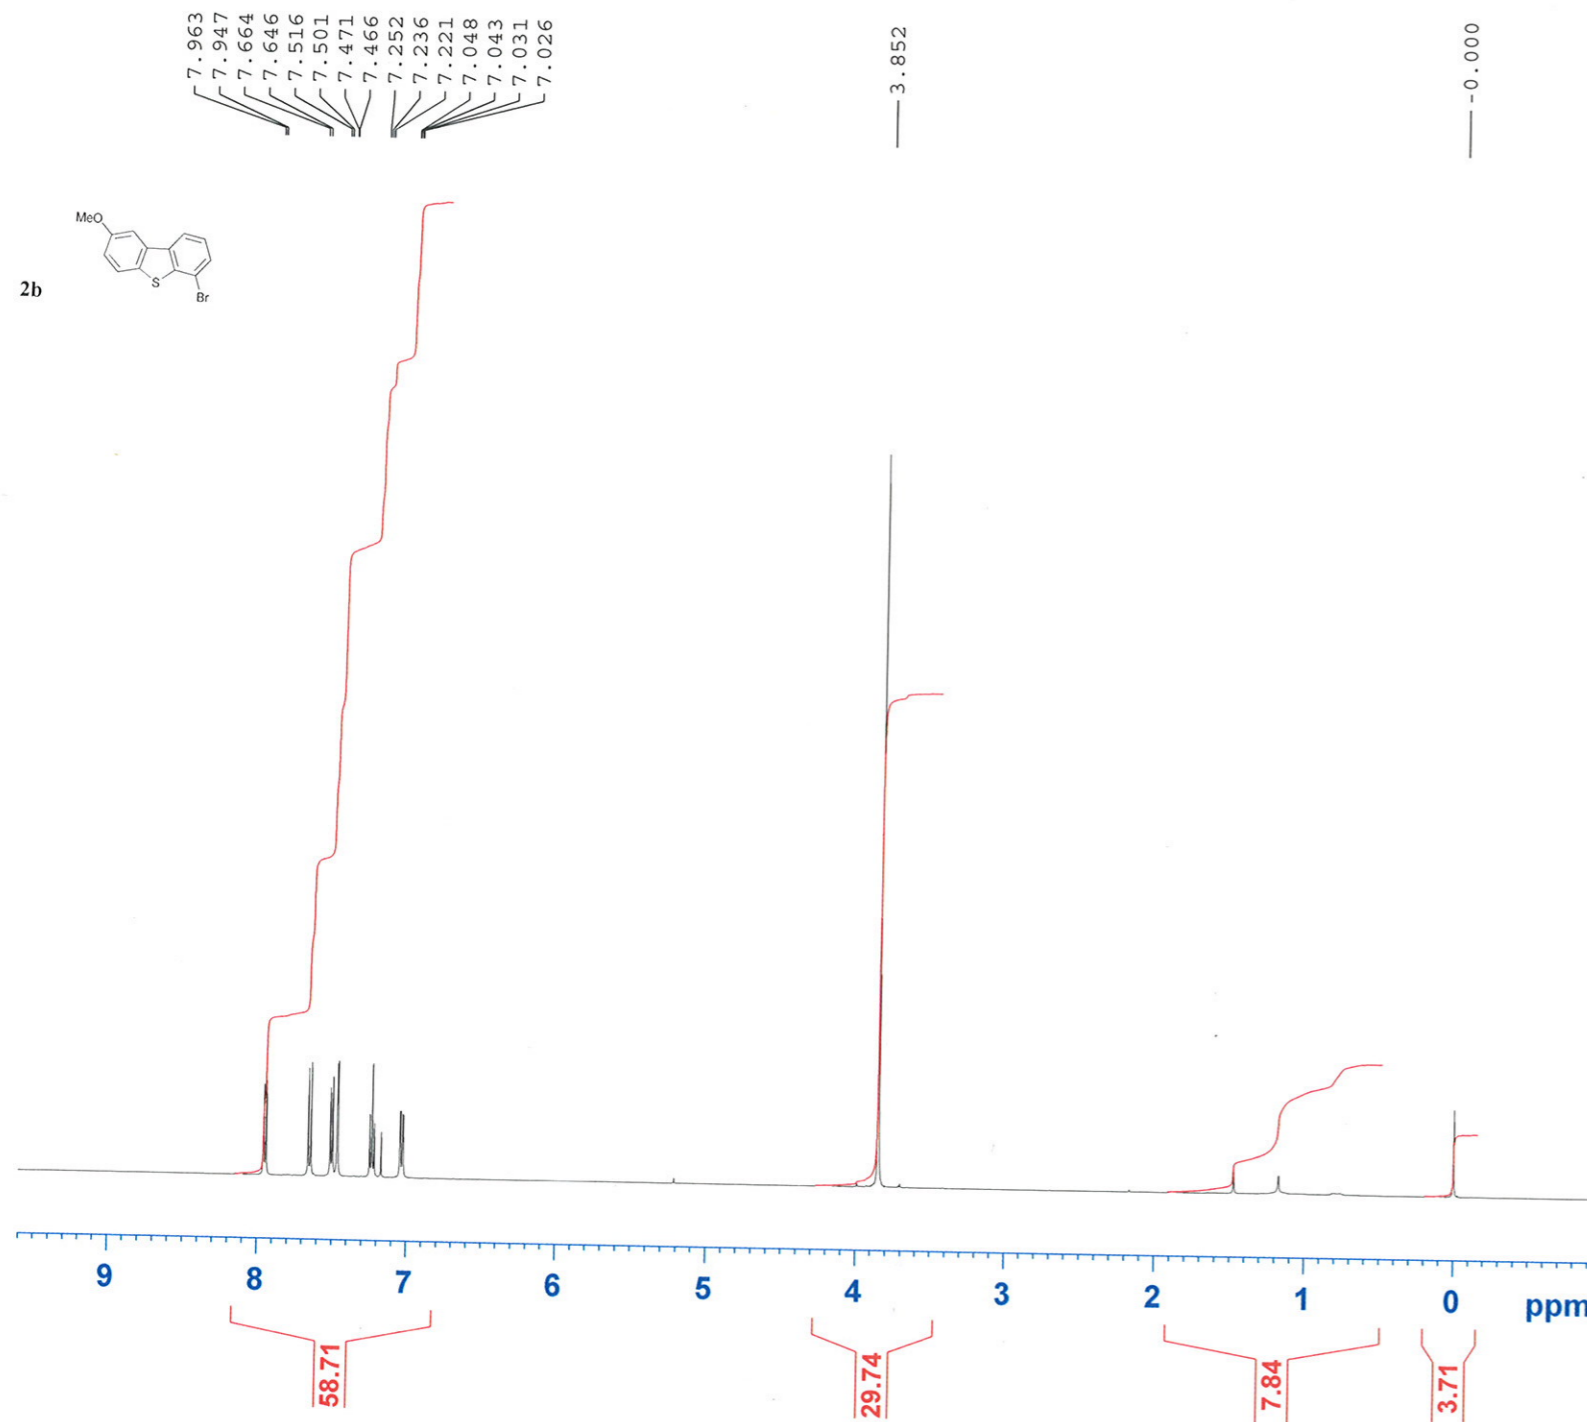

**BRUKER**

**Newcastle University**

**CANCER RESEARCH UK**

NAME KMC-386-244  
EXPNO 10  
PROCNO 1  
Date\_ 20101011  
Time\_ 11.45  
INSTRUM spect  
PROBHD 5 mm PABBO BB-  
PULPROG zg30  
TD 65536  
SOLVENT CDCl3  
NS 16  
DS 0  
SWH 10330.578 Hz  
FIDRES 0.157632 Hz  
AQ 3.1719923 sec  
RG 161  
DW 48.400 usec  
DE 12.29 usec  
TE 294.3 K  
D1 1.00000000 sec  
TD0 1

===== CHANNEL f1 =====  
NUC1 1H  
P1 14.80 usec  
PL1 1.00 dB  
PL1W 18.33646011 W  
SFO1 500.3030896 MHz  
SI 65536  
SF 500.3000562 MHz  
WDW EM  
SSB 0  
LB 0.30 Hz  
GB 0  
PC 1.00

2b

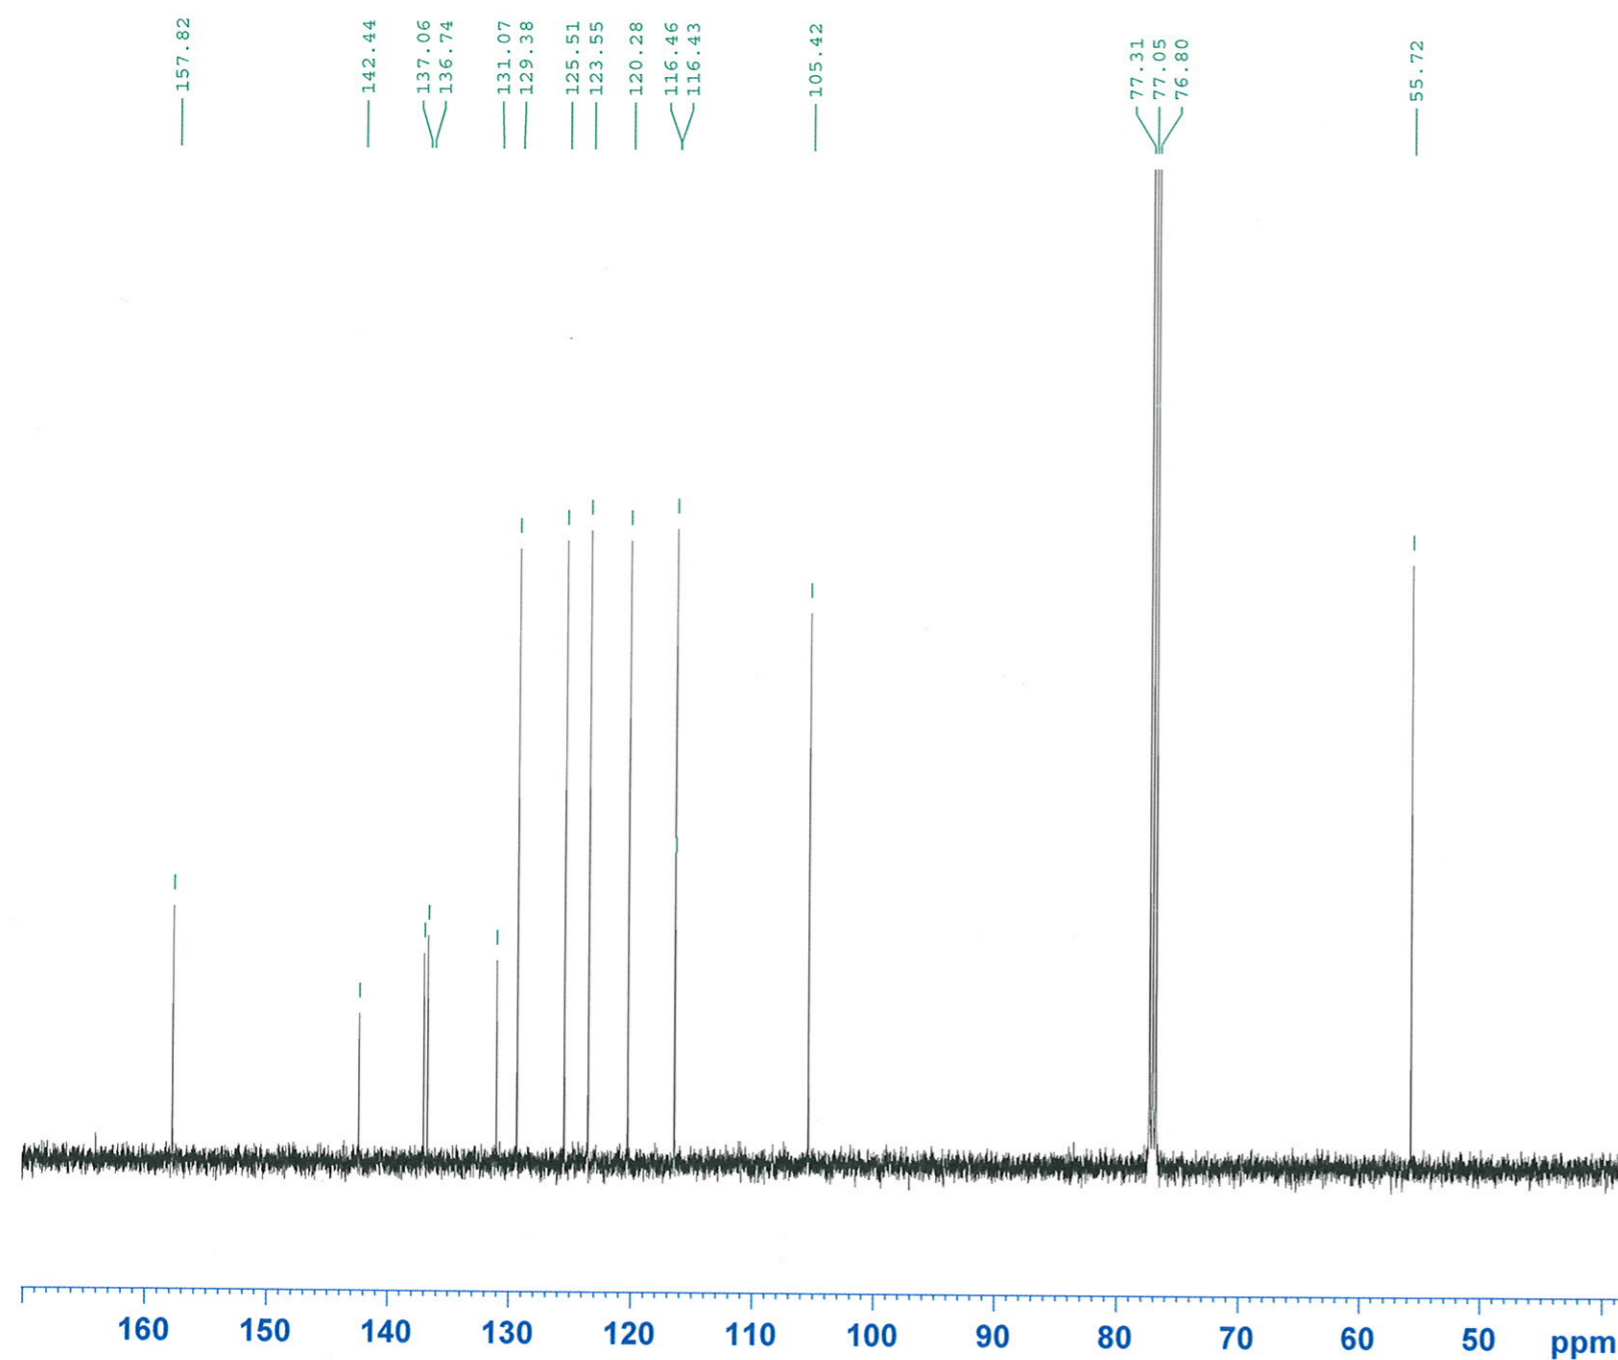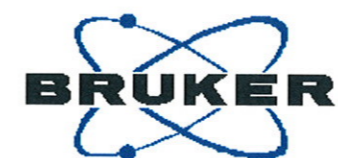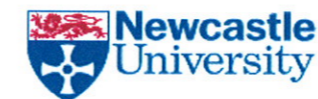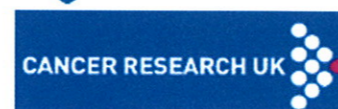

NAME KMC-386-244  
EXPNO 11  
PROCNO 1  
Date\_ 20101011  
Time\_ 12.39  
INSTRUM spect  
PROBHD 5 mm PABBO BB-  
PULPROG zgpg30  
TD 65536  
SOLVENT CDCl3  
NS 256  
DS 2  
SWH 29761.904 Hz  
FIDRES 0.454131 Hz  
AQ 1.1010548 sec  
RG 575  
DW 16.800 usec  
DE 7.83 usec  
TE 295.7 K  
D1 2.00000000 sec  
D11 0.03000000 sec  
TD0 1

===== CHANNEL f1 =====  
NUC1 13C  
P1 9.00 usec  
PL1 0.00 dB  
PL1W 82.38987732 W  
SFO1 125.8131151 MHz

===== CHANNEL f2 =====  
CPDPRG2 waltz16  
NUC2 1H  
PCPD2 80.00 usec  
PL2 1.00 dB  
PL12 17.00 dB  
PL13 21.00 dB  
PL2W 18.33646011 W  
PL12W 0.46059108 W  
PL13W 0.18336460 W  
SFO2 500.3020012 MHz  
SI 65536  
SF 125.8005350 MHz  
WDW EM  
SSB 0  
LB 1.00 Hz  
GB 0  
PC 1.40

sr98c ac

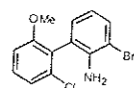

3-bromo-2'-chloro-6'-methoxy-[1,1'-biphenyl]-2-amine (11a)

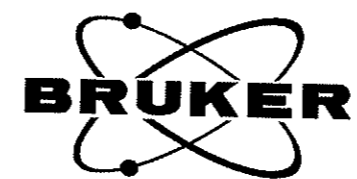

Current Data Parameters  
NAME sr98c  
EXPNO 1  
PROCNO 1

F2 - Acquisition Parameters  
Date\_ 20051215  
Time\_ 13.16  
INSTRUM spect  
PROBHD 5 mm Multinucl  
PULPROG zg30  
TD 32768  
SOLVENT CDCl3  
NS 32  
DS 2  
SWH 6188.119 Hz  
FIDRES 0.188846 Hz  
AQ 2.6477852 sec  
RG 45.3  
DW 80.800 usec  
DE 6.00 usec  
TE 292.5 K  
D1 1.00000000 sec  
MCREST 0.00000000 sec  
MCWRK 0.01500000 sec

===== CHANNEL f1 =====  
NUC1 1H  
P1 10.00 usec  
PL1 2.00 dB  
SFO1 300.1318534 MHz

F2 - Processing parameters  
SI 32768  
SF 300.1300000 MHz  
WDW EM  
SSB 0  
LB 0.30 Hz  
GB 0  
PC 4.00

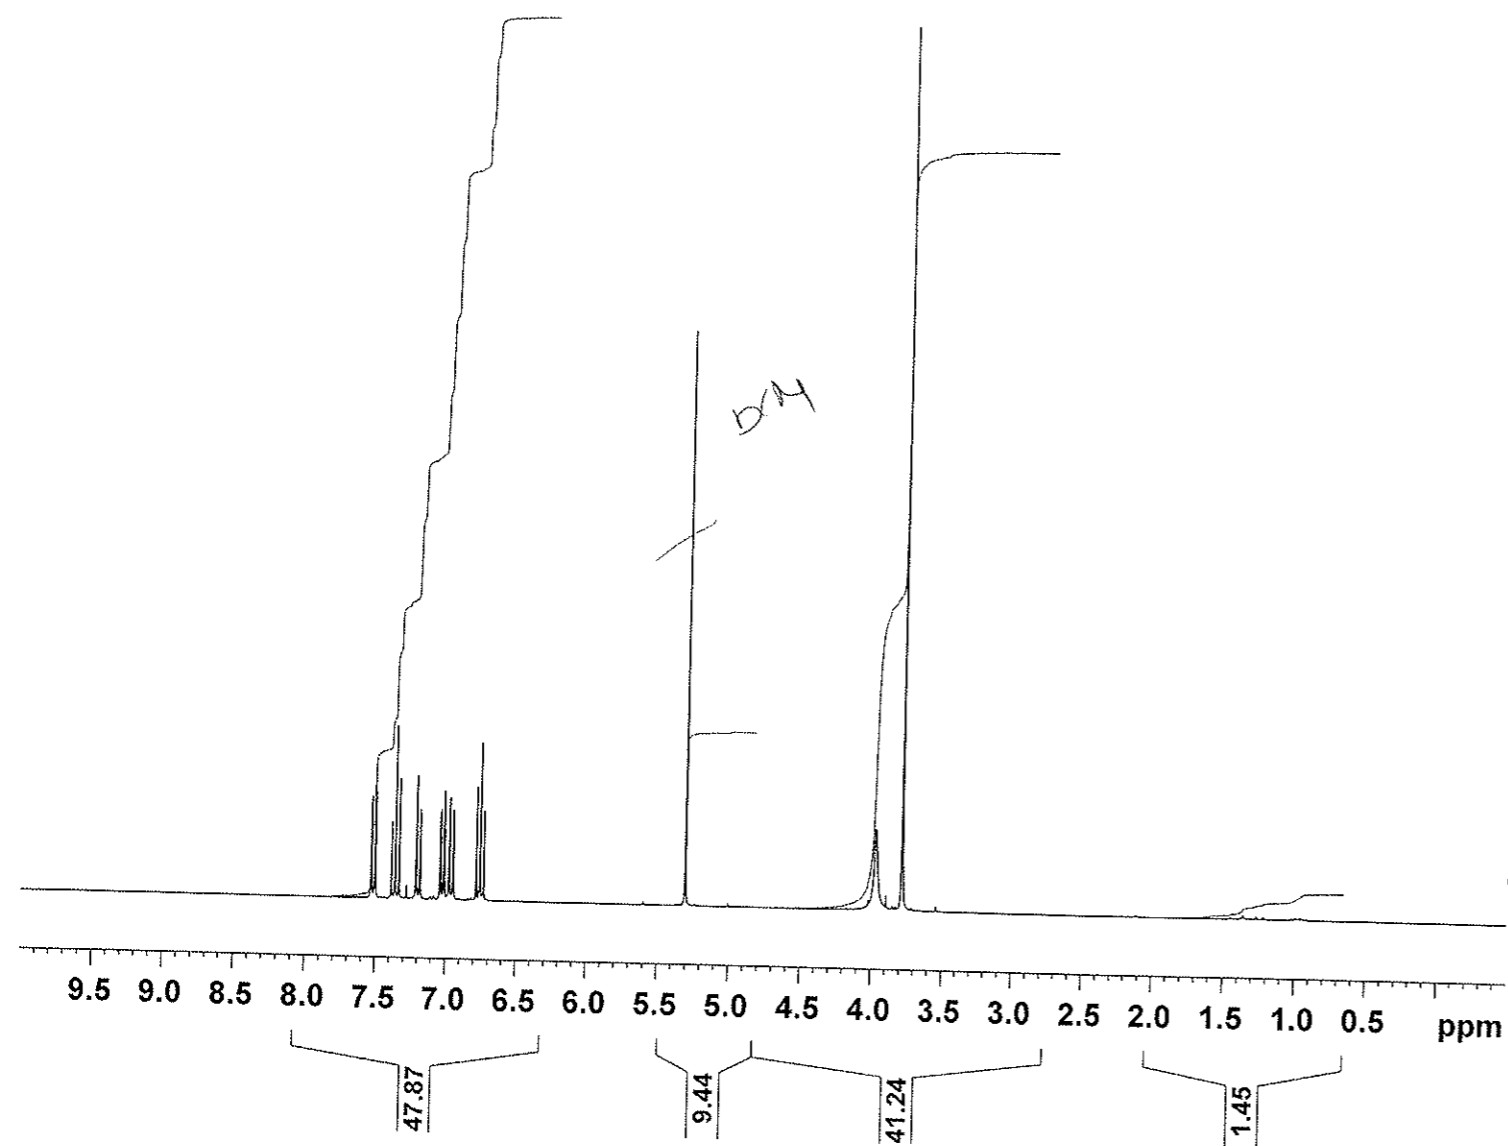

sr98a ac

11a.

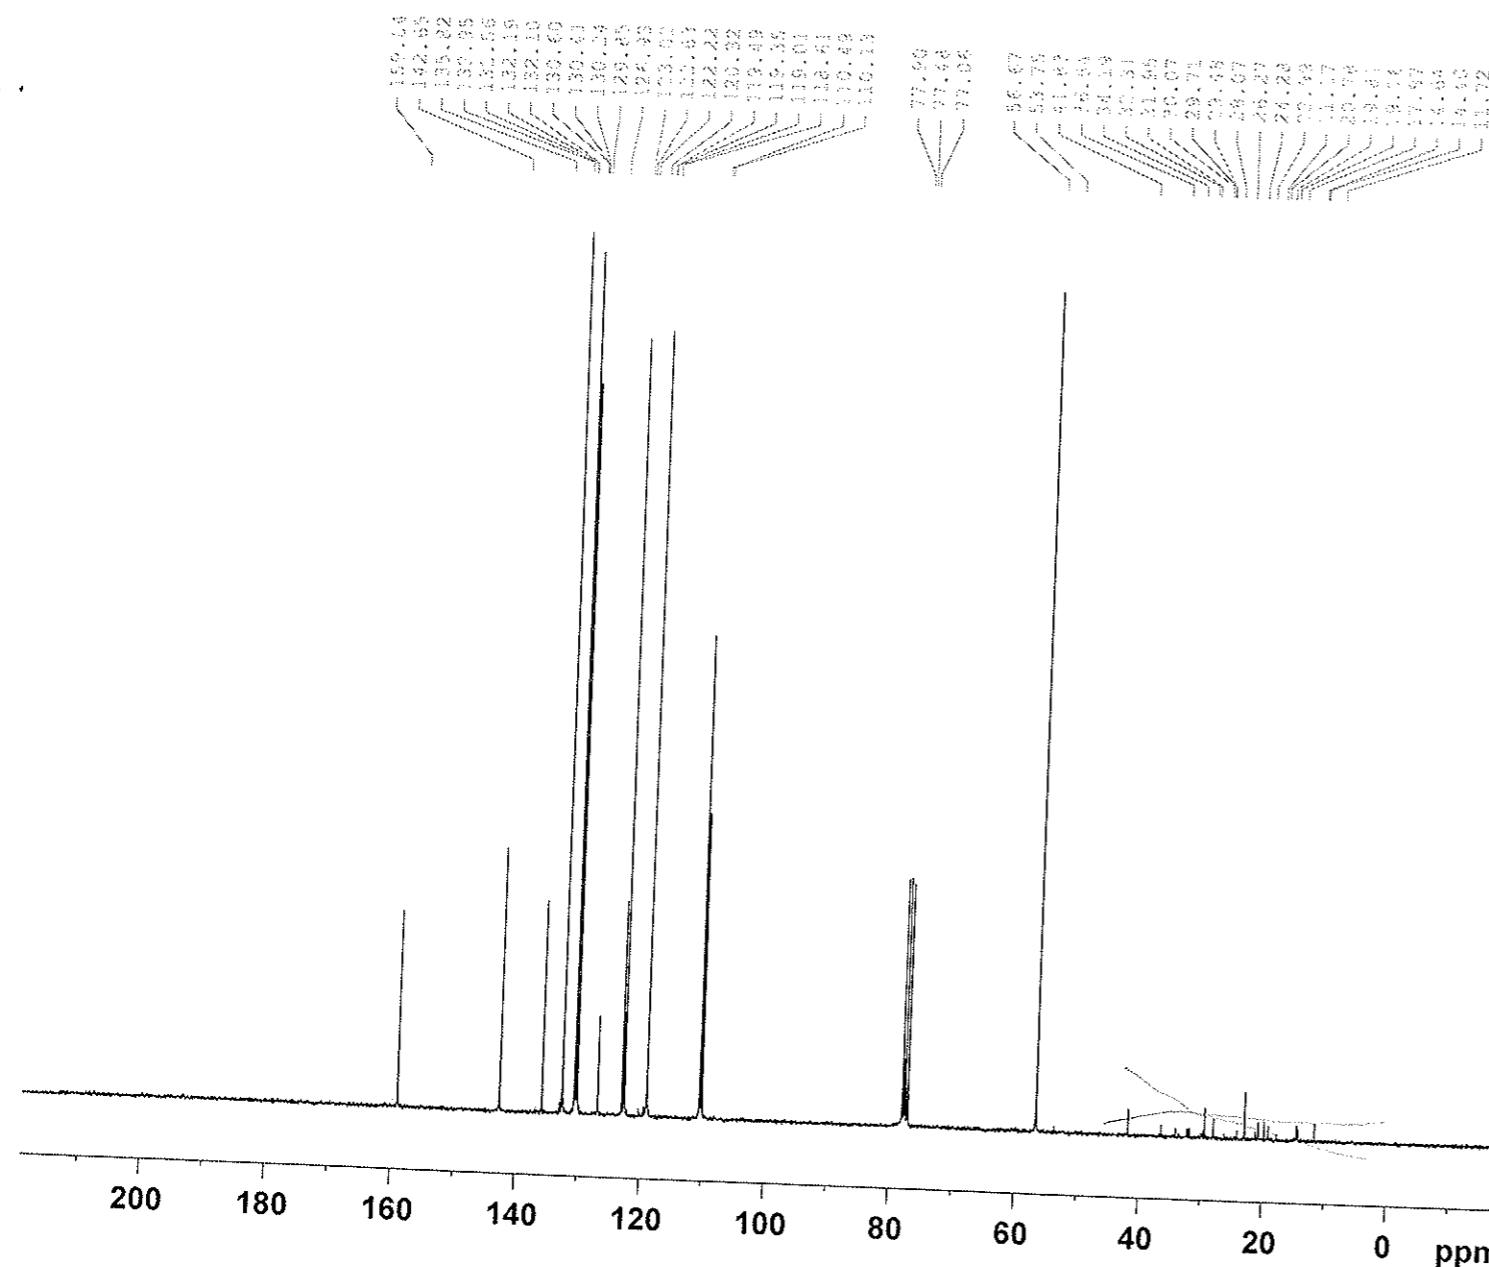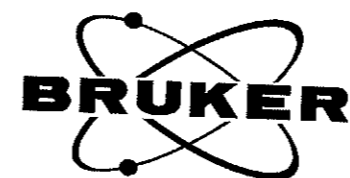

Current Data Parameters  
NAME sr98a  
EXPNO 2  
PROCNO 1

F2 - Acquisition Parameters  
Date\_ 20051116  
Time 21.11  
INSTRUM spect  
PROBHD 5 mm Multinucl  
PULPROG zgpg30  
TD 35968  
SOLVENT CDCl3  
NS 3600  
DS 4  
SWH 17985.611 Hz  
FIDRES 0.500045 Hz  
AQ 0.9999882 sec  
RG 2048  
DW 27.800 usec  
DE 6.00 usec  
TE 306.5 K  
D1 1.00000000 sec  
d11 0.03000000 sec  
DELTA 0.89999998 sec  
MCREST 0.00000000 sec  
MCWRK 0.01500000 sec

===== CHANNEL f1 =====  
NUC1 13C  
P1 7.20 usec  
PL1 1.00 dB  
SFO1 75.4752653 MHz

===== CHANNEL f2 =====  
CPDPRG2 waltz16  
NUC2 1H  
PCPD2 10.00 usec  
PL2 2.00 dB  
PL12 2.00 dB  
PL13 120.00 dB  
SFO2 300.1312005 MHz

F2 - Processing parameters  
SI 32768  
SF 75.4677190 MHz  
WDW EM  
SSB 0  
LB 1.50 Hz  
GB 0  
PC 1.40

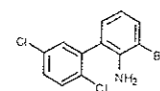

sr63 mw e ac 41-43

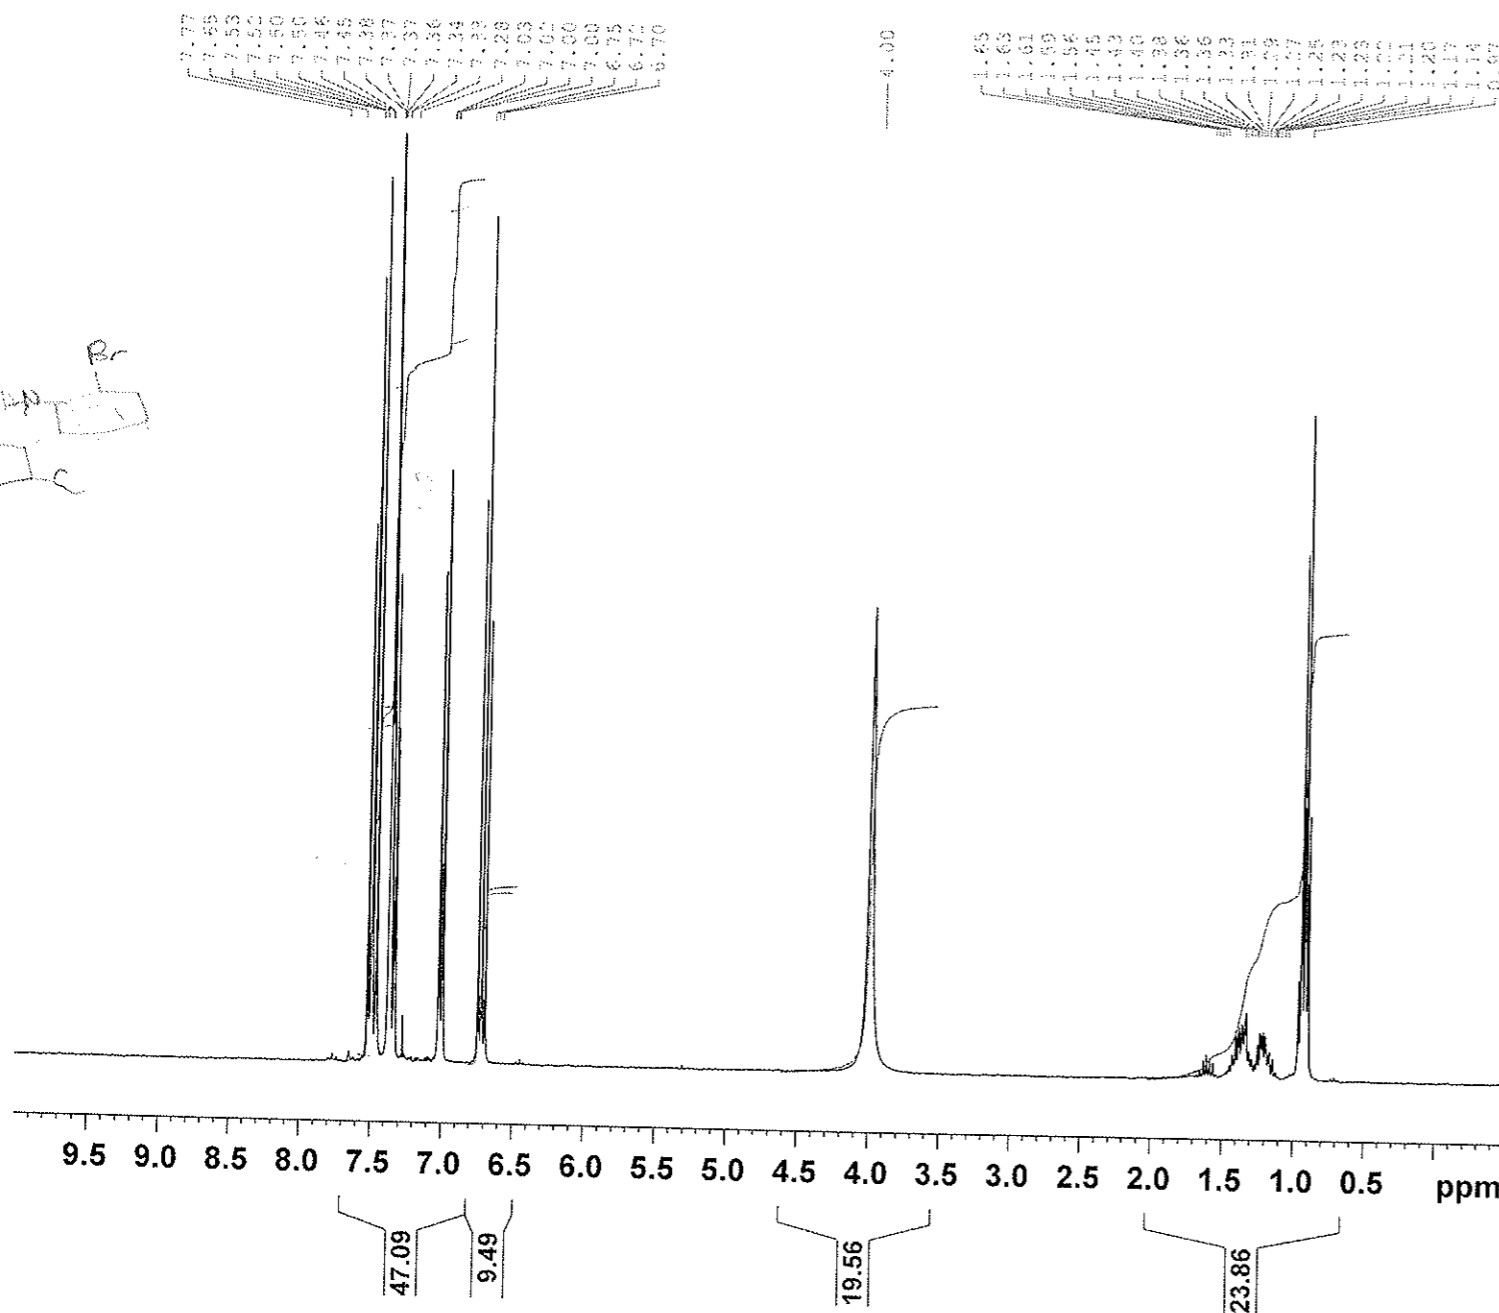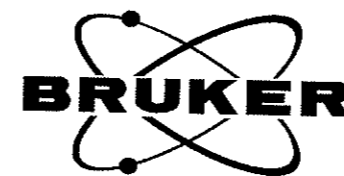

Current Data Parameters  
 NAME J19  
 EXPNO 1700  
 PROCNO 1

F2 - Acquisition Parameters  
 Date\_ 20050818  
 Time\_ 15.58  
 INSTRUM spect  
 PROBHD 5 mm Multinucl  
 PULPROG zg30  
 TD 32768  
 SOLVENT CDCl3  
 NS 8  
 DS 0  
 SWH 6188.119 Hz  
 FIDRES 0.188846 Hz  
 AQ 2.6477852 sec  
 RG 50.8  
 DW 80.800 usec  
 DE 6.00 usec  
 TE 296.6 K  
 D1 1.00000000 sec  
 MCREST 0.00000000 sec  
 MCWRK 0.01500000 sec

===== CHANNEL f1 =====  
 NUC1 1H  
 P1 10.00 usec  
 PL1 2.00 dB  
 SFO1 300.1318534 MHz

F2 - Processing parameters  
 SI 32768  
 SF 300.1300000 MHz  
 WDW EM  
 SSB 0  
 LB 0.30 Hz  
 GB 0  
 PC 4.00

sr92b ac

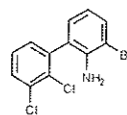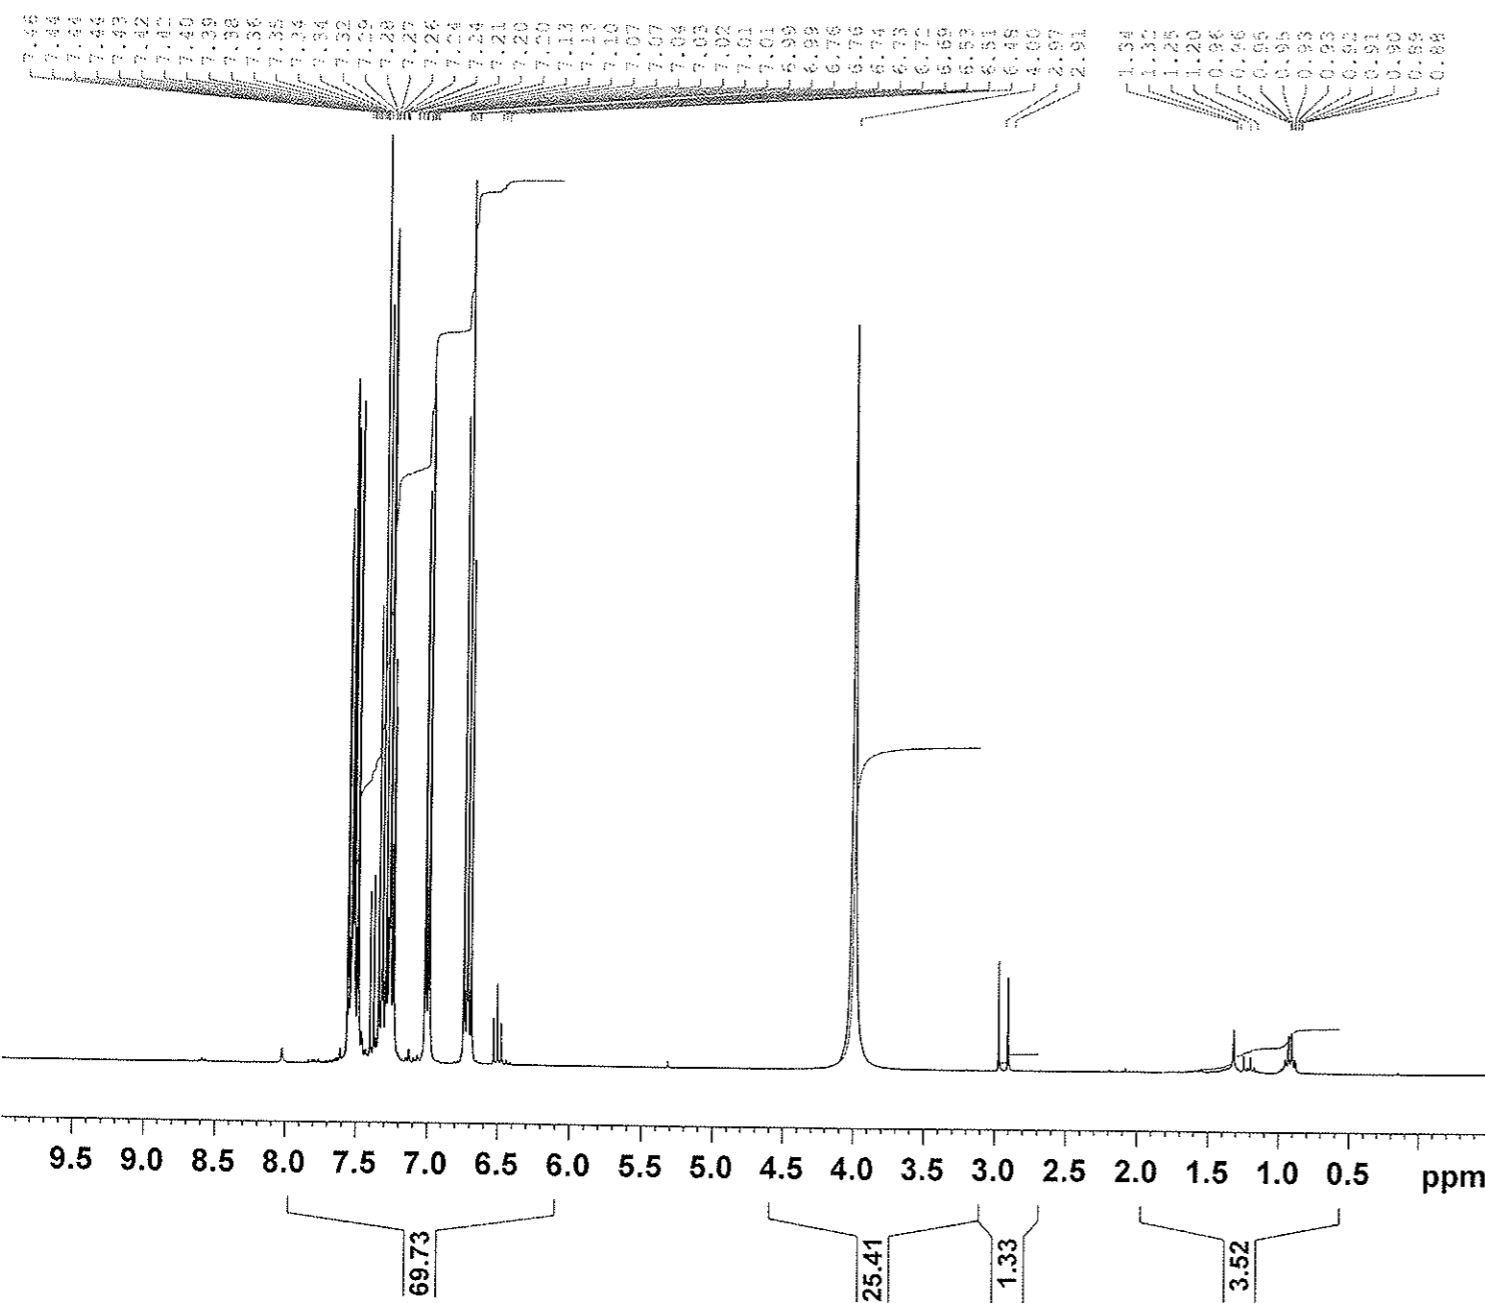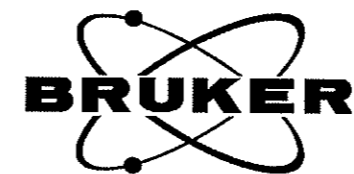

Current Data Parameters  
NAME sr92b  
EXPNO 1  
PROCNO 1

F2 - Acquisition Parameters  
Date\_ 20060130  
Time 18.03  
INSTRUM spect  
PROBHD 5 mm Multinucl  
PULPROG zg30  
TD 32768  
SOLVENT CDCl3  
NS 32  
DS 2  
SWH 6188.119 Hz  
FIDRES 0.188846 Hz  
AQ 2.6477852 sec  
RG 80.6  
DW 80.800 usec  
DE 6.00 usec  
TE 300.0 K  
D1 1.00000000 sec  
MCREST 0.00000000 sec  
MCWRK 0.01500000 sec

===== CHANNEL f1 =====  
NUC1 1H  
P1 10.00 usec  
PL1 2.00 dB  
SFO1 300.1318534 MHz

F2 - Processing parameters  
SI 32768  
SF 300.1300000 MHz  
WDW EM  
SSB 0  
LB 0.30 Hz  
GB 0  
PC 4.00

3-Bromo-2'-chloro-6'-methoxy-2-thiocyanato-1,1'-biphenyl (12a)

sr99d ac

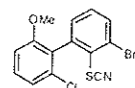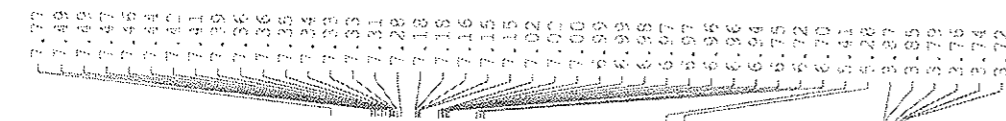

1.04  
0.94  
0.92

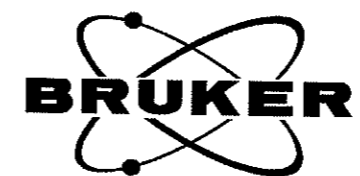

Current Data Parameters  
NAME sr99d  
EXPNO 1  
PROCNO 1

F2 - Acquisition Parameters  
Date\_ 20051219  
Time 12.34  
INSTRUM spect  
PROBHD 5 mm Multinucl  
PULPROG zg30  
TD 32768  
SOLVENT CDCl3  
NS 32  
DS 2  
SWH 6188.119 Hz  
FIDRES 0.188846 Hz  
AQ 2.6477852 sec  
RG 35.9  
DW 80.800 usec  
DE 6.00 usec  
TE 292.9 K  
D1 1.00000000 sec  
MCREST 0.00000000 sec  
MCWRK 0.01500000 sec

===== CHANNEL f1 =====  
NUC1 1H  
P1 10.00 usec  
PL1 2.00 dB  
SFO1 300.1318534 MHz

F2 - Processing parameters  
SI 32768  
SF 300.1300000 MHz  
WDW EM  
SSB 0  
LB 0.30 Hz  
GB 0  
PC 4.00

9.5 9.0 8.5 8.0 7.5 7.0 6.5 6.0 5.5 5.0 4.5 4.0 3.5 3.0 2.5 2.0 1.5 1.0 0.5 ppm

61.35

4.06

32.08

2.51

sr131b ac

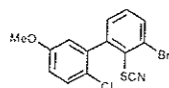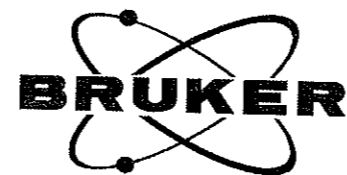

Current Data Parameters  
NAME sr131b  
EXPNO 1  
PROCNO 1

F2 - Acquisition Parameters  
Date\_ 20060531  
Time\_ 0.50  
INSTRUM spect  
PROBHD 5 mm Multinucl  
PULPROG zg30  
TD 32768  
SOLVENT CDCl3  
NS 8  
DS 0  
SWH 6188.119 Hz  
FIDRES 0.188846 Hz  
AQ 2.6477852 sec  
RG 101.6  
DW 80.800 usec  
DE 6.00 usec  
TE 293.5 K  
D1 1.00000000 sec  
MCREST 0.00000000 sec  
MCWRK 0.01500000 sec

===== CHANNEL f1 =====  
NUC1 1H  
P1 10.00 usec  
PL1 2.00 dB  
SFO1 300.1318534 MHz

F2 - Processing parameters  
SI 32768  
SF 300.1300000 MHz  
WDW EM  
SSB 0  
LB 0.30 Hz  
GB 0  
PC 4.00

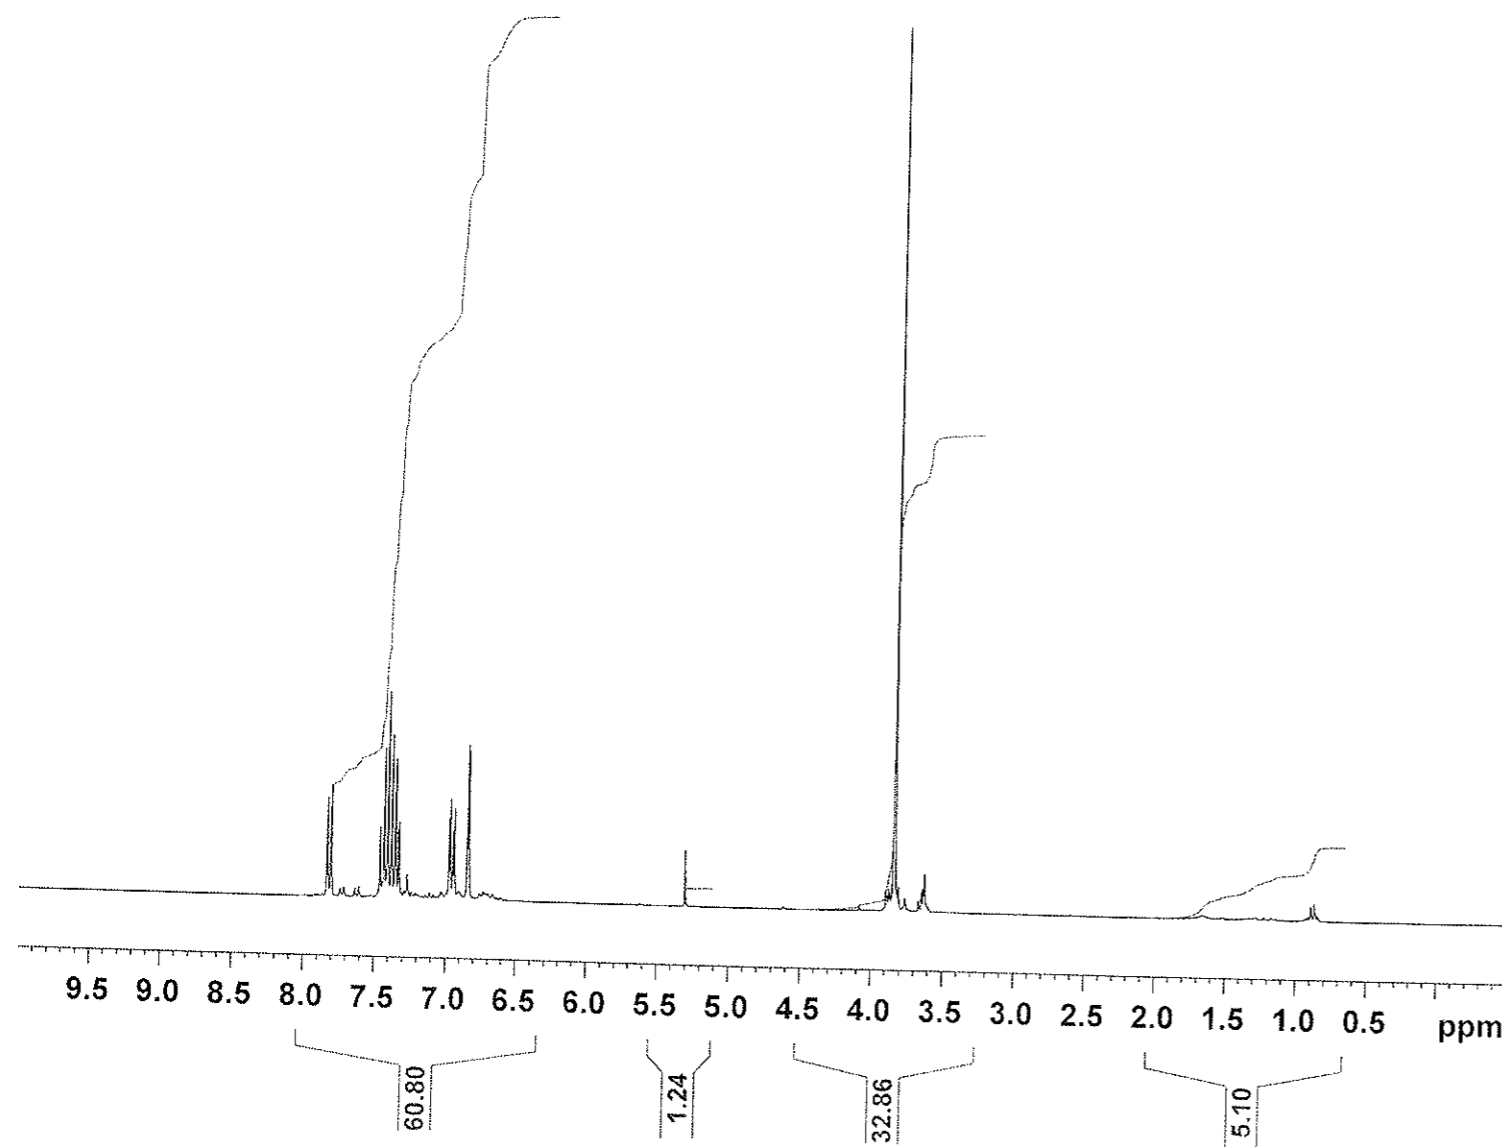

SR84 RECRY

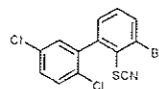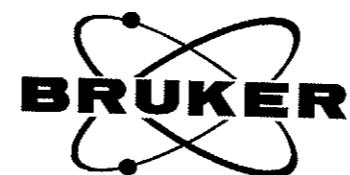

Current Data Parameters  
NAME J19  
EXPNO 1740  
PROCNO 1

F2 - Acquisition Parameters  
Date\_ 20050830  
Time\_ 9.47  
INSTRUM spect  
PROBHD 5 mm Multinucl  
PULPROG zg30  
TD 32768  
SOLVENT CDCl3  
NS 32  
DS 2  
SWH 6188.119 Hz  
FIDRES 0.188846 Hz  
AQ 2.6477852 sec  
RG 181  
DW 80.800 usec  
DE 6.00 usec  
TE 292.9 K  
D1 1.00000000 sec  
MCREST 0.00000000 sec  
MCWRK 0.01500000 sec

===== CHANNEL f1 =====  
NUC1 1H  
P1 10.00 usec  
PL1 2.00 dB  
SFO1 300.1318534 MHz

F2 - Processing parameters  
SI 32768  
SF 300.1300290 MHz  
WDW EM  
SSB 0  
LB 0.30 Hz  
GB 0  
PC 4.00

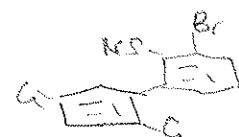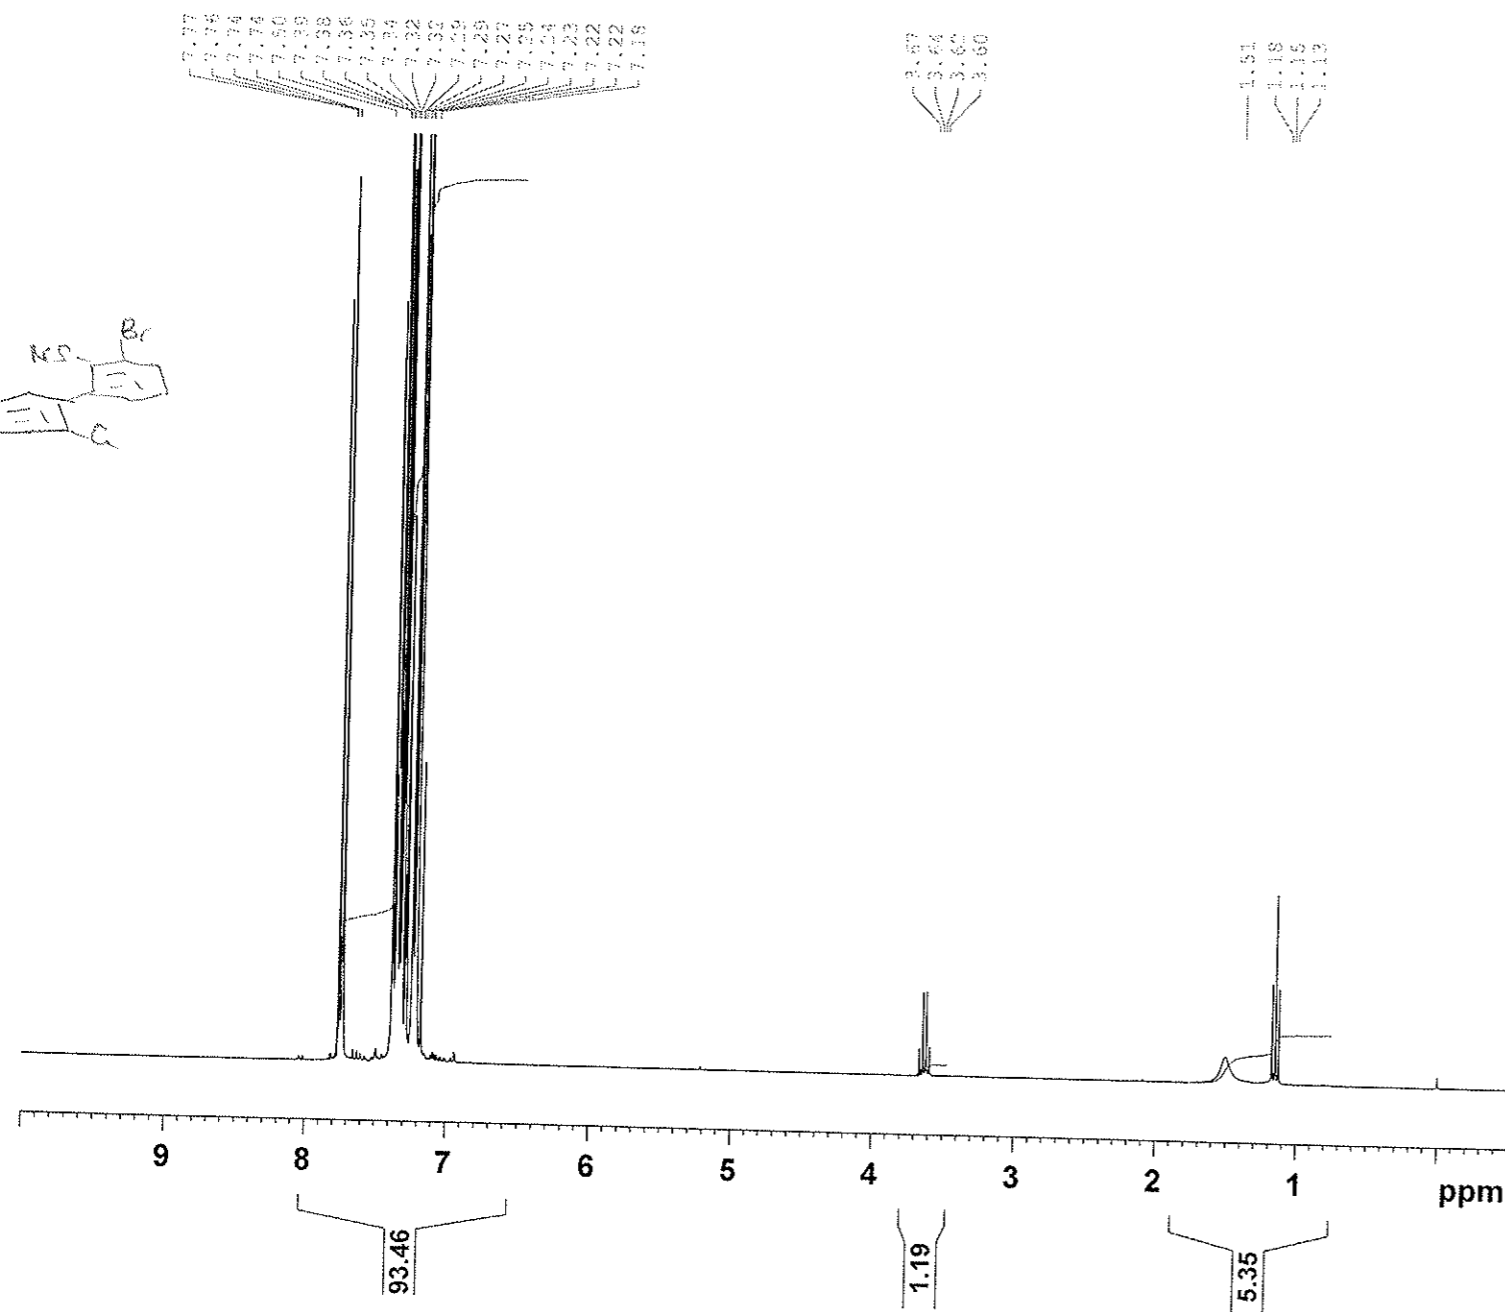

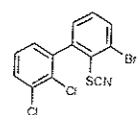

sr104b ac

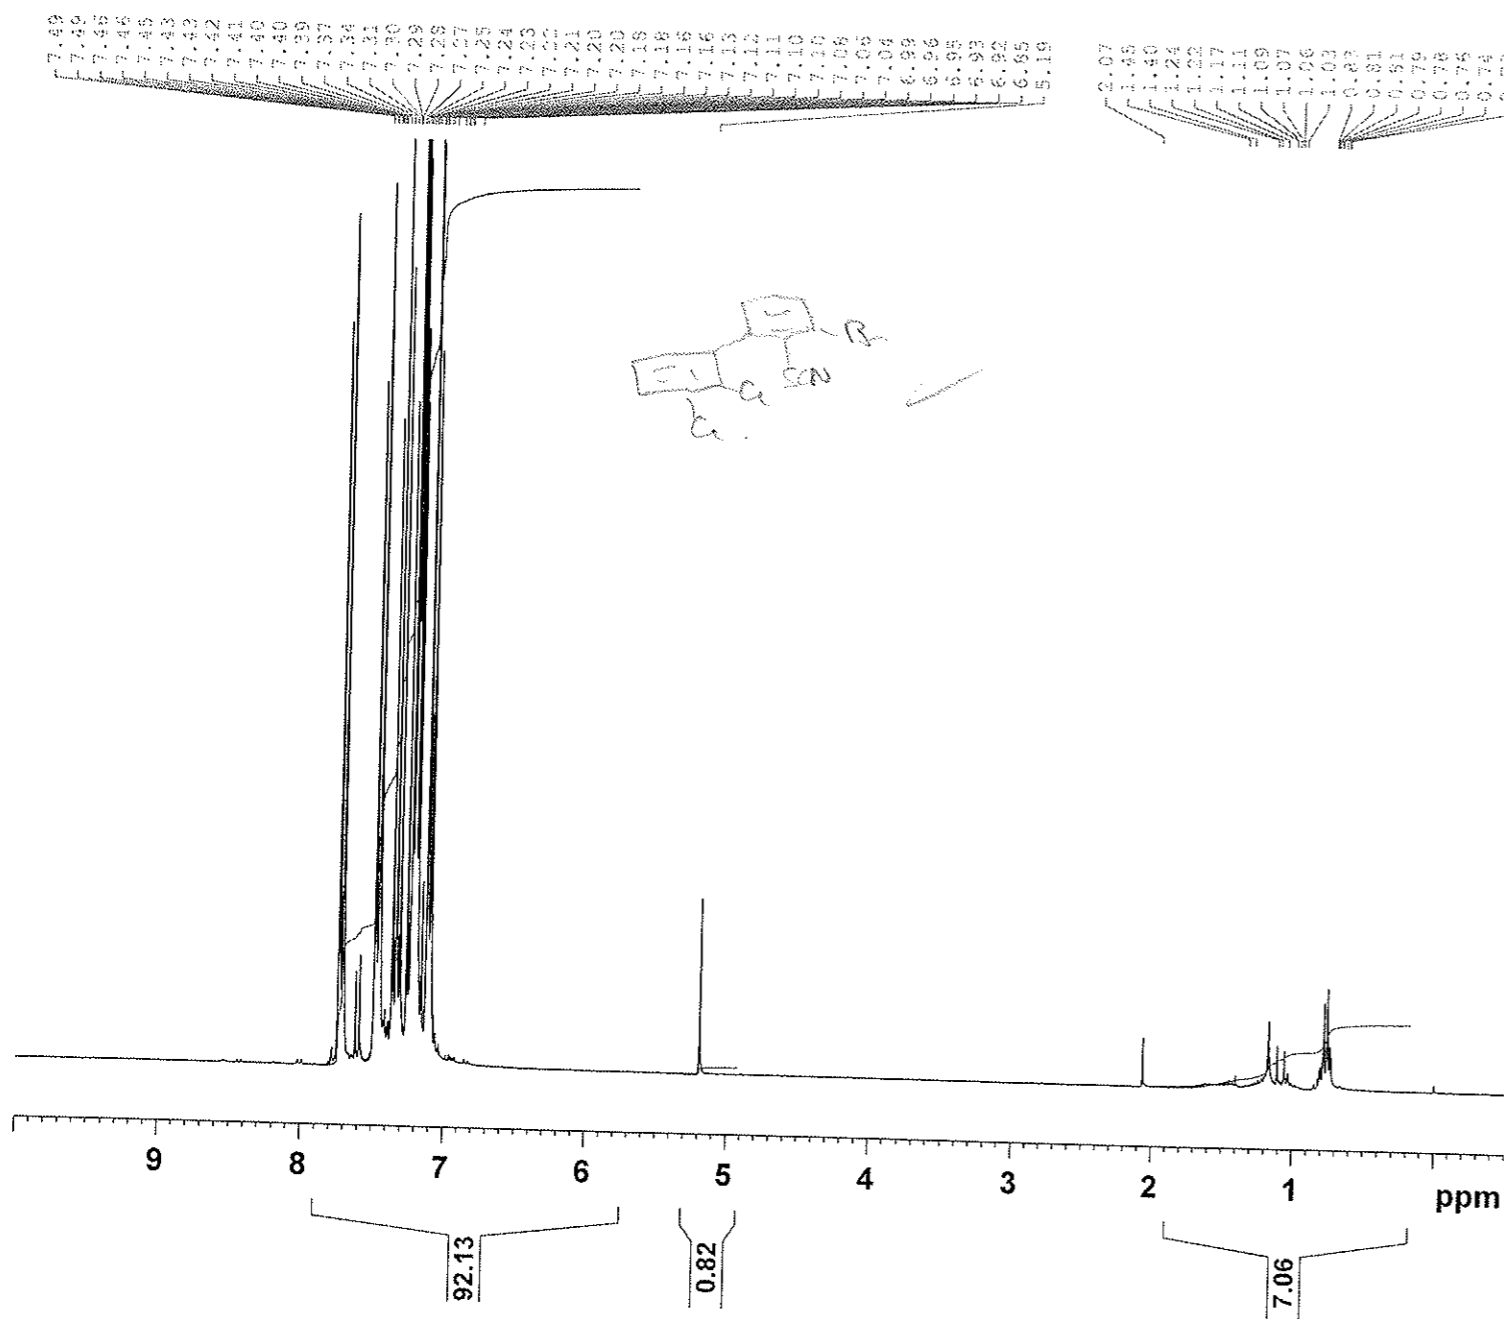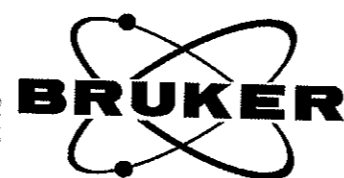

Current Data Parameters  
NAME sr104b  
EXPNO 1  
PROCNO 1

F2 - Acquisition Parameters  
Date\_ 20060202  
Time\_ 13.43  
INSTRUM spect  
PROBHD 5 mm Multinucl  
PULPROG zg30  
TD 32768  
SOLVENT C6D6  
NS 8  
DS 0  
SWH 6188.119 Hz  
FIDRES 0.188846 Hz  
AQ 2.6477852 sec  
RG 114  
DW 80.800 usec  
DE 6.00 usec  
TE 300.0 K  
D1 1.00000000 sec  
MCREST 0.00000000 sec  
MCWRK 0.01500000 sec

===== CHANNEL f1 =====  
NUC1 1H  
P1 10.00 usec  
PL1 2.00 dB  
SFO1 300.1318534 MHz

F2 - Processing parameters  
SI 32768  
SF 300.1300471 MHz  
WDW EM  
SSB 0  
LB 0.30 Hz  
GB 0  
PC 4.00

3-Bromo-2'-chloro-6'-methoxy-[1,1'-biphenyl]-2-thiol (13a)

sr101b

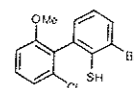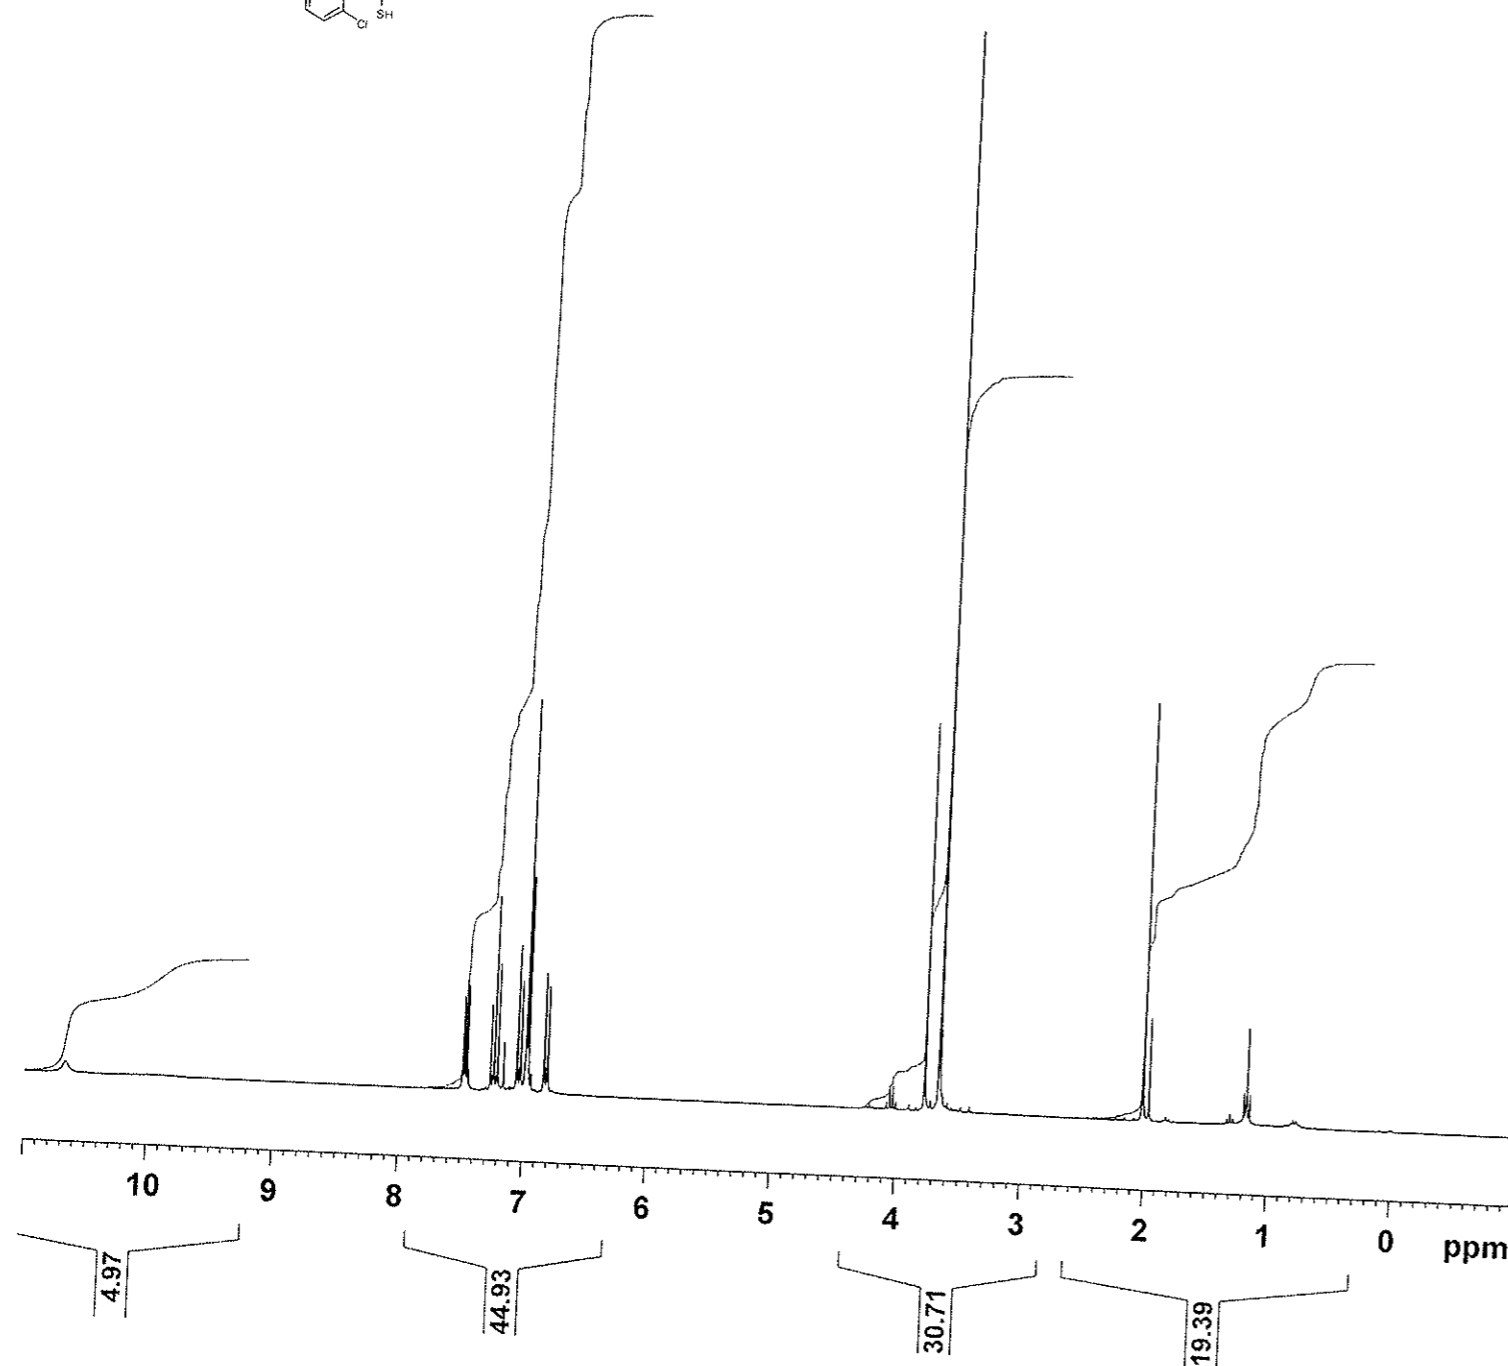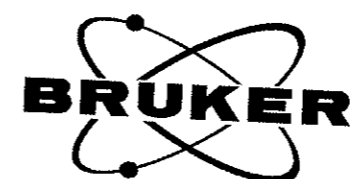

Current Data Parameters  
NAME sr101b  
EXPNO 2  
PROCNO 1

F2 - Acquisition Parameters  
Date\_ 20051129  
Time\_ 16.37  
INSTRUM spect  
PROBHD 5 mm Multinucl  
PULPROG zg30  
TD 65536  
SOLVENT CDCl3  
NS 16  
DS 2  
SWH 6188.119 Hz  
FIDRES 0.094423 Hz  
AQ 5.2954397 sec  
RG 101.6  
DW 80.800 usec  
DE 6.00 usec  
TE 291.3 K  
D1 1.00000000 sec  
MCREST 0.00000000 sec  
MCWRK 0.01500000 sec

===== CHANNEL f1 =====  
NUC1 1H  
P1 10.00 usec  
PL1 2.00 dB  
SFO1 300.1318534 MHz

F2 - Processing parameters  
SI 32768  
SF 300.1300355 MHz  
WDW EM  
SSB 0  
LB 0.30 Hz  
GB 0  
PC 1.00

3-Bromo-2'-chloro-5'-methoxy-[1,1'-biphenyl]-2-thiol (13b)

sr132a

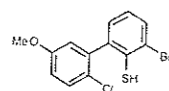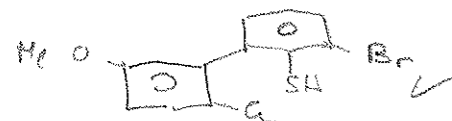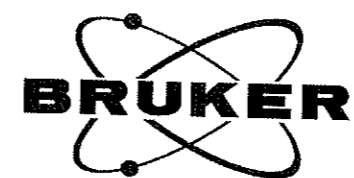

Current Data Parameters  
NAME sr132a  
EXPNO 3  
PROCNO 1

F2 - Acquisition Parameters  
Date\_ 20060511  
Time 17.00  
INSTRUM spect  
PROBHD 5 mm Multinucl  
PULPROG zg30  
TD 32768  
SOLVENT CDCl3  
NS 8  
DS 0  
SWH 6188.119 Hz  
FIDRES 0.188846 Hz  
AQ 2.6477852 sec  
RG 80.6  
DW 80.800 usec  
DE 6.00 usec  
TE 295.1 K  
D1 1.00000000 sec  
MCREST 0.00000000 sec  
MCWRK 0.01500000 sec

===== CHANNEL f1 =====  
NUC1 1H  
P1 10.00 usec  
PL1 2.00 dB  
SFO1 300.1318534 MHz

F2 - Processing parameters  
SI 32768  
SF 300.1300000 MHz  
WDW EM  
SSB 0  
LB 0.30 Hz  
GB 0  
PC 4.00

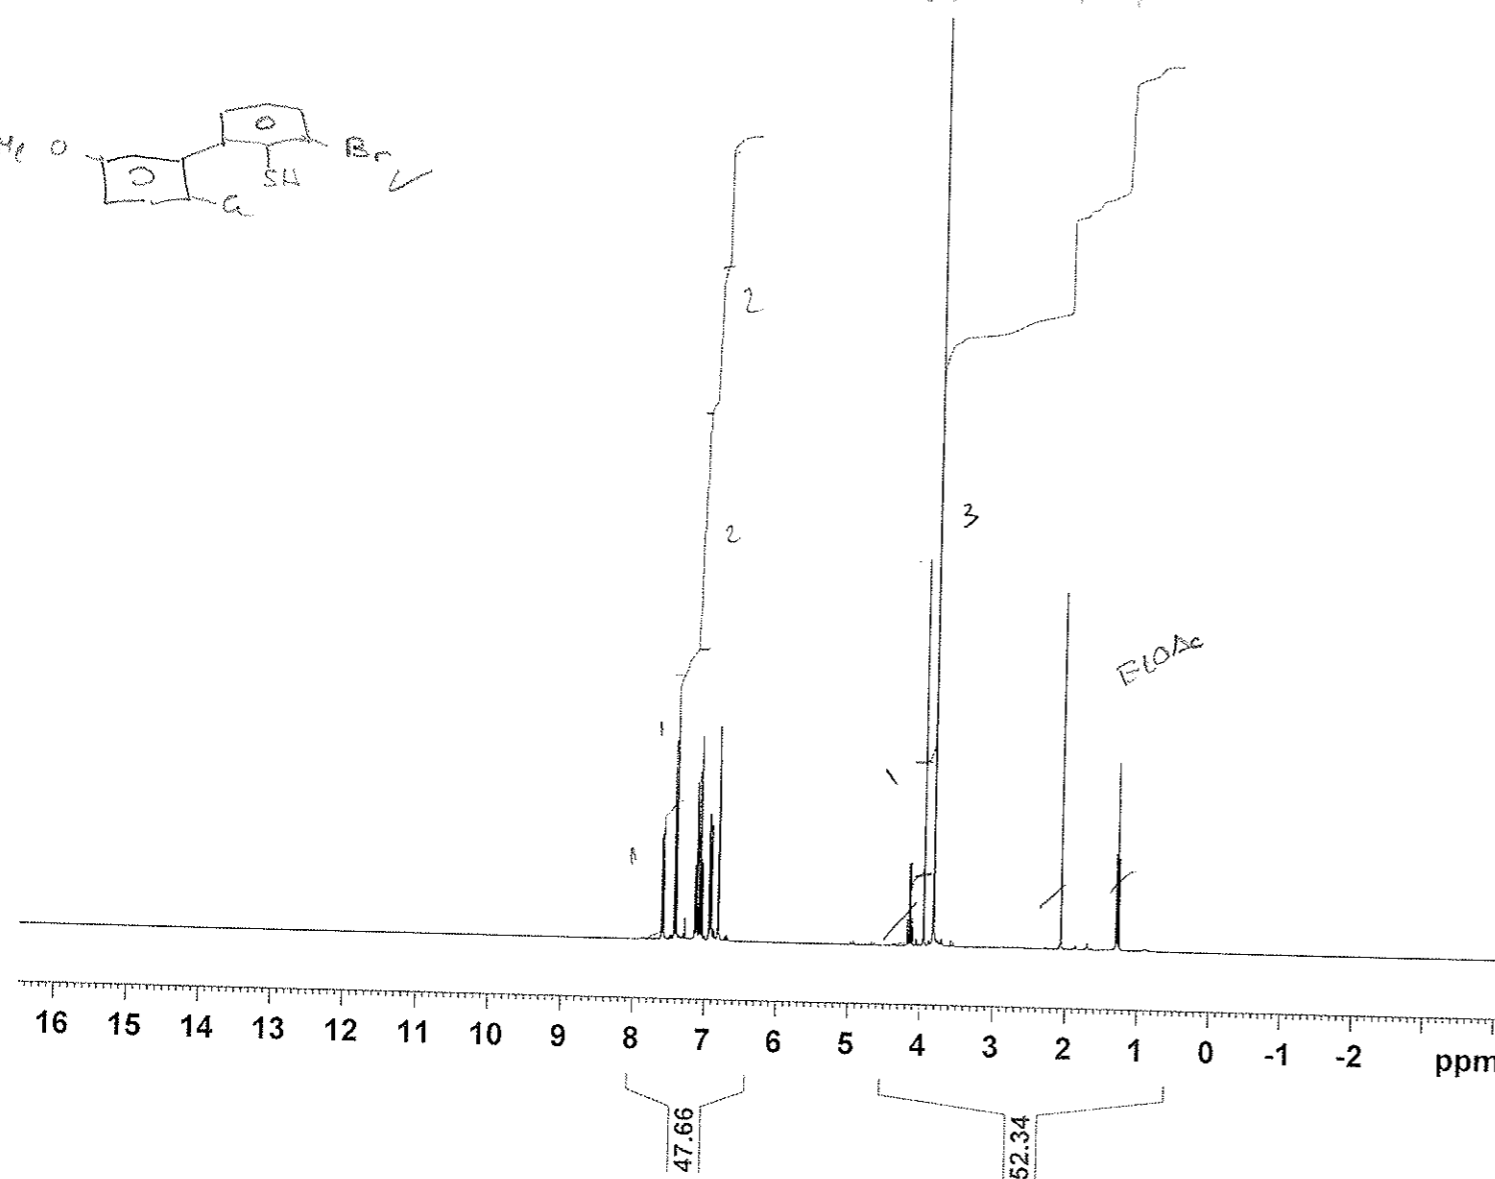

sr82e crude

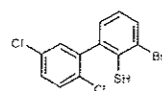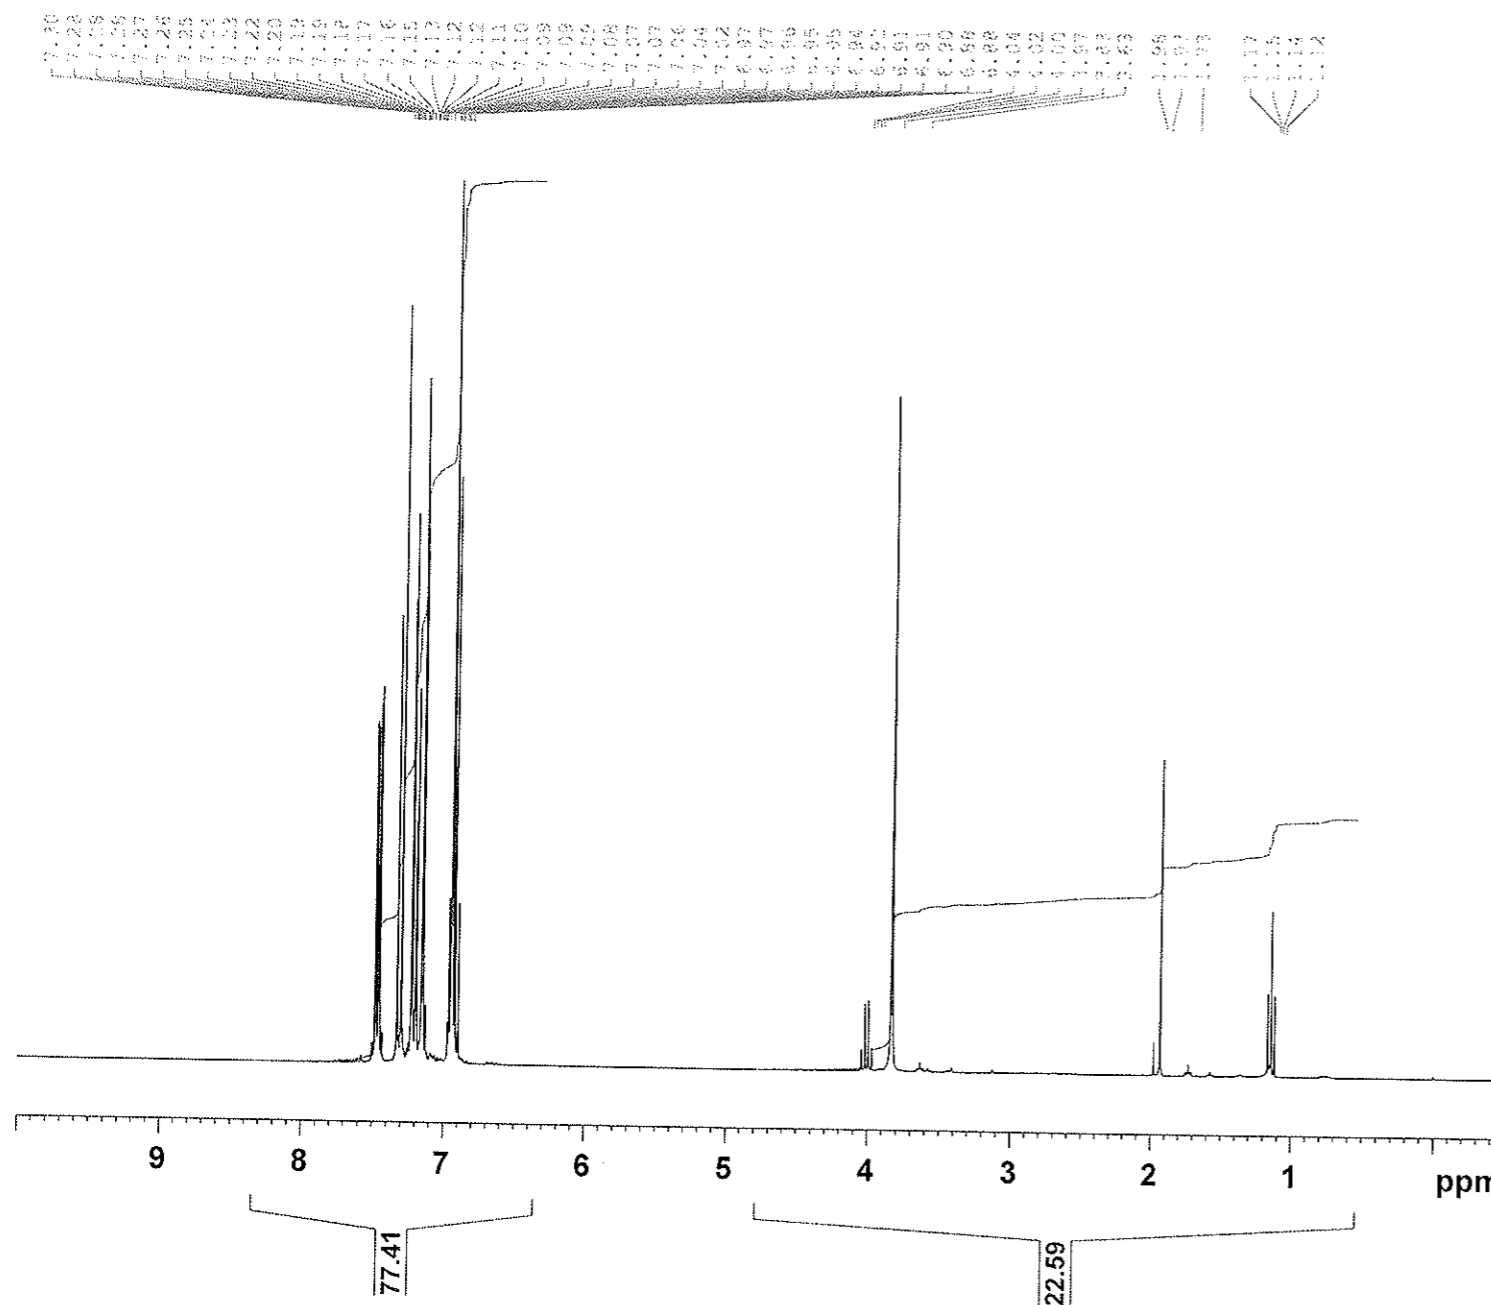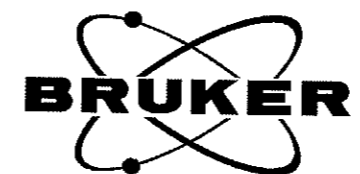

Current Data Parameters  
NAME sr82g  
EXPNO 1  
PROCNO 1

F2 - Acquisition Parameters  
Date\_ 20051003  
Time\_ 17.08  
INSTRUM spect  
PROBHD 5 mm Multinucl  
PULPROG zg30  
TD 32768  
SOLVENT CDCl3  
NS 32  
DS 2  
SWH 6188.119 Hz  
FIDRES 0.188846 Hz  
AQ 2.6477852 sec  
RG 64  
DW 80.800 usec  
DE 6.00 usec  
TE 292.8 K  
D1 1.00000000 sec  
MCREST 0.00000000 sec  
MCWRK 0.01500000 sec

===== CHANNEL f1 =====  
NUC1 1H  
P1 10.00 usec  
PL1 2.00 dB  
SFO1 300.1318534 MHz

F2 - Processing parameters  
SI 32768  
SF 300.1300456 MHz  
WDW EM  
SSB 0  
LB 0.30 Hz  
GB 0  
PC 4.00

5  
 sr104b

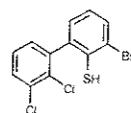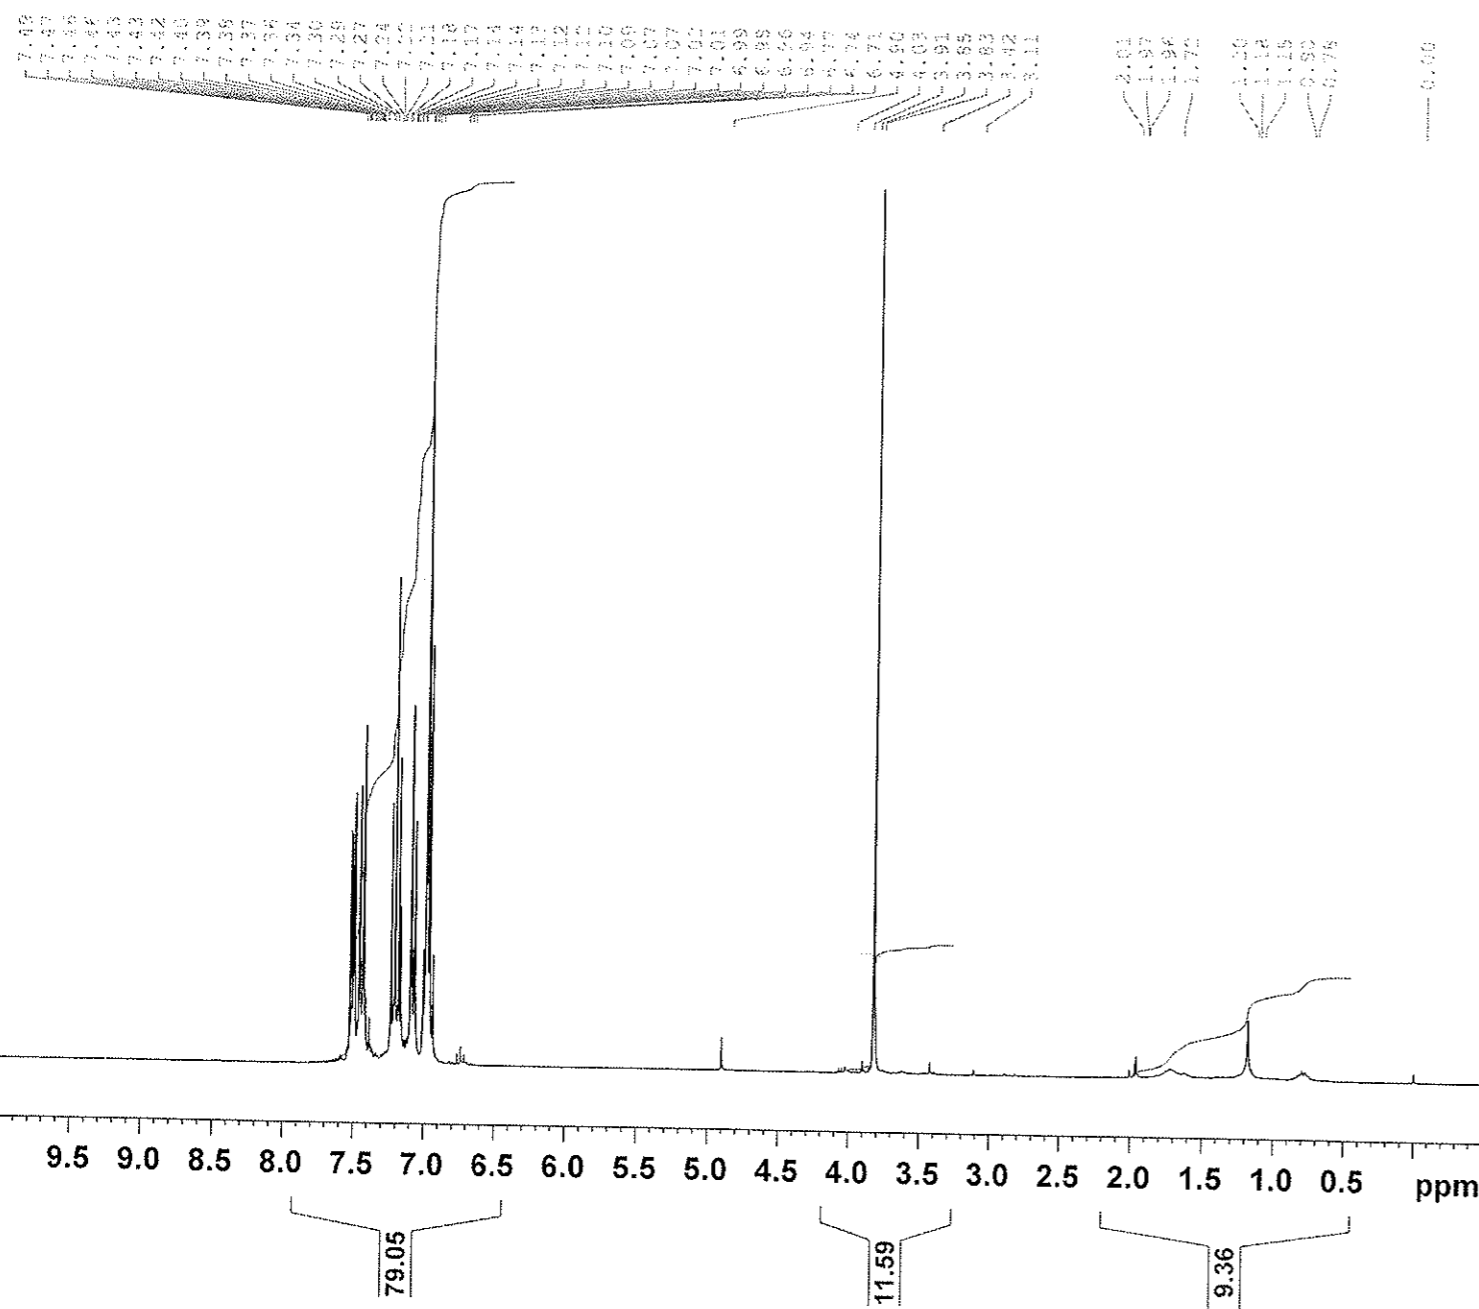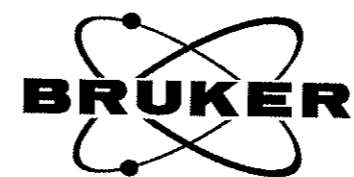

Current Data Parameters  
 NAME sr104b  
 EXPNO 2  
 PROCNO 1

F2 - Acquisition Parameters  
 Date\_ 20060206  
 Time\_ 9.25  
 INSTRUM spect  
 PROBHD 5 mm Multinucl  
 PULPROG zg30  
 TD 32768  
 SOLVENT CDCl3  
 NS 8  
 DS 0  
 SWH 6188.119 Hz  
 FIDRES 0.188846 Hz  
 AQ 2.6477852 sec  
 RG 256  
 DW 80.800 usec  
 DE 6.00 usec  
 TE 300.0 K  
 D1 1.00000000 sec  
 MCREST 0.00000000 sec  
 MCWRK 0.01500000 sec

===== CHANNEL f1 =====  
 NUC1 1H  
 P1 10.00 usec  
 PL1 2.00 dB  
 SFO1 300.1318534 MHz

F2 - Processing parameters  
 SI 32768  
 SF 300.1300335 MHz  
 WDW EM  
 SSB 0  
 LB 0.30 Hz  
 GB 0  
 PC 4.00

sr102a ac 4-7

4-Bromo-1-methoxydibenzo[*b,d*]thiophene (2a)

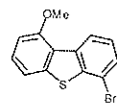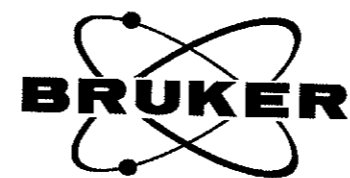

Current Data Parameters  
NAME sr102a  
EXPNO 3  
PROCNO 1

F2 - Acquisition Parameters  
Date\_ 20051201  
Time 9.28  
INSTRUM spect  
PROBHD 5 mm Multinucl  
PULPROG zg30  
TD 65536  
SOLVENT CDCl3  
NS 16  
DS 2  
SWH 6188.119 Hz  
FIDRES 0.094423 Hz  
AQ 5.2954397 sec  
RG 181  
DW 80.800 usec  
DE 6.00 usec  
TE 292.3 K  
D1 1.00000000 sec  
MCREST 0.00000000 sec  
MCWRK 0.01500000 sec

===== CHANNEL f1 =====  
NUC1 1H  
P1 10.00 usec  
PL1 2.00 dB  
SFO1 300.1318534 MHz

F2 - Processing parameters  
SI 32768  
SF 300.1300000 MHz  
WDW EM  
SSB 0  
LB 0.30 Hz  
GB 0  
PC 1.00

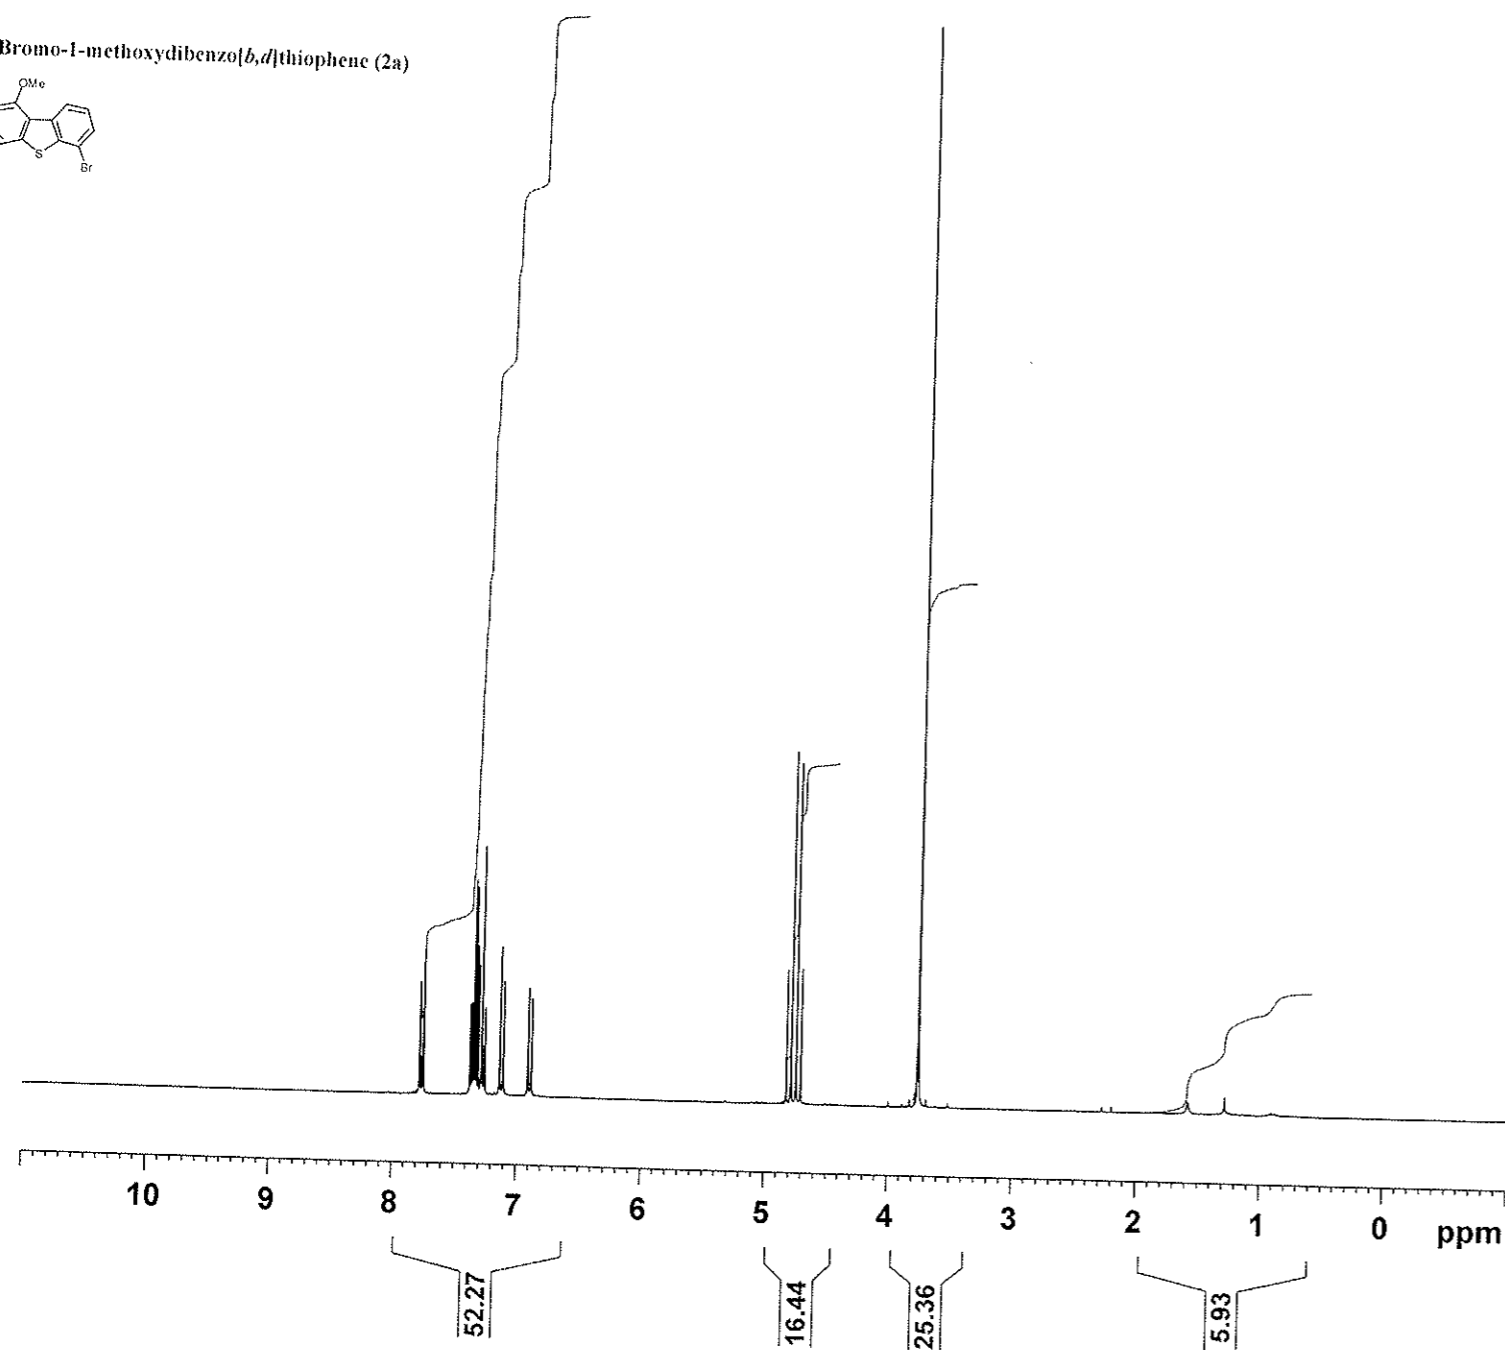

sr102a ac 4-7

2a

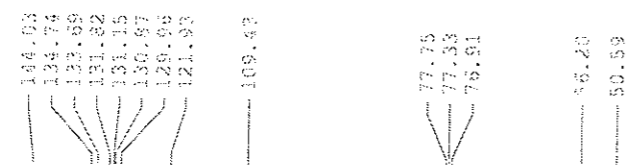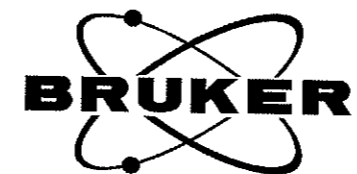

Current Data Parameters  
NAME sr102a  
EXPNO 5  
PROCNO 1

F2 - Acquisition Parameters  
Date\_ 20051201  
Time 9.39  
INSTRUM spect  
PROBHD 5 mm Multinucl  
PULPROG zgpg30  
TD 35968  
SOLVENT CDCl3  
NS 128  
DS 4  
SWH 17985.611 Hz  
FIDRES 0.500045 Hz  
AQ 0.9999882 sec  
RG 4096  
DW 27.800 usec  
DE 6.00 usec  
TE 304.2 K  
D1 1.00000000 sec  
d11 0.03000000 sec  
DELTA 0.89999998 sec  
MCREST 0.00000000 sec  
MCWRK 0.01500000 sec

===== CHANNEL f1 =====  
NUC1 13C  
P1 7.20 usec  
PL1 1.00 dB  
SFO1 75.4752653 MHz

===== CHANNEL f2 =====  
CPDPRG2 waltz16  
NUC2 1H  
PCPD2 10.00 usec  
PL2 2.00 dB  
PL12 2.00 dB  
PL13 120.00 dB  
SFO2 300.1312005 MHz

F2 - Processing parameters  
SI 32768  
SF 75.4677190 MHz  
WDW EM  
SSB 0  
LB 1.50 Hz  
GB 0  
PC 1.40

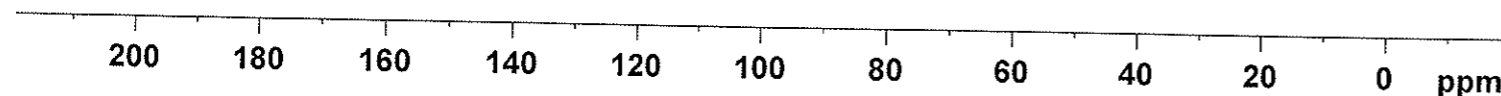

6-Bromo-3-methoxydibenzo[b,d]thiophene (2c)

srl42b

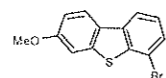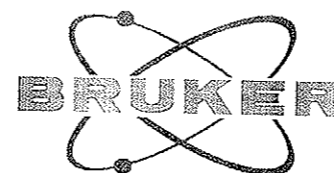

Current Data Parameters  
NAME srl42b  
EXPNO 1  
PROCNO 1

F2 - Acquisition Parameters  
Date\_ 20060608  
Time\_ 13.42  
INSTRUM spect  
PROBHD 5 mm Multinucl  
PULPROG zg30  
TD 32768  
SOLVENT CDC13  
NS 32  
DS 2  
SWH 6188.119 Hz  
FIDRES 0.188846 Hz  
AQ 2.6477852 sec  
RG 161.3  
DW 80.800 usec  
DE 6.00 usec  
TE 294.7 K  
D1 1.00000000 sec  
MCREST 0.00000000 sec  
MCWRK 0.01500000 sec

===== CHANNEL f1 =====  
NUC1 1H  
P1 10.00 usec  
PL1 2.00 dB  
SFO1 300.1318534 MHz

F2 - Processing parameters  
SI 32768  
SF 300.1300382 MHz  
WDW EM  
SSB 0  
LB 0.30 Hz  
GB 0  
PC 4.00

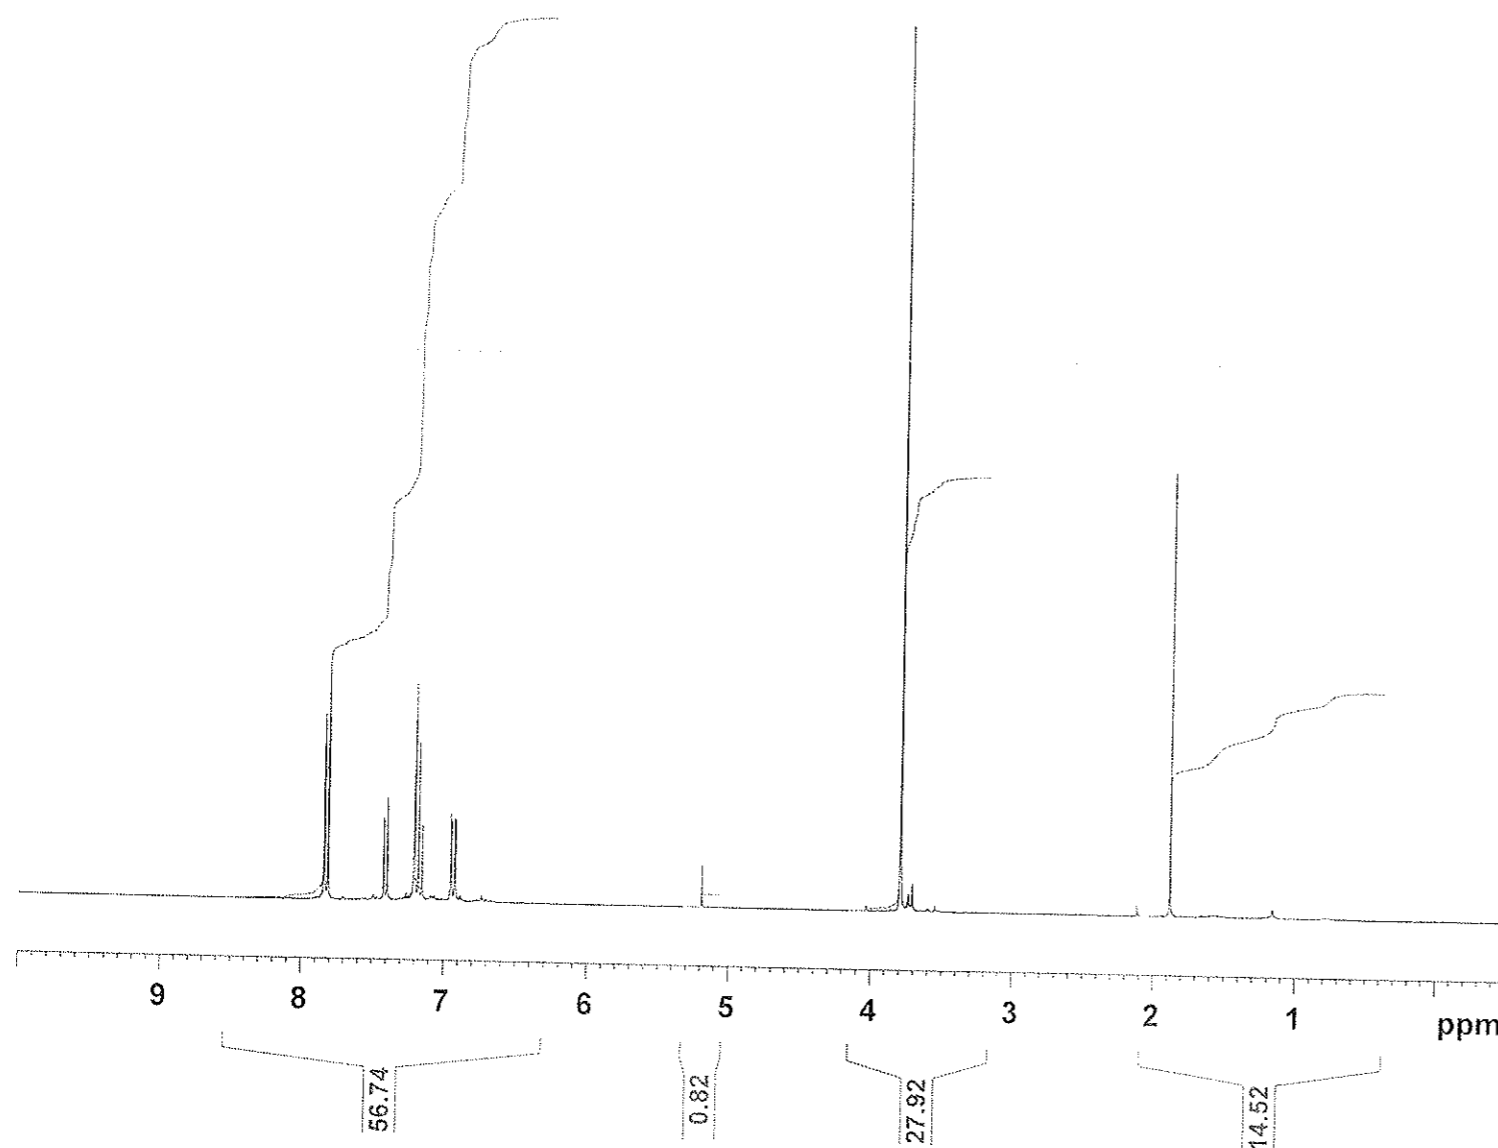

sr83h wp

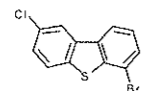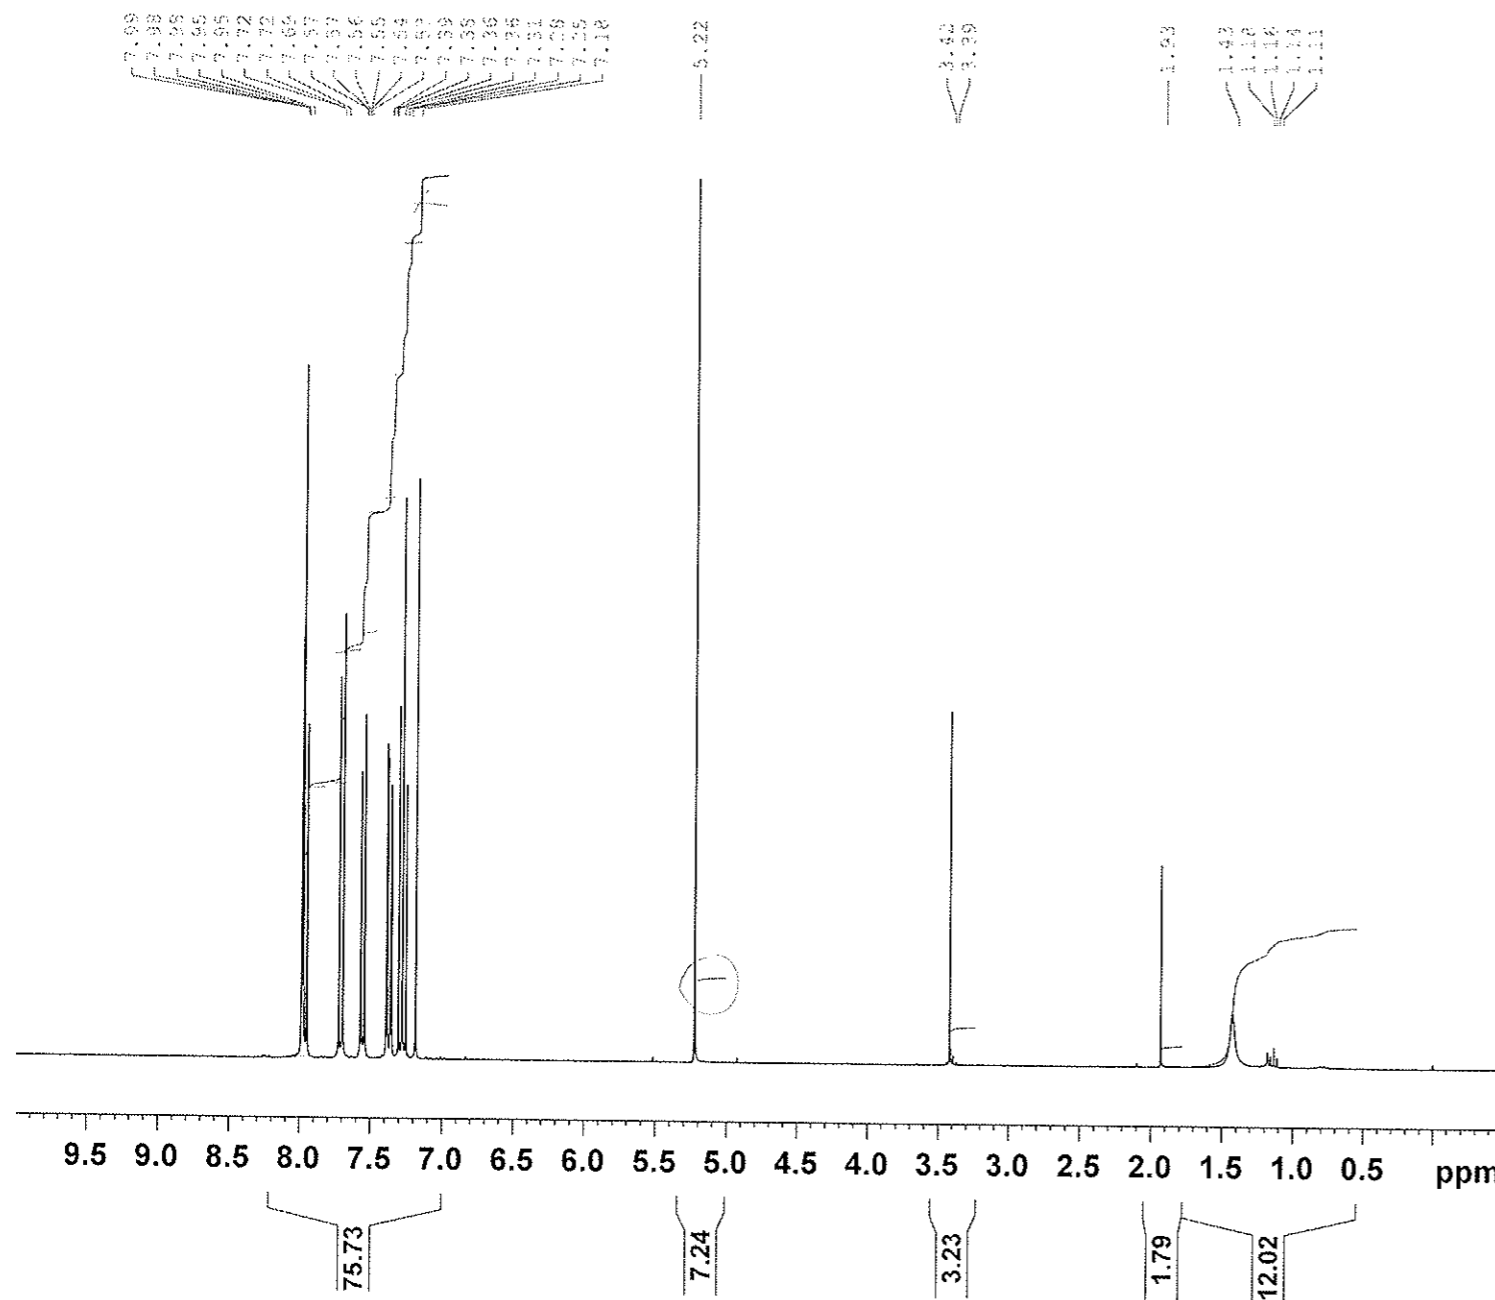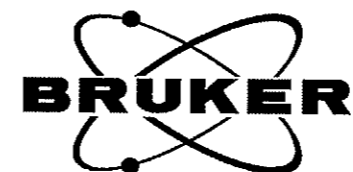

Current Data Parameters  
NAME sr83H  
EXPNO 1  
PROCNO 1

F2 - Acquisition Parameters  
Date\_ 20051012  
Time\_ 15.16  
INSTRUM spect  
PROBHD 5 mm Multinucl  
PULPROG zg30  
TD 32768  
SOLVENT CDC13  
NS 32  
DS 2  
SWH 6188.119 Hz  
FIDRES 0.188846 Hz  
AQ 2.6477852 sec  
RG 456.1  
DW 80.800 usec  
DE 6.00 usec  
TE 295.9 K  
D1 1.00000000 sec  
MCREST 0.00000000 sec  
MCWRK 0.01500000 sec

===== CHANNEL f1 =====  
NUC1 1H  
P1 10.00 usec  
PL1 2.00 dB  
SFO1 300.1318534 MHz

F2 - Processing parameters  
SI 32768  
SF 300.1300291 MHz  
WDW EM  
SSB 0  
LB 0.30 Hz  
GB 0  
PC 4.00

6-Bromo-3-chlorodibenzo[b,d]thiophene (2e)

sr96a

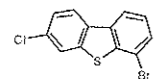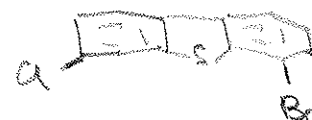

7.20  
7.19  
7.18  
7.17  
7.16  
7.15  
7.14  
7.13  
7.12  
7.11  
7.10  
7.09  
7.08  
7.07  
7.06  
7.05  
7.04  
7.03  
7.02  
7.01  
7.00  
6.99  
6.98  
6.97  
6.96  
6.95  
6.94  
6.93  
6.92  
6.91  
6.90  
6.89  
6.88  
6.87  
6.86  
6.85  
6.84  
6.83  
6.82  
6.81  
6.80  
6.79  
6.78  
6.77  
6.76  
6.75  
6.74  
6.73  
6.72  
6.71  
6.70  
6.69  
6.68  
6.67  
6.66  
6.65  
6.64  
6.63  
6.62  
6.61  
6.60  
6.59  
6.58  
6.57  
6.56  
6.55  
6.54  
6.53  
6.52  
6.51  
6.50  
6.49  
6.48  
6.47  
6.46  
6.45  
6.44  
6.43  
6.42  
6.41  
6.40  
6.39  
6.38  
6.37  
6.36  
6.35  
6.34  
6.33  
6.32  
6.31  
6.30  
6.29  
6.28  
6.27  
6.26  
6.25  
6.24  
6.23  
6.22  
6.21  
6.20  
6.19  
6.18  
6.17  
6.16  
6.15  
6.14  
6.13  
6.12  
6.11  
6.10  
6.09  
6.08  
6.07  
6.06  
6.05  
6.04  
6.03  
6.02  
6.01  
6.00  
5.99  
5.98  
5.97  
5.96  
5.95  
5.94  
5.93  
5.92  
5.91  
5.90  
5.89  
5.88  
5.87  
5.86  
5.85  
5.84  
5.83  
5.82  
5.81  
5.80  
5.79  
5.78  
5.77  
5.76  
5.75  
5.74  
5.73  
5.72  
5.71  
5.70  
5.69  
5.68  
5.67  
5.66  
5.65  
5.64  
5.63  
5.62  
5.61  
5.60  
5.59  
5.58  
5.57  
5.56  
5.55  
5.54  
5.53  
5.52  
5.51  
5.50  
5.49  
5.48  
5.47  
5.46  
5.45  
5.44  
5.43  
5.42  
5.41  
5.40  
5.39  
5.38  
5.37  
5.36  
5.35  
5.34  
5.33  
5.32  
5.31  
5.30  
5.29  
5.28  
5.27  
5.26  
5.25  
5.24  
5.23  
5.22  
5.21  
5.20  
5.19  
5.18  
5.17  
5.16  
5.15  
5.14  
5.13  
5.12  
5.11  
5.10  
5.09  
5.08  
5.07  
5.06  
5.05  
5.04  
5.03  
5.02  
5.01  
5.00  
4.99  
4.98  
4.97  
4.96  
4.95  
4.94  
4.93  
4.92  
4.91  
4.90  
4.89  
4.88  
4.87  
4.86  
4.85  
4.84  
4.83  
4.82  
4.81  
4.80  
4.79  
4.78  
4.77  
4.76  
4.75  
4.74  
4.73  
4.72  
4.71  
4.70  
4.69  
4.68  
4.67  
4.66  
4.65  
4.64  
4.63  
4.62  
4.61  
4.60  
4.59  
4.58  
4.57  
4.56  
4.55  
4.54  
4.53  
4.52  
4.51  
4.50  
4.49  
4.48  
4.47  
4.46  
4.45  
4.44  
4.43  
4.42  
4.41  
4.40  
4.39  
4.38  
4.37  
4.36  
4.35  
4.34  
4.33  
4.32  
4.31  
4.30  
4.29  
4.28  
4.27  
4.26  
4.25  
4.24  
4.23  
4.22  
4.21  
4.20  
4.19  
4.18  
4.17  
4.16  
4.15  
4.14  
4.13  
4.12  
4.11  
4.10  
4.09  
4.08  
4.07  
4.06  
4.05  
4.04  
4.03  
4.02  
4.01  
4.00  
3.99  
3.98  
3.97  
3.96  
3.95  
3.94  
3.93  
3.92  
3.91  
3.90  
3.89  
3.88  
3.87  
3.86  
3.85  
3.84  
3.83  
3.82  
3.81  
3.80  
3.79  
3.78  
3.77  
3.76  
3.75  
3.74  
3.73  
3.72  
3.71  
3.70  
3.69  
3.68  
3.67  
3.66  
3.65  
3.64  
3.63  
3.62  
3.61  
3.60  
3.59  
3.58  
3.57  
3.56  
3.55  
3.54  
3.53  
3.52  
3.51  
3.50  
3.49  
3.48  
3.47  
3.46  
3.45  
3.44  
3.43  
3.42  
3.41  
3.40  
3.39  
3.38  
3.37  
3.36  
3.35  
3.34  
3.33  
3.32  
3.31  
3.30  
3.29  
3.28  
3.27  
3.26  
3.25  
3.24  
3.23  
3.22  
3.21  
3.20  
3.19  
3.18  
3.17  
3.16  
3.15  
3.14  
3.13  
3.12  
3.11  
3.10  
3.09  
3.08  
3.07  
3.06  
3.05  
3.04  
3.03  
3.02  
3.01  
3.00  
2.99  
2.98  
2.97  
2.96  
2.95  
2.94  
2.93  
2.92  
2.91  
2.90  
2.89  
2.88  
2.87  
2.86  
2.85  
2.84  
2.83  
2.82  
2.81  
2.80  
2.79  
2.78  
2.77  
2.76  
2.75  
2.74  
2.73  
2.72  
2.71  
2.70  
2.69  
2.68  
2.67  
2.66  
2.65  
2.64  
2.63  
2.62  
2.61  
2.60  
2.59  
2.58  
2.57  
2.56  
2.55  
2.54  
2.53  
2.52  
2.51  
2.50  
2.49  
2.48  
2.47  
2.46  
2.45  
2.44  
2.43  
2.42  
2.41  
2.40  
2.39  
2.38  
2.37  
2.36  
2.35  
2.34  
2.33  
2.32  
2.31  
2.30  
2.29  
2.28  
2.27  
2.26  
2.25  
2.24  
2.23  
2.22  
2.21  
2.20  
2.19  
2.18  
2.17  
2.16  
2.15  
2.14  
2.13  
2.12  
2.11  
2.10  
2.09  
2.08  
2.07  
2.06  
2.05  
2.04  
2.03  
2.02  
2.01  
2.00  
1.99  
1.98  
1.97  
1.96  
1.95  
1.94  
1.93  
1.92  
1.91  
1.90  
1.89  
1.88  
1.87  
1.86  
1.85  
1.84  
1.83  
1.82  
1.81  
1.80  
1.79  
1.78  
1.77  
1.76  
1.75  
1.74  
1.73  
1.72  
1.71  
1.70  
1.69  
1.68  
1.67  
1.66  
1.65  
1.64  
1.63  
1.62  
1.61  
1.60  
1.59  
1.58  
1.57  
1.56  
1.55  
1.54  
1.53  
1.52  
1.51  
1.50  
1.49  
1.48  
1.47  
1.46  
1.45  
1.44  
1.43  
1.42  
1.41  
1.40  
1.39  
1.38  
1.37  
1.36  
1.35  
1.34  
1.33  
1.32  
1.31  
1.30  
1.29  
1.28  
1.27  
1.26  
1.25  
1.24  
1.23  
1.22  
1.21  
1.20  
1.19  
1.18  
1.17  
1.16  
1.15  
1.14  
1.13  
1.12  
1.11  
1.10  
1.09  
1.08  
1.07  
1.06  
1.05  
1.04  
1.03  
1.02  
1.01  
1.00  
0.99  
0.98  
0.97  
0.96  
0.95  
0.94  
0.93  
0.92  
0.91  
0.90  
0.89  
0.88  
0.87  
0.86  
0.85  
0.84  
0.83  
0.82  
0.81  
0.80  
0.79  
0.78  
0.77  
0.76  
0.75  
0.74  
0.73  
0.72  
0.71  
0.70  
0.69  
0.68  
0.67  
0.66  
0.65  
0.64  
0.63  
0.62  
0.61  
0.60  
0.59  
0.58  
0.57  
0.56  
0.55  
0.54  
0.53  
0.52  
0.51  
0.50  
0.49  
0.48  
0.47  
0.46  
0.45  
0.44  
0.43  
0.42  
0.41  
0.40  
0.39  
0.38  
0.37  
0.36  
0.35  
0.34  
0.33  
0.32  
0.31  
0.30  
0.29  
0.28  
0.27  
0.26  
0.25  
0.24  
0.23  
0.22  
0.21  
0.20  
0.19  
0.18  
0.17  
0.16  
0.15  
0.14  
0.13  
0.12  
0.11  
0.10  
0.09  
0.08  
0.07  
0.06  
0.05  
0.04  
0.03  
0.02  
0.01  
0.00  
-0.01  
-0.02  
-0.03  
-0.04  
-0.05  
-0.06  
-0.07  
-0.08  
-0.09  
-0.10  
-0.11  
-0.12  
-0.13  
-0.14  
-0.15  
-0.16  
-0.17  
-0.18  
-0.19  
-0.20  
-0.21  
-0.22  
-0.23  
-0.24  
-0.25  
-0.26  
-0.27  
-0.28  
-0.29  
-0.30  
-0.31  
-0.32  
-0.33  
-0.34  
-0.35  
-0.36  
-0.37  
-0.38  
-0.39  
-0.40  
-0.41  
-0.42  
-0.43  
-0.44  
-0.45  
-0.46  
-0.47  
-0.48  
-0.49  
-0.50  
-0.51  
-0.52  
-0.53  
-0.54  
-0.55  
-0.56  
-0.57  
-0.58  
-0.59  
-0.60  
-0.61  
-0.62  
-0.63  
-0.64  
-0.65  
-0.66  
-0.67  
-0.68  
-0.69  
-0.70  
-0.71  
-0.72  
-0.73  
-0.74  
-0.75  
-0.76  
-0.77  
-0.78  
-0.79  
-0.80  
-0.81  
-0.82  
-0.83  
-0.84  
-0.85  
-0.86  
-0.87  
-0.88  
-0.89  
-0.90  
-0.91  
-0.92  
-0.93  
-0.94  
-0.95  
-0.96  
-0.97  
-0.98  
-0.99  
-1.00  
-1.01  
-1.02  
-1.03  
-1.04  
-1.05  
-1.06  
-1.07  
-1.08  
-1.09  
-1.10  
-1.11  
-1.12  
-1.13  
-1.14  
-1.15  
-1.16  
-1.17  
-1.18  
-1.19  
-1.20  
-1.21  
-1.22  
-1.23  
-1.24  
-1.25  
-1.26  
-1.27  
-1.28  
-1.29  
-1.30  
-1.31  
-1.32  
-1.33  
-1.34  
-1.35  
-1.36  
-1.37  
-1.38  
-1.39  
-1.40  
-1.41  
-1.42  
-1.43  
-1.44  
-1.45  
-1.46  
-1.47  
-1.48  
-1.49  
-1.50  
-1.51  
-1.52  
-1.53  
-1.54  
-1.55  
-1.56  
-1.57  
-1.58  
-1.59  
-1.60  
-1.61  
-1.62  
-1.63  
-1.64  
-1.65  
-1.66  
-1.67  
-1.68  
-1.69  
-1.70  
-1.71  
-1.72  
-1.73  
-1.74  
-1.75  
-1.76  
-1.77  
-1.78  
-1.79  
-1.80  
-1.81  
-1.82  
-1.83  
-1.84  
-1.85  
-1.86  
-1.87  
-1.88  
-1.89  
-1.90  
-1.91  
-1.92  
-1.93  
-1.94  
-1.95  
-1.96  
-1.97  
-1.98  
-1.99  
-2.00

1.50  
1.16  
0.00

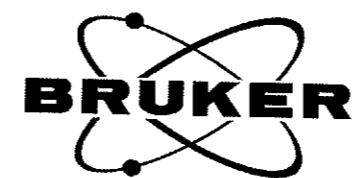

Current Data Parameters  
 NAME sr96a  
 EXPNO 1  
 PROCNO 1

F2 - Acquisition Parameters  
 Date\_ 20051115  
 Time 11.53  
 INSTRUM spect  
 PROBHD 5 mm Multinucl  
 PULPROG zg30  
 TD 32768  
 SOLVENT CDC13  
 NS 32  
 DS 2  
 SWH 6188.119 Hz  
 FIDRES 0.188846 Hz  
 AQ 2.6477852 sec  
 RG 256  
 DW 80.800 usec  
 DE 6.00 usec  
 TE 292.8 K  
 D1 1.00000000 sec  
 MCREST 0.00000000 sec  
 MCWRK 0.01500000 sec

===== CHANNEL f1 =====  
 NUC1 1H  
 P1 10.00 usec  
 PL1 2.00 dB  
 SFO1 300.1318534 MHz

F2 - Processing parameters  
 SI 32768  
 SF 300.1300276 MHz  
 WDW EM  
 SSB 0  
 LB 0.30 Hz  
 GB 0  
 PC 4.00

16 15 14 13 12 11 10 9 8 7 6 5 4 3 2 1 0 -1 -2 ppm

33.76  
44.71

19.28  
1.05  
1.19

sr106a ac + rcrcy

4-Bromo-6-chlorodibenzo[b,d]thiophene (2f)

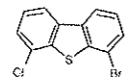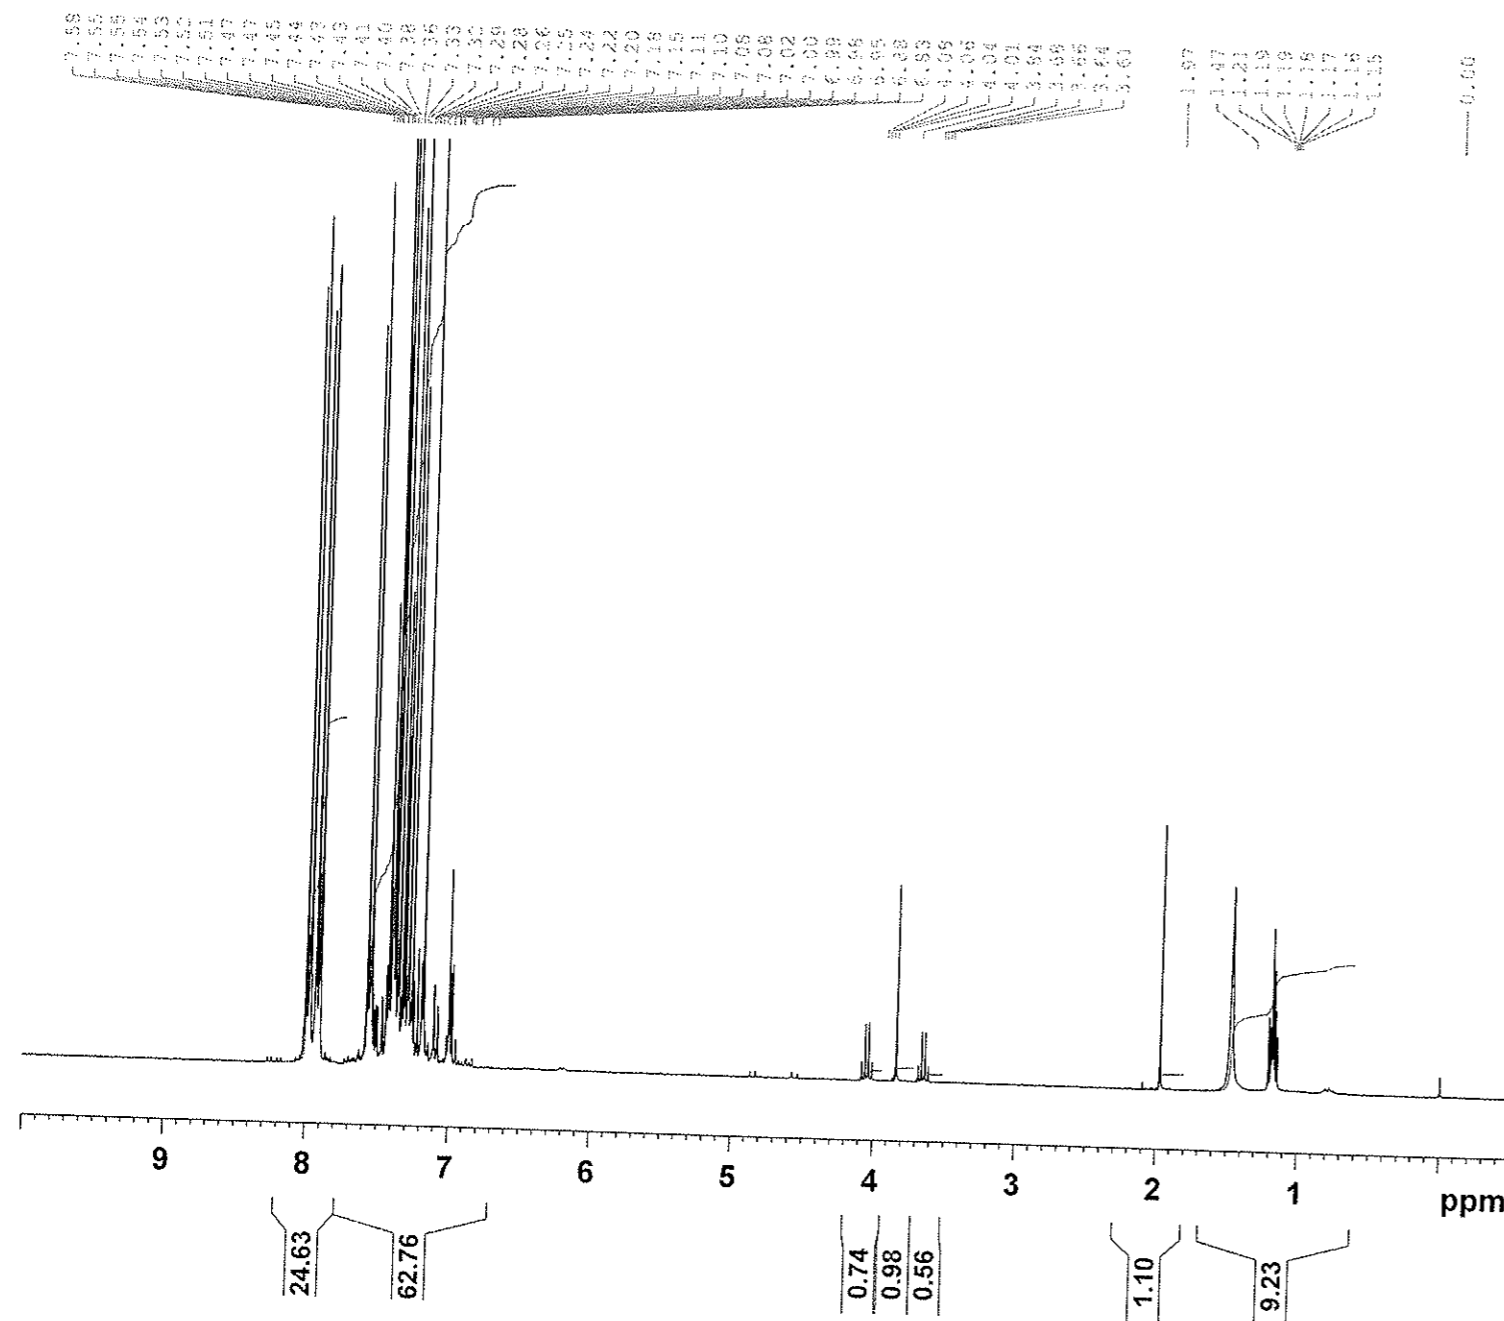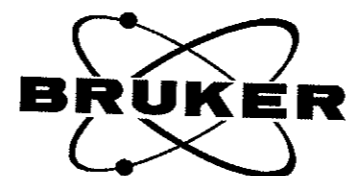

Current Data Parameters  
NAME sr106a  
EXPNO 6  
PROCNO 1

F2 - Acquisition Parameters  
Date\_ 20051219  
Time\_ 9.44  
INSTRUM spect  
PROBHD 5 mm Multinucl  
PULPROG zg30  
TD 32768  
SOLVENT CDCl3  
NS 32  
DS 2  
SWH 6188.119 Hz  
FIDRES 0.188846 Hz  
AQ 2.6477852 sec  
RG 406.4  
DW 80.800 usec  
DE 6.00 usec  
TE 292.3 K  
D1 1.00000000 sec  
MCREST 0.00000000 sec  
MCWRK 0.01500000 sec

===== CHANNEL f1 =====  
NUC1 1H  
P1 10.00 usec  
PL1 2.00 dB  
SFO1 300.1318534 MHz

F2 - Processing parameters  
SI 32768  
SF 300.1300293 MHz  
WDW EM  
SSB 0  
LB 0.30 Hz  
GB 0  
PC 4.00

sr109d ac

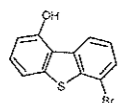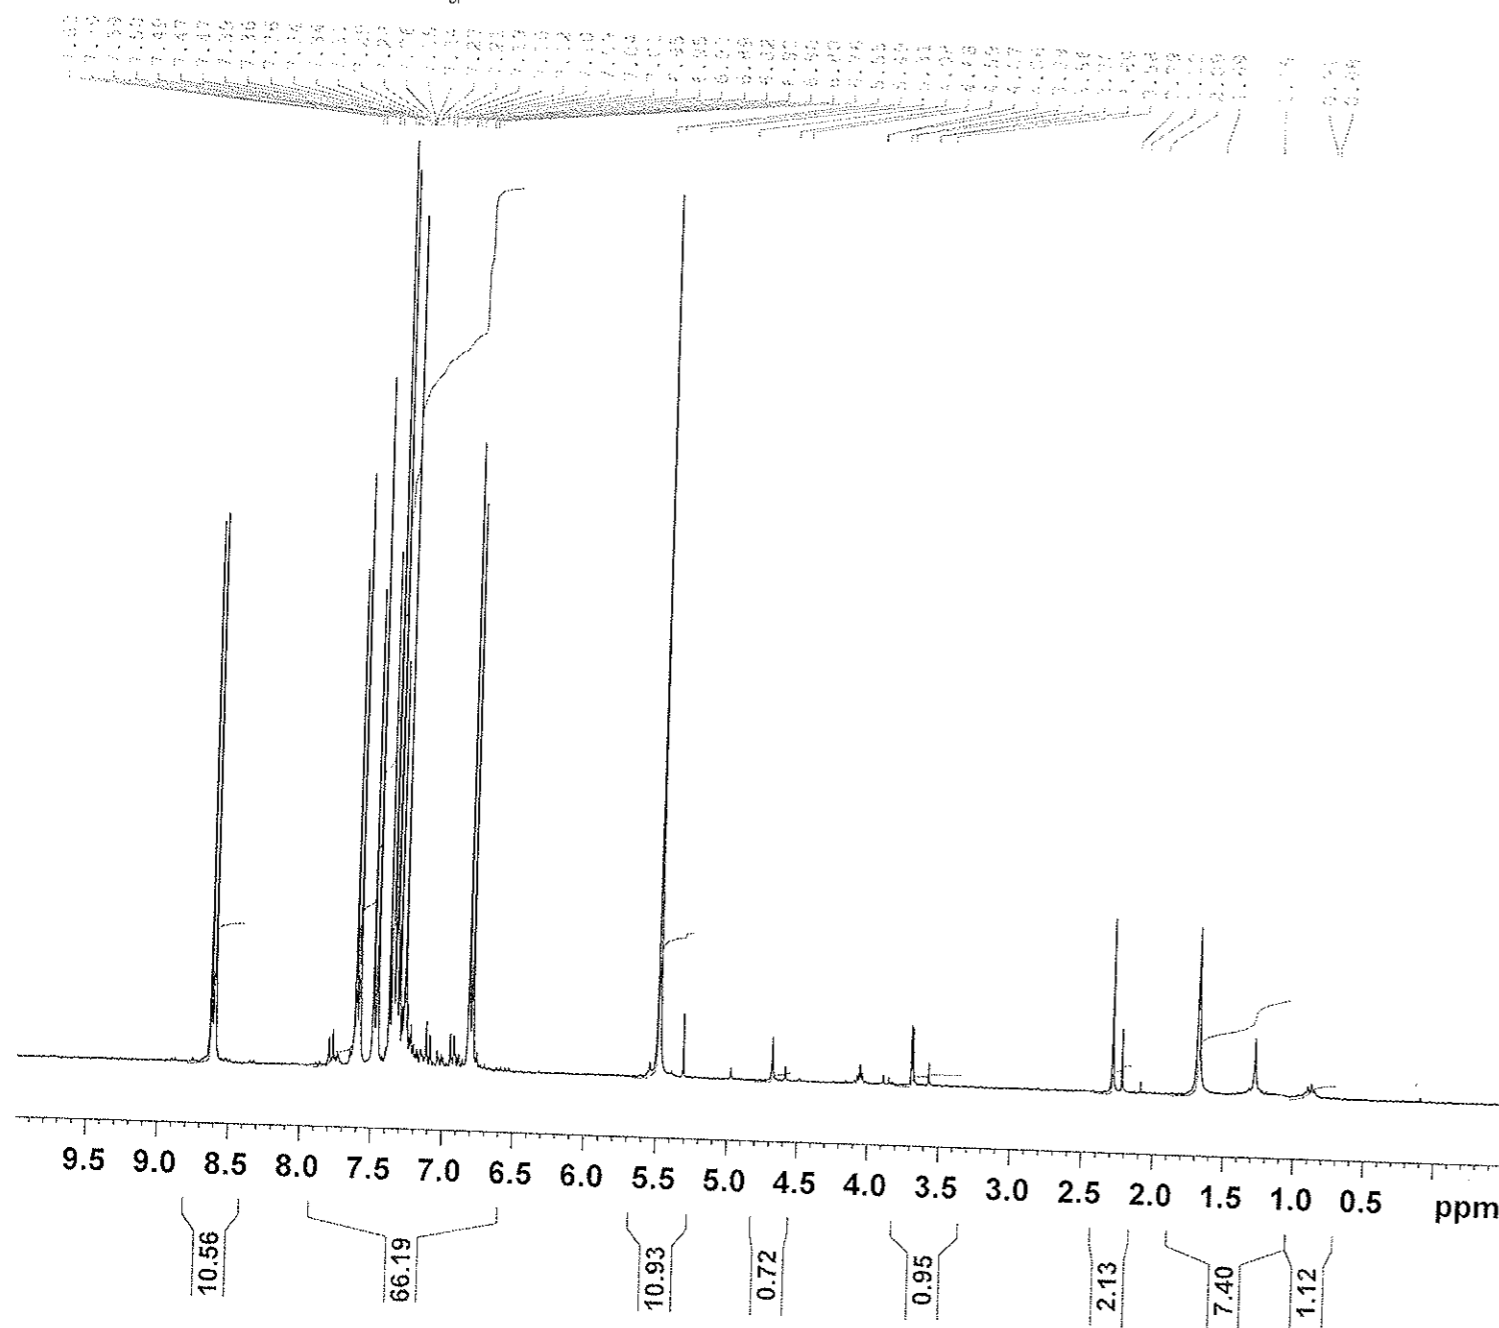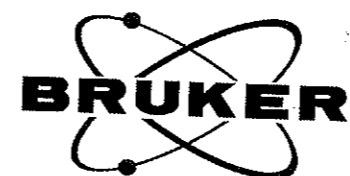

047-09-10

Current Data Parameters  
NAME sr109d  
EXPNO 1  
PROCNO 1

F2 - Acquisition Parameters  
Date\_ 20060302  
Time\_ 16.42  
INSTRUM spect  
PROBHD 5 mm Multinucl  
PULPROG zg30  
TD 32768  
SOLVENT CDCl3  
NS 8  
DS 0  
SWH 6188.119 Hz  
FIDRES 0.188846 Hz  
AQ 2.6477852 sec  
RG 574.7  
DW 80.800 usec  
DE 6.00 usec  
TE 300.1 K  
D1 1.00000000 sec  
MCREST 0.00000000 sec  
MCWRK 0.01500000 sec

===== CHANNEL f1 =====  
NUC1 1H  
P1 10.00 usec  
PL1 2.00 dB  
SFO1 300.1318534 MHz

F2 - Processing parameters  
SI 32768  
SF 300.1300000 MHz  
WDW EM  
SSB 0  
LB 0.30 Hz  
GB 0  
PC 4.00

sr144b ac

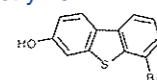

6-Bromodibenzo[b,d]thiophen-3-ol (3c)

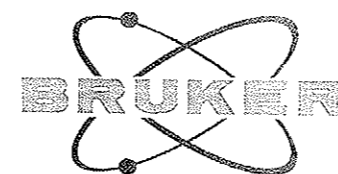

Current Data Parameters  
NAME sr144b  
EXPNO 1  
PROCNO 1

F2 - Acquisition Parameters  
Date 20060612  
Time 17.20  
INSTRUM spect  
PROBHD 5 mm Multinucl  
PULPROG zg30  
TD 32768  
SOLVENT CDCl3  
NS 32  
DS 2  
SWH 6186.119 Hz  
FIDRES 0.186846 Hz  
AQ 2.6477852 sec  
RG 456.1  
DW 80.800 usec  
DE 6.00 usec  
TE 295.3 K  
D1 1.00000000 sec  
MCREST 0.00000000 sec  
MCWRK 0.01500000 sec

===== CHANNEL f1 =====  
NUC1 1H  
P1 10.00 usec  
PL1 2.00 dB  
SFO1 300.1318534 MHz

F2 - Processing parameters  
SI 32768  
SF 300.1300000 MHz  
WDW EM  
SSB 0  
LB 0.30 Hz  
GB 0  
PC 4.00

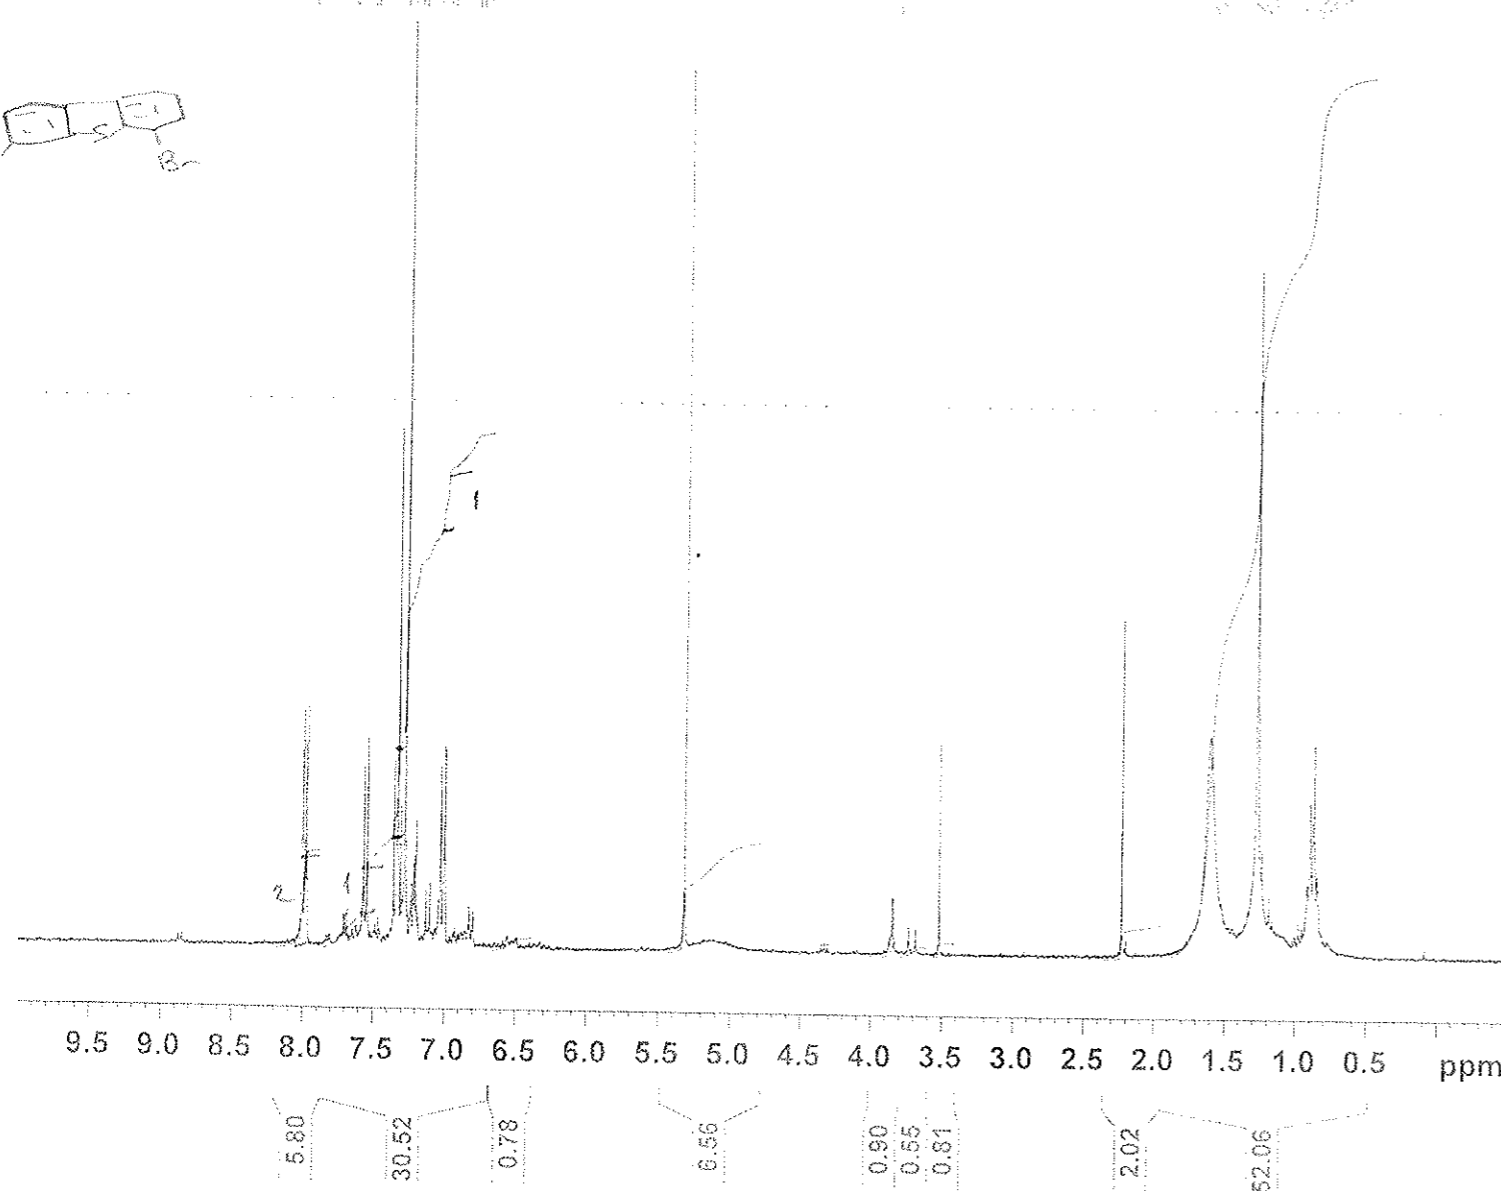

srl38?b ac

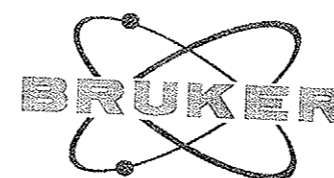

6-Bromo-dibenzo[b,d]thiophen-2-ol (3b)

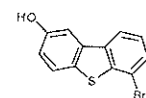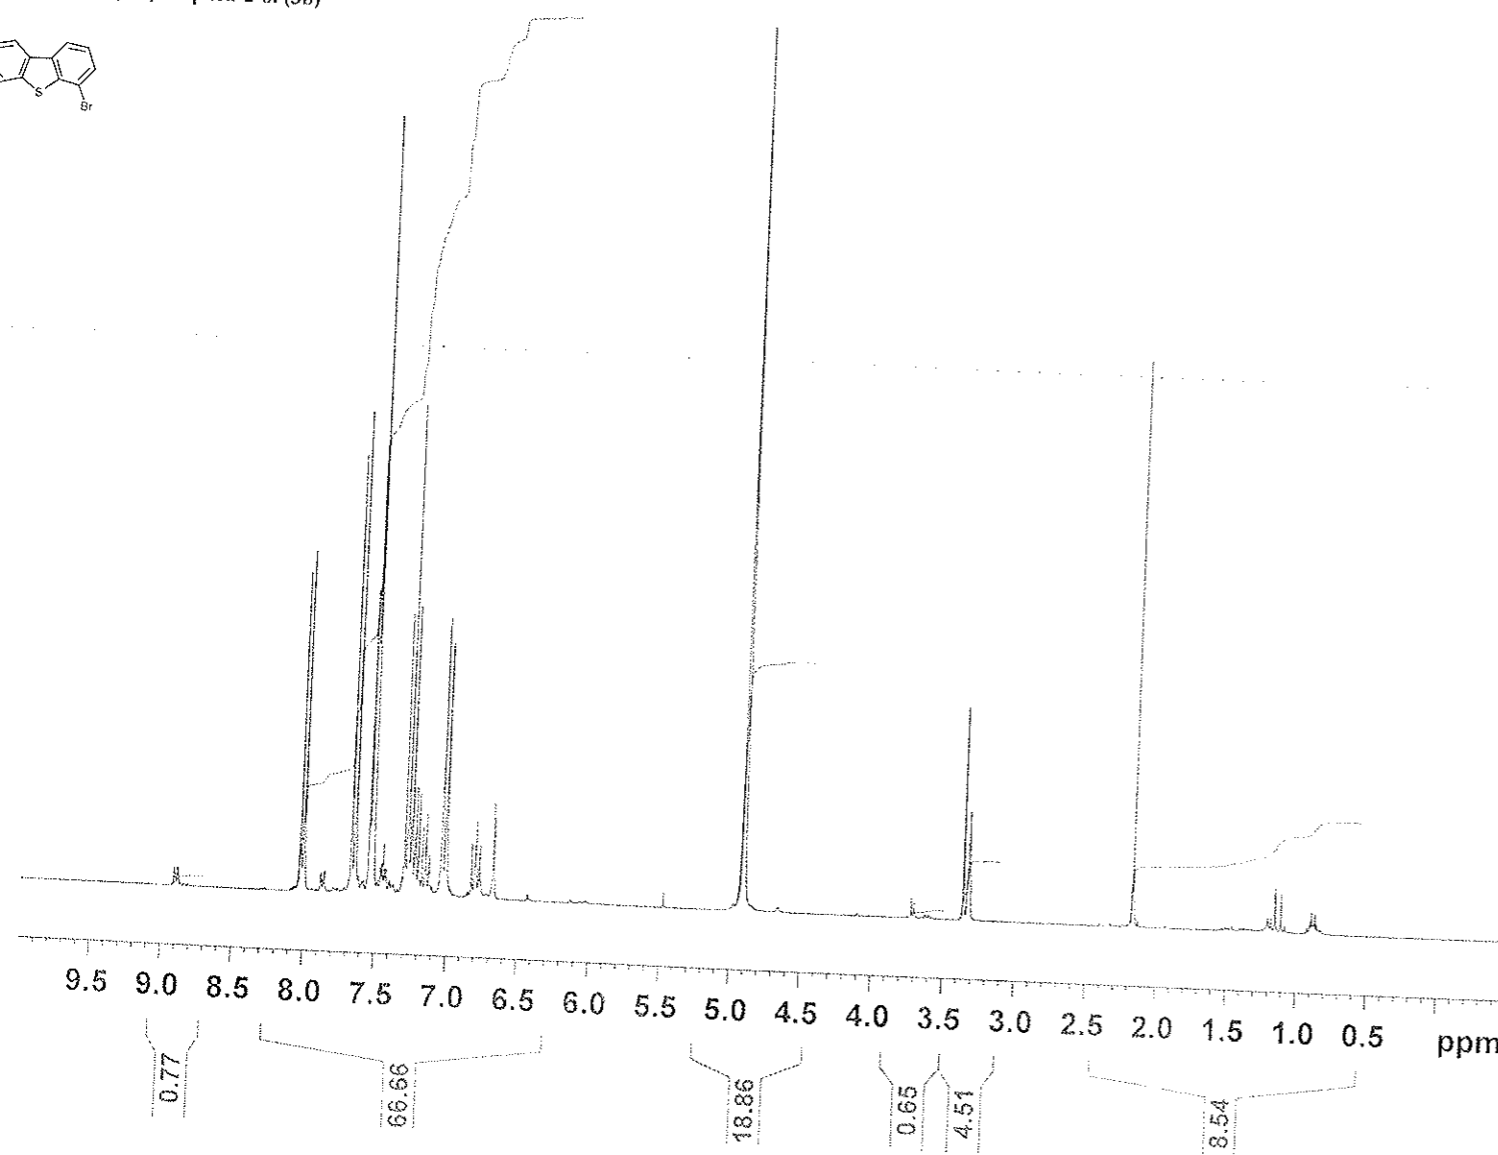

Current Data Parameters  
NAME srl38b  
EXPNO 1  
PROCNO 1

F2 - Acquisition Parameters  
Date\_ 20060609  
Time 17.13  
INSTRUM spect  
PROBHD 5 mm Multinucl  
PULPROG zg30  
TD 32768  
SOLVENT MeOD  
NS 32  
DS 2  
SWH 6188.119 Hz  
FIDRES 0.168846 Hz  
AQ 2.6477852 sec  
RG 228.1  
DW 80.800 usec  
DE 6.00 usec  
TE 295.1 K  
D1 1.00000000 sec  
MCREST 0.00000000 sec  
MCWRRK 0.01500000 sec

===== CHANNEL f1 =====  
NUC1 1H  
P1 10.00 usec  
PL1 2.00 dB  
SFO1 300.1318534 MHz

F2 - Processing parameters  
SI 32768  
SF 300.1300000 MHz  
WDW EM  
SSB 0  
LB 0.30 Hz  
GB 0  
PC 4.00

sr138? ac

3b.

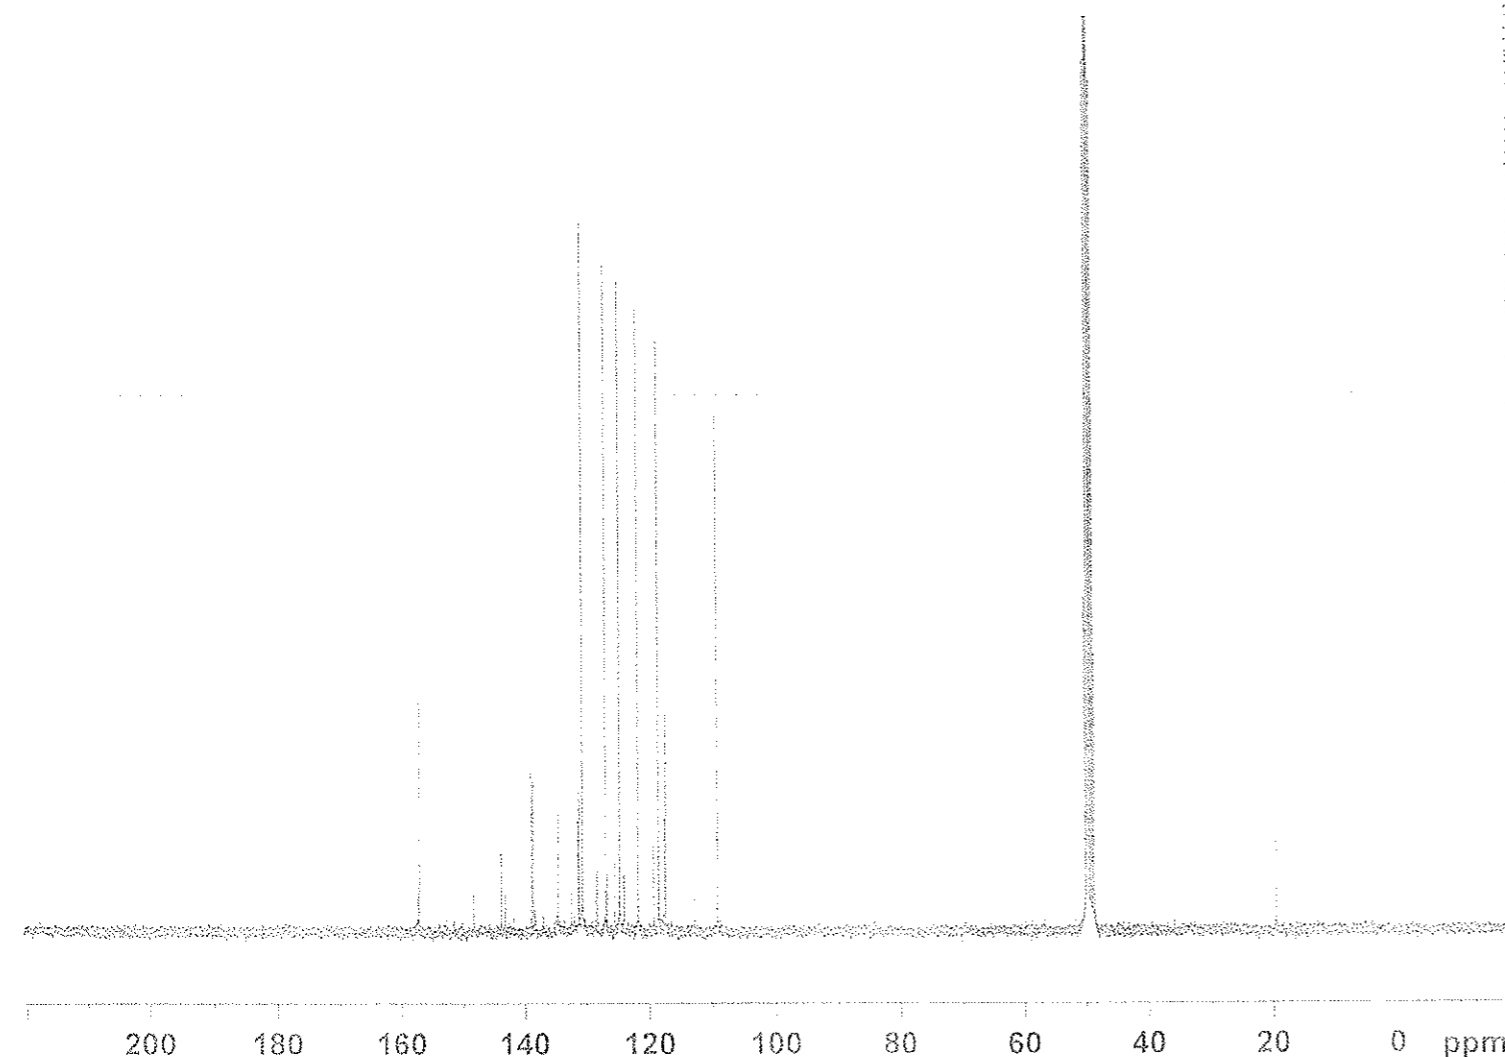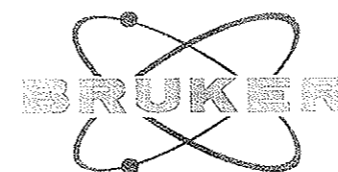

Current Data Parameters  
NAME sr138p  
EXPNO 2  
PROCNO 1

F2 - Acquisition Parameters  
Date\_ 20060612  
Time 0.49  
INSTRUM spect  
PROBHD 5 mm Multinuc1  
PULPROG zgpg30  
TD 35868  
SOLVENT MeOD  
NS 3600  
DS 4  
SWH 17983.611 Hz  
FIDRES 0.500045 Hz  
AQ 0.9999887 sec  
RG 3281  
DM 27.800 usec  
DE 8.00 usec  
TE 311.3 K  
D1 1.00000000 sec  
d11 0.03000000 sec  
DELTA 0.89999998 sec  
DCREST 0.00000000 sec  
MCWRF 0.01500000 sec

===== CHANNEL f1 =====  
NUC1 13C  
PL 7.20 usec  
PL1 1.00 dB  
SFO1 75.4752613 MHz

===== CHANNEL f2 =====  
CPDPRG2 waltz16  
NUC2 1H  
PCPD0 10.00 usec  
PL2 2.00 dB  
PL12 2.00 dB  
PL13 100.00 dB  
SFO2 300.1312003 MHz

F2 - Processing parameters  
SI 32768  
SF 75.4676118 MHz  
WDW EM  
SFB 0  
LB 1.30 Hz  
GB 0  
PC 1.10

sr112e 2 ac

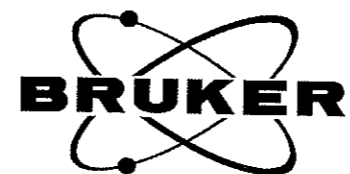

Current Data Parameters  
NAME sr112e  
EXPNO 1  
PROCNO 1

F2 - Acquisition Parameters  
Date\_ 20060405  
Time\_ 16.14  
INSTRUM spect  
PROBHD 5 mm Multinucl  
PULPROG zg30  
TD 32768  
SOLVENT C6D6  
NS 8  
DS 0  
SWH 6188.119 Hz  
FIDRES 0.188846 Hz  
AQ 2.6477852 sec  
RG 228.1  
DW 80.800 usec  
DE 6.00 usec  
TE 291.7 K  
D1 1.00000000 sec  
MCREST 0.00000000 sec  
MCWRK 0.01500000 sec

===== CHANNEL f1 =====  
NUC1 1H  
P1 10.00 usec  
PL1 2.00 dB  
SFO1 300.1318534 MHz

F2 - Processing parameters  
SI 32768  
SF 300.1300000 MHz  
WDW EM  
SSB 0  
LB 0.30 Hz  
GB 0  
PC 4.00

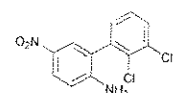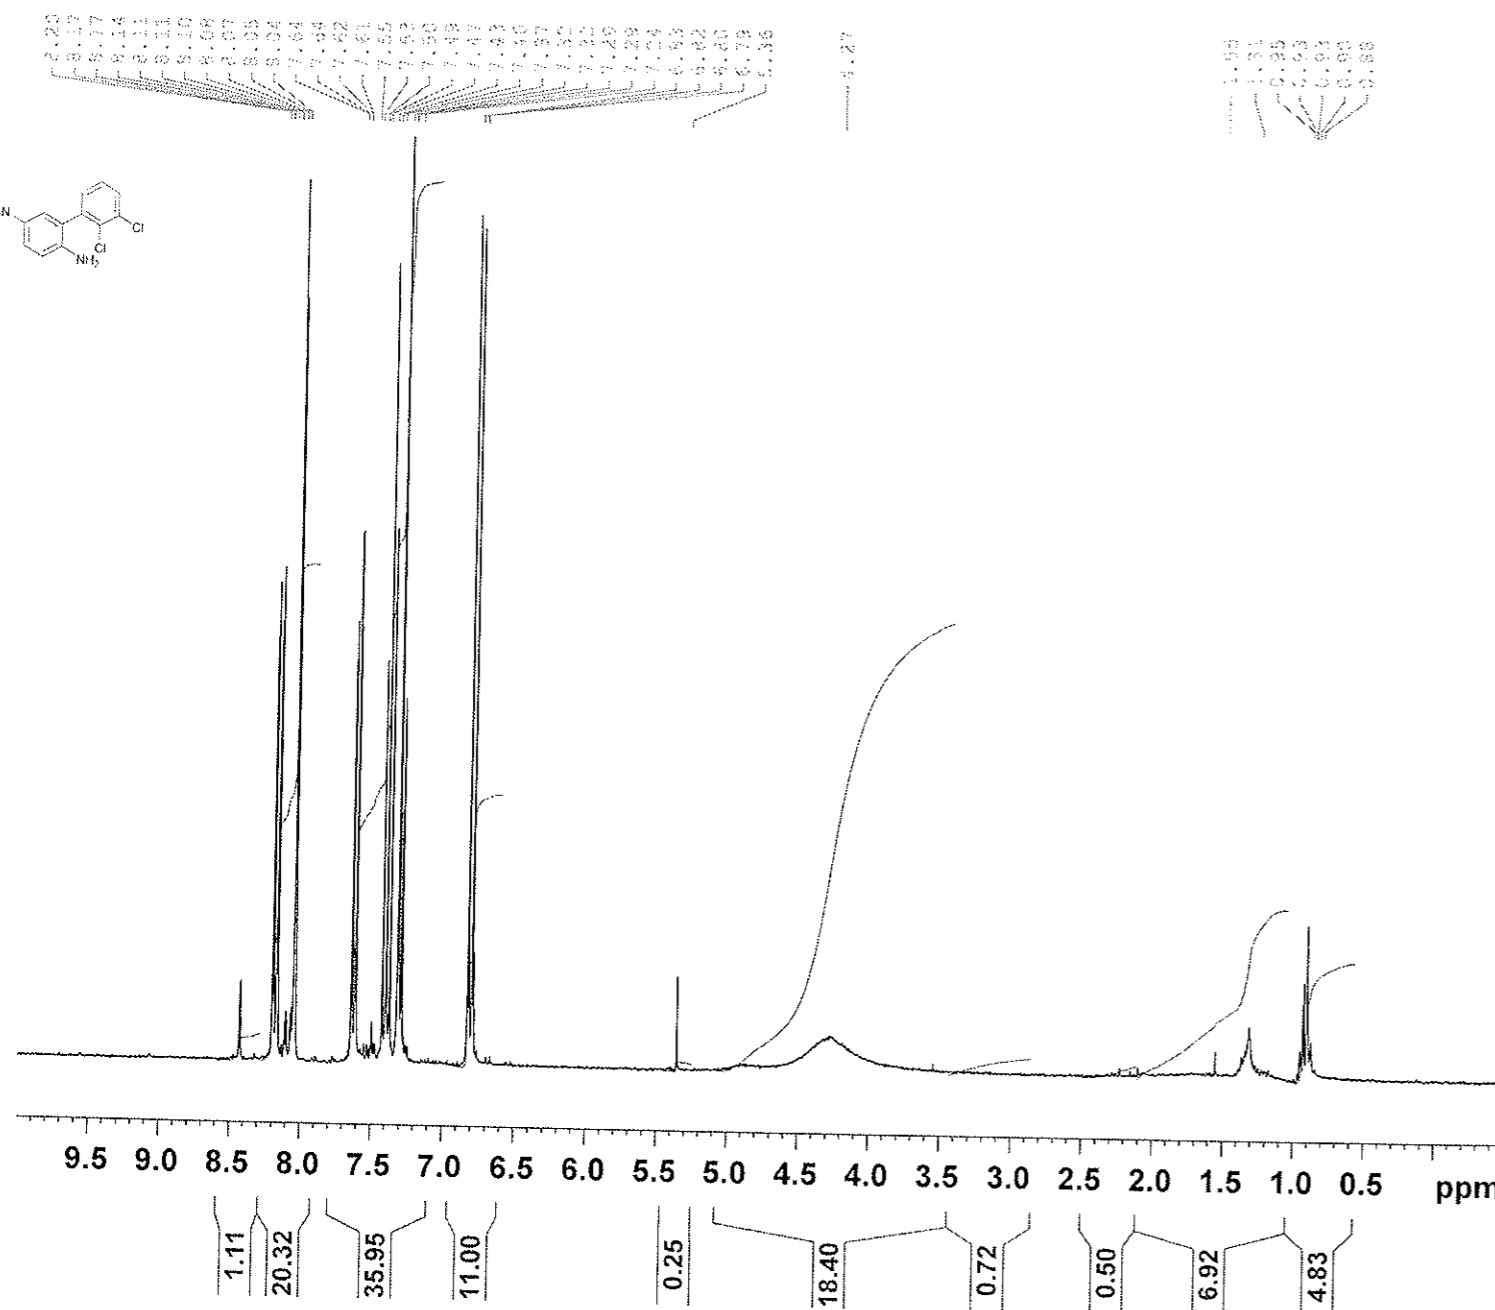

sr113d 2f ac

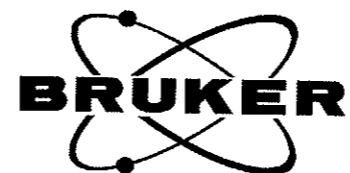

Current Data Parameters  
NAME sr113d  
EXPNO 2  
PROCNO 1

F2 - Acquisition Parameters  
Date\_ 20060203  
Time 9.26  
INSTRUM spect  
PROBHD 5 mm Multinucl  
PULPROG zg30  
TD 32768  
SOLVENT CDCl3  
NS 32  
DS 2  
SWH 6188.119 Hz  
FIDRES 0.188846 Hz  
AQ 2.6477852 sec  
RG 362  
DW 80.800 usec  
DE 6.00 usec  
TE 300.0 K  
D1 1.00000000 sec  
MCREST 0.00000000 sec  
MCWRK 0.01500000 sec

===== CHANNEL f1 =====  
NUC1 1H  
P1 10.00 usec  
PL1 2.00 dB  
SFO1 300.1318534 MHz

F2 - Processing parameters  
SI 32768  
SF 300.1300280 MHz  
WDW EM  
SSB 0  
LB 0.30 Hz  
GB 0  
PC 4.00

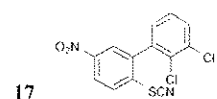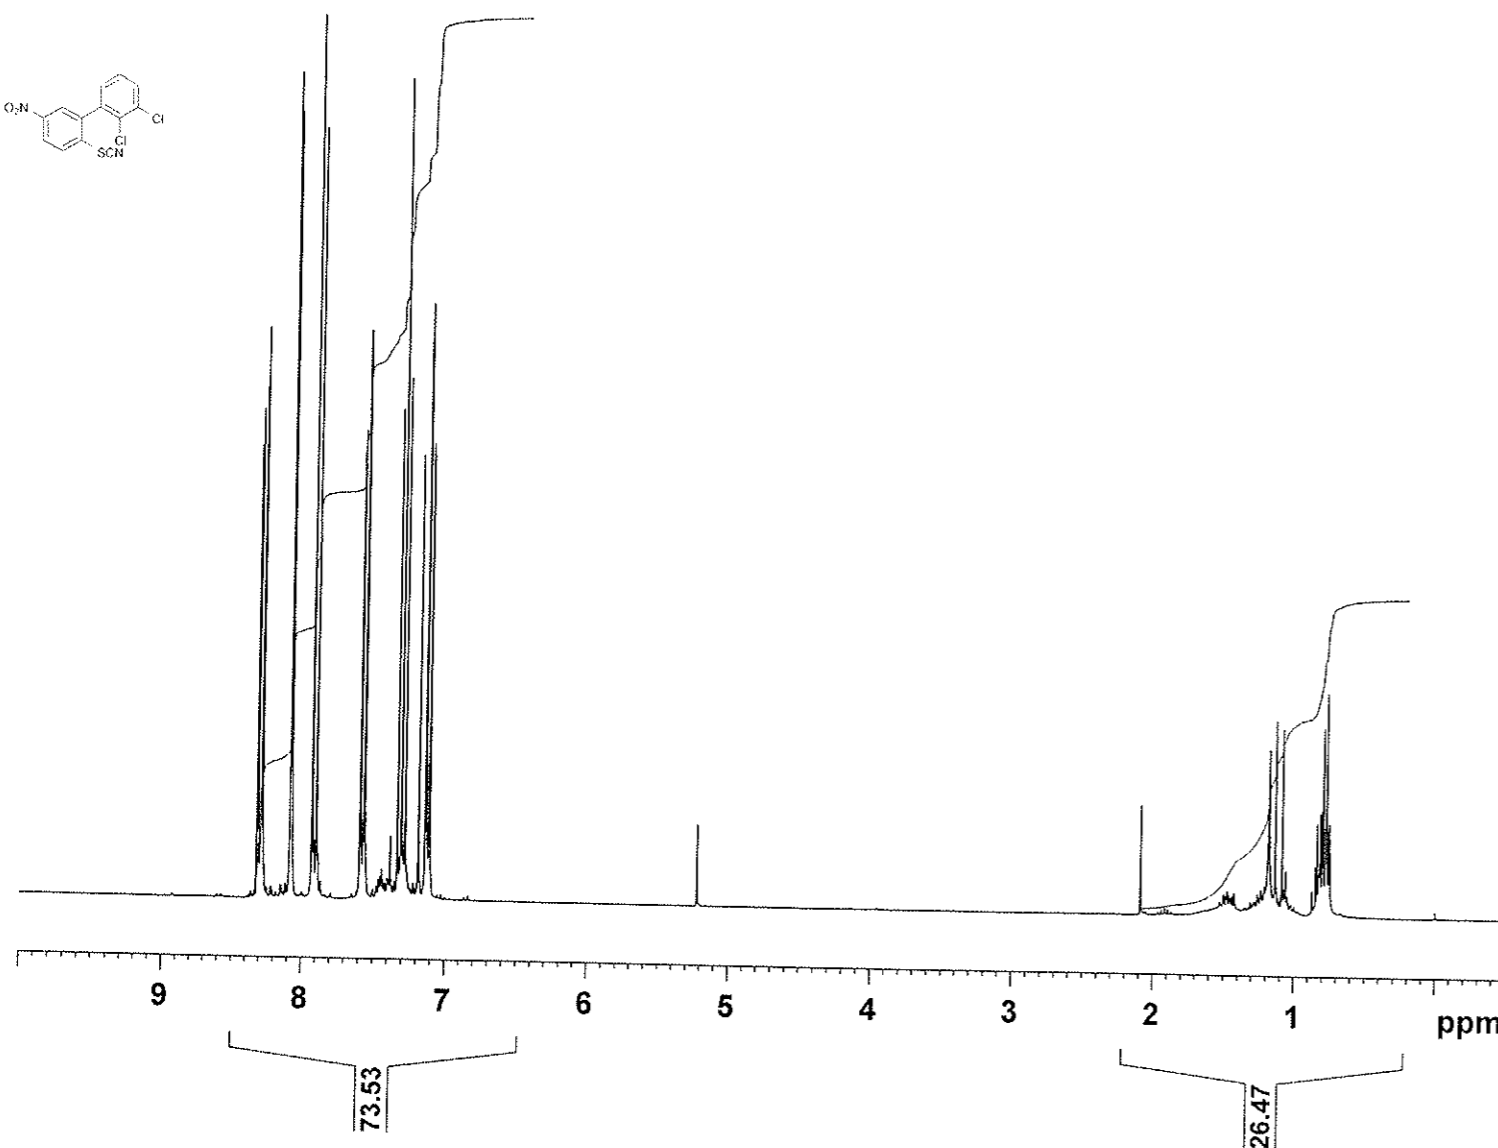

sr115b

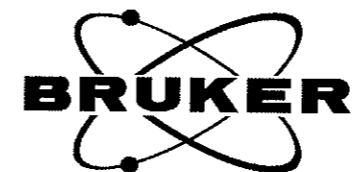

Current Data Parameters  
NAME sr115b  
EXPNO 1  
PROCNO 1

F2 - Acquisition Parameters  
Date\_ 20060220  
Time\_ 15.36  
INSTRUM spect  
PROBHD 5 mm Multinucl  
PULPROG zg30  
TD 32768  
SOLVENT CDC13  
NS 32  
DS 2  
SWH 6188.119 Hz  
FIDRES 0.188846 Hz  
AQ 2.6477852 sec  
RG 322.5  
DW 80.800 usec  
DE 6.00 usec  
TE 300.0 K  
D1 1.00000000 sec  
MCREST 0.00000000 sec  
MCWRK 0.01500000 sec

===== CHANNEL f1 =====  
NUC1 1H  
P1 10.00 usec  
PL1 2.00 dB  
SFO1 300.1318534 MHz

F2 - Processing parameters  
SI 32768  
SF 300.1300283 MHz  
WDW EM  
SSB 0  
LB 0.30 Hz  
GB 0  
PC 4.00

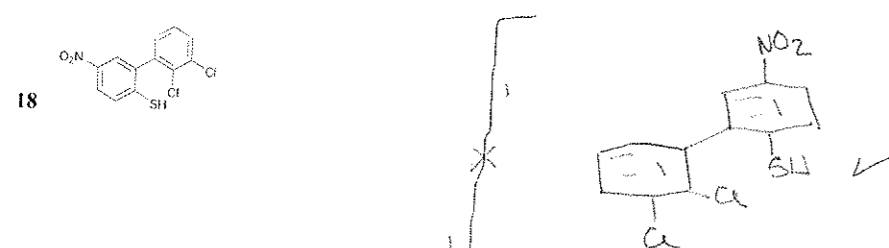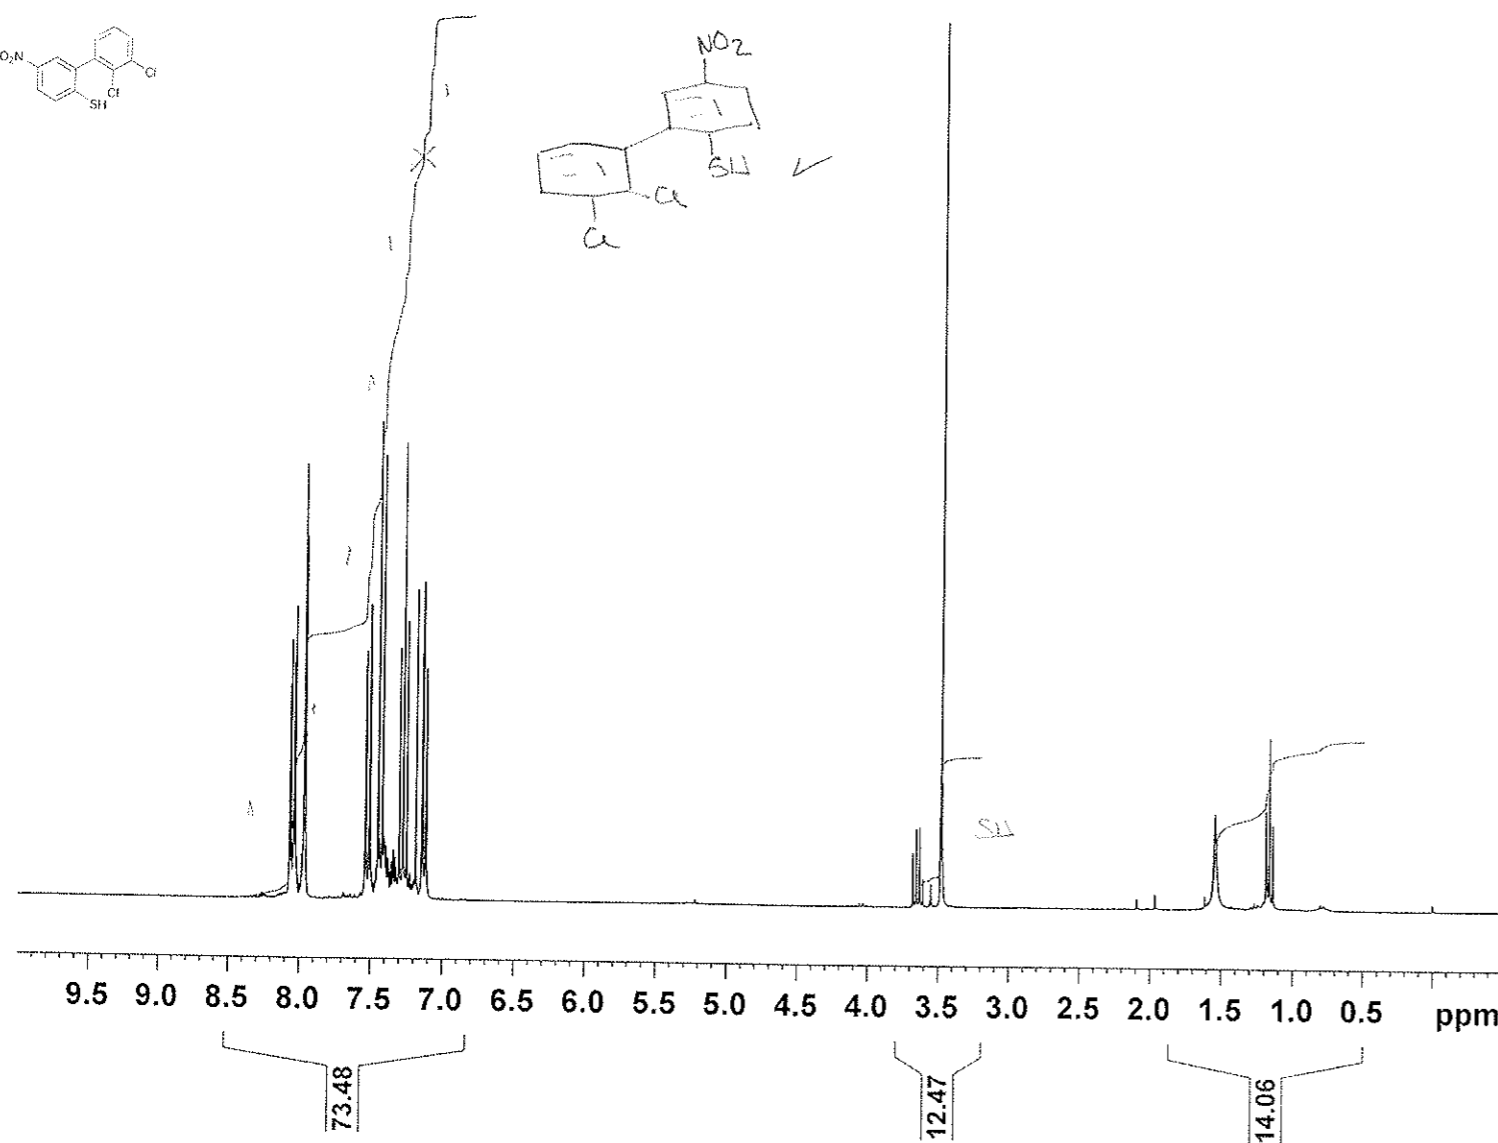

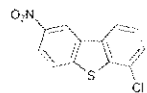

4

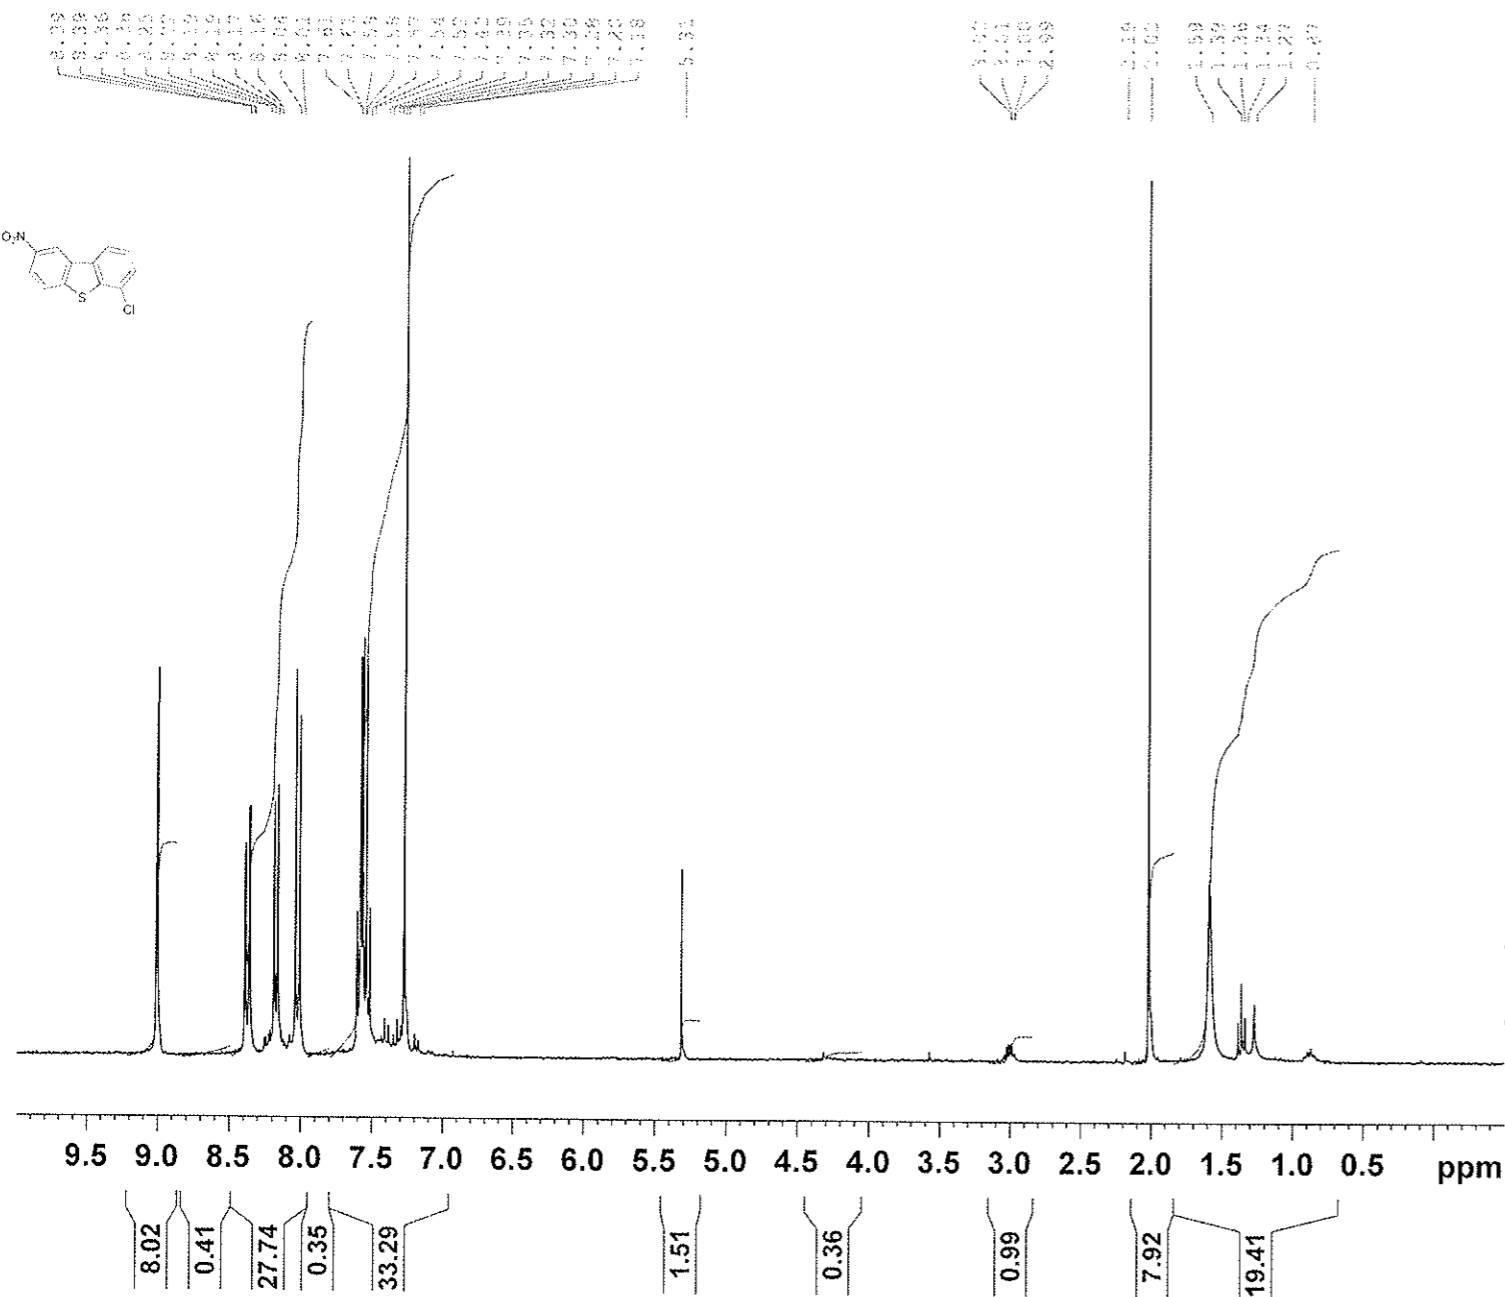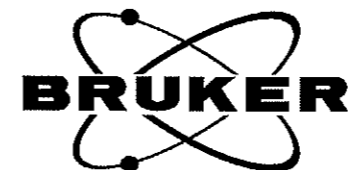

```
Current Data Parameters
NAME                sr121b
EXPNO                1
PROCNO              1
```

```

F2 - Acquisition Parameters
Date_                20060309
Time_                9.46
INSTRUM              spect
PROBHD               5 mm Multinucl
PULPROG              zg30
TD                   32768
SOLVENT              CDC13
NS                    8
DS                    0
SWH                  6188.119 Hz
FIDRES               0.188846 Hz
AQ                   2.6477852 sec
RG                   645.1
DW                   80.800 usec
DE                   6.00 usec
TE                   300.0 K
D1                   1.00000000 sec
MCREST               0.00000000 sec
MCWRK               0.01500000 sec

```

```

      CHANNEL f1
NUC1          1H
Pl            10.00 usec
PL1           2.00 dB
SFO1          300.1318534 MHz

```

```
F2 - Processing parameters
SI                      32768
SF                      300.1300000 MHz
WDW                      EM
SSB                      0
LB                      0.30 Hz
GB                      0
PC                      4.00
```
